# Supplementary material for: ZmNAC17 Regulates Mesocotyl Elongation by Mediating Auxin and ROS Biosynthetic Pathways in Maize
Source: MDPI journal article supplement (doi:10.3390/ijms25094585), 2024-04-23
Supplement: s1 [file s1]

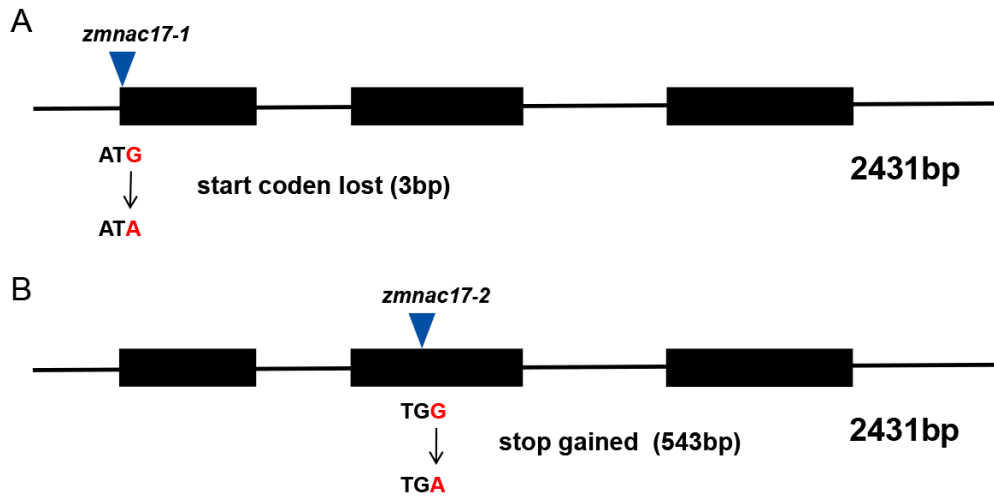

**Figure S1.** *zmnac17* mutation sites annotation. (A) *zmnac17-1* mutation site annotation. (B) *zmnac17-2* mutation site annotation.

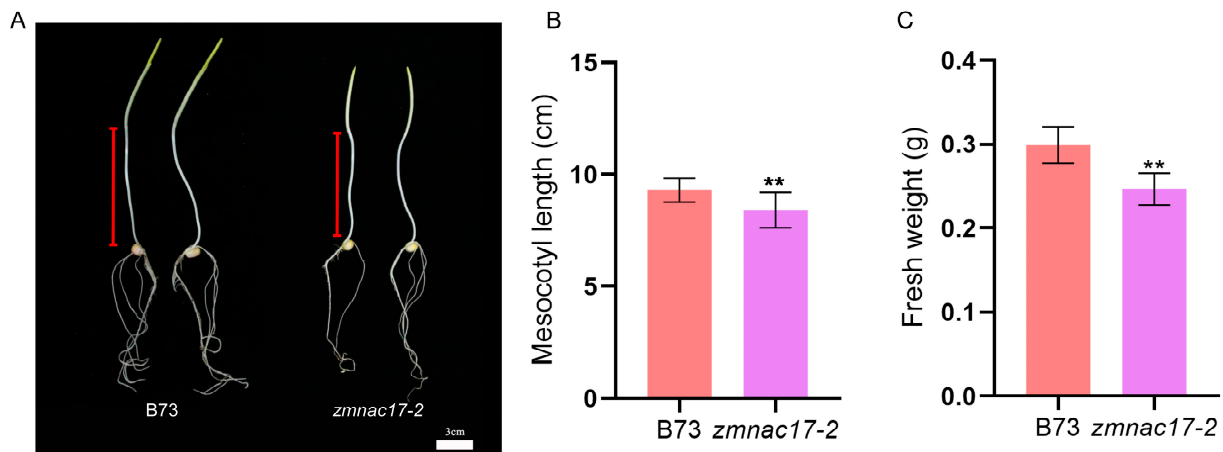

**Figure S2.** Phenotypic analyses of *zmnac17-2* mutant. (A) Seedling phenotypes of *zmnac17-2* grown in the dark for 7 days. Bars: 3 cm. (B) Results of quantification of mesocotyl length of B73 and *zmnac17-2*. (C) Results of quantification of mesocotyl fresh weight of B73 and *zmnac17-2*. Data are means  $\pm$  SDs of at least 10 biological replicates. Statistical analysis conducted by using Student's unpaired t-test (\*\*  $p < 0.01$ ).
