# Supplementary material for: ZmNAC17 Regulates Mesocotyl Elongation by Mediating Auxin and ROS Biosynthetic Pathways in Maize
Source: Int J Mol Sci. 2024 Apr 23;25(9):4585. doi: 10.3390/ijms25094585 (PMC11083593; doi:10.3390/ijms25094585)
Supplement: Supplementary file 1 [file ijms-25-04585-s001.zip]

Archive with 5 entries (5 files):
- ijms-2928753-Supplementary Table 1.xlsx
- ijms-2928753-Supplementary Table 2.xlsx
- ijms-2928753-Supplementary Table 3.xlsx
- ijms-2928753-Supplementary Table 4.xlsx
- ijms-2928753-supplementary.pdf
