# Supplementary material for: ZmNAC17 Regulates Mesocotyl Elongation by Mediating Auxin and ROS Biosynthetic Pathways in Maize
Source: Int J Mol Sci. 2024 Apr 23;25(9):4585. doi: 10.3390/ijms25094585 (PMC11083593; doi:10.3390/ijms25094585)
Supplement: Supplementary file 1 [file ijms-25-04585-s001.zip › ijms-2928753-Supplementary Table 1.xlsx]

## Sheet: Primers used in this study
Purpose	Name	Sequence (5'-3')
qRT “tryptophan metabolism” related genes	Zm00001eb396770-f	AGCTTGGATCGGTTGTGTCCA
	Zm00001eb396770-r	TTCCGAACAAATGGCGAAGCC
	Zm00001eb396780-f	TGGAGGGGAAATACCAGAAGC
	Zm00001eb396780-r	TCGGTGATGAATACAAGCCAGT
	Zm00001eb396760-f	TCCTTGCCAAGAGAGCAGCAT
	Zm00001eb396760-r	TGTGATTCTAGGACCCTGCTGA
	Zm00001eb416690-f	GGCTCATGACGTGCCTGGATTG
	Zm00001eb416690-r	CGGGTTGGTTTCGAGAGAATCGG
	Zm00001eb396790-f	TGAATACAAGCCAGTTGGCAAGC
	Zm00001eb396790-r	AGGCAGTACATTGGAGGGGAA
qRT “antioxidant activity” related genes	Zm00001eb330530-f	ACATATACAACGACACCAACGTGA
	Zm00001eb330530-r	TTGGTGTAGTAGGCGTTGTCG
	Zm00001eb333290-f	TCAGGGGGTTCGAGGTGGTA
	Zm00001eb333290-r	AAGCGCCACGTCCCAGTATG
	Zm00001eb111420-f	GCCTCCGACAGCTTTTGTCTG
	Zm00001eb111420-r	TCGTGTGAGCTCCTGAGAGTG
	Zm00001eb226370-f	AGAGAAGCCGTCTTCCTGAGTG
	Zm00001eb226370-r	TTGAGCTGGTCCAGGGTGAAG
	Zm00001eb109910-f	CAACCCCAACTTCACCAACGA
	Zm00001eb109910-r	ACAGCACATTGTGACGTAGCAC
	Zm00001eb348950-f	AGGTGGTCGATGGCATCAAGA
	Zm00001eb348950-r	TCCAGCGAGTTCGACGGAGAT
qRT Control gene	ZmActin-f	GTCCATGAGGCCACGTACAA
	ZmActin-r	CCGGACCAGTTTCGTCATA
zmnac17 genotyping	zmnac17-1-f	TGTAGCAGGTGGATCGGATC
	zmnac17-1-r	AATTAGACGCATGCACCACG
	zmnac17-2-f	TGTAGCAGGTGGATCGGATC
	zmnac17-2-r	GAACTCGTGCATGACCCAG
