# Supplementary material for: ZmNAC17 Regulates Mesocotyl Elongation by Mediating Auxin and ROS Biosynthetic Pathways in Maize
Source: Int J Mol Sci. 2024 Apr 23;25(9):4585. doi: 10.3390/ijms25094585 (PMC11083593; doi:10.3390/ijms25094585)
Supplement: Supplementary file 1 [file ijms-25-04585-s001.zip › ijms-2928753-Supplementary Table 2.xlsx]

## Sheet: Statistical table of comparativ
Sample	Total Reads	Reads mapped	Unique mapped	Multi mapped	Read1 mapped	Read2 mapped	+' mapped	-' mapped
B73-1	50022384	49185080(98.33%)	47568075(95.09%)	1617005(3.23%)	23786199(47.55%)	23781876(47.54%)	23782127(47.54%)	23785948(47.55%)
B73-2	58358702	57322863(98.23%)	55417405(94.96%)	1905458(3.27%)	27737639(47.53%)	27679766(47.43%)	27704522(47.47%)	27712883(47.49%)
B73-3	53460468	52482919(98.17%)	50736153(94.90%)	1746766(3.27%)	25400147(47.51%)	25336006(47.39%)	25361902(47.44%)	25374251(47.46%)
B73-4	50658808	49765183(98.24%)	48103521(94.96%)	1661662(3.28%)	24082208(47.54%)	24021313(47.42%)	24048376(47.47%)	24055145(47.48%)
zmnac17-1-1	52801536	51967499(98.42%)	50159843(95.00%)	1807656(3.42%)	25080497(47.50%)	25079346(47.50%)	25076977(47.49%)	25082866(47.50%)
zmnac17-1-2	47680866	46896768(98.36%)	45350832(95.11%)	1545936(3.24%)	22683206(47.57%)	22667626(47.54%)	22672824(47.55%)	22678008(47.56%)
zmnac17-1-3	45757896	45020357(98.39%)	43528198(95.13%)	1492159(3.26%)	21763741(47.56%)	21764457(47.56%)	21761751(47.56%)	21766447(47.57%)
zmnac17-1-4	47661128	46882102(98.37%)	45358361(95.17%)	1523741(3.20%)	22681903(47.59%)	22676458(47.58%)	22676692(47.58%)	22681669(47.59%)
