# Supplementary material for: ZmNAC17 Regulates Mesocotyl Elongation by Mediating Auxin and ROS Biosynthetic Pathways in Maize
Source: Int J Mol Sci. 2024 Apr 23;25(9):4585. doi: 10.3390/ijms25094585 (PMC11083593; doi:10.3390/ijms25094585)
Supplement: Supplementary file 1 [file ijms-25-04585-s001.zip › ijms-2928753-Supplementary Table 3.xlsx]

## Sheet: GO enrichment
GO_level_1	GO	Description	P-value	All_index	Count_all	Up_index	Count_up	Down_index	Count_down
Biological process	GO:0009873	ethylene-activated signaling pathway	4.55942e-09	Zm00001eb071190;Zm00001eb413930;Zm00001eb074930;Zm00001eb038070;Zm00001eb187190;Zm00001eb193550;Zm00001eb066890;Zm00001eb100800;Zm00001eb373370;Zm00001eb307550;Zm00001eb279090;Zm00001eb331080;Zm00001eb009250;Zm00001eb285760;Zm00001eb249290;Zm00001eb168040;Zm00001eb193670;Zm00001eb023680;Zm00001eb352570;Zm00001eb013600	20	Zm00001eb285760	1	Zm00001eb071190;Zm00001eb413930;Zm00001eb074930;Zm00001eb038070;Zm00001eb187190;Zm00001eb193550;Zm00001eb066890;Zm00001eb100800;Zm00001eb373370;Zm00001eb307550;Zm00001eb279090;Zm00001eb331080;Zm00001eb009250;Zm00001eb249290;Zm00001eb168040;Zm00001eb193670;Zm00001eb023680;Zm00001eb352570;Zm00001eb013600	19
Biological process	GO:0071369	cellular response to ethylene stimulus	8.29031e-09	Zm00001eb071190;Zm00001eb413930;Zm00001eb074930;Zm00001eb038070;Zm00001eb187190;Zm00001eb193550;Zm00001eb066890;Zm00001eb100800;Zm00001eb373370;Zm00001eb307550;Zm00001eb279090;Zm00001eb331080;Zm00001eb009250;Zm00001eb285760;Zm00001eb249290;Zm00001eb168040;Zm00001eb193670;Zm00001eb023680;Zm00001eb352570;Zm00001eb013600	20	Zm00001eb285760	1	Zm00001eb071190;Zm00001eb413930;Zm00001eb074930;Zm00001eb038070;Zm00001eb187190;Zm00001eb193550;Zm00001eb066890;Zm00001eb100800;Zm00001eb373370;Zm00001eb307550;Zm00001eb279090;Zm00001eb331080;Zm00001eb009250;Zm00001eb249290;Zm00001eb168040;Zm00001eb193670;Zm00001eb023680;Zm00001eb352570;Zm00001eb013600	19
Biological process	GO:0000160	phosphorelay signal transduction system	6.36463e-08	Zm00001eb071190;Zm00001eb413930;Zm00001eb074930;Zm00001eb038070;Zm00001eb187190;Zm00001eb193550;Zm00001eb066890;Zm00001eb100800;Zm00001eb373370;Zm00001eb307550;Zm00001eb279090;Zm00001eb331080;Zm00001eb009250;Zm00001eb285760;Zm00001eb249290;Zm00001eb168040;Zm00001eb193670;Zm00001eb023680;Zm00001eb352570;Zm00001eb013600	20	Zm00001eb285760	1	Zm00001eb071190;Zm00001eb413930;Zm00001eb074930;Zm00001eb038070;Zm00001eb187190;Zm00001eb193550;Zm00001eb066890;Zm00001eb100800;Zm00001eb373370;Zm00001eb307550;Zm00001eb279090;Zm00001eb331080;Zm00001eb009250;Zm00001eb249290;Zm00001eb168040;Zm00001eb193670;Zm00001eb023680;Zm00001eb352570;Zm00001eb013600	19
Biological process	GO:0120254	olefinic compound metabolic process	2.9357e-06	Zm00001eb251960;Zm00001eb300240;Zm00001eb396770;Zm00001eb396780;Zm00001eb009250;Zm00001eb396760;Zm00001eb071090;Zm00001eb073290;Zm00001eb218680;Zm00001eb396790;Zm00001eb055950	11	Zm00001eb218680	1	Zm00001eb251960;Zm00001eb300240;Zm00001eb396770;Zm00001eb396780;Zm00001eb009250;Zm00001eb396760;Zm00001eb071090;Zm00001eb073290;Zm00001eb396790;Zm00001eb055950	10
Biological process	GO:0006714	sesquiterpenoid metabolic process	6.11639e-06	Zm00001eb251960;Zm00001eb300240;Zm00001eb396770;Zm00001eb396780;Zm00001eb396760;Zm00001eb071090;Zm00001eb218680;Zm00001eb396790	8	Zm00001eb218680	1	Zm00001eb251960;Zm00001eb300240;Zm00001eb396770;Zm00001eb396780;Zm00001eb396760;Zm00001eb071090;Zm00001eb396790	7
Biological process	GO:0010200	response to chitin	8.6657e-06	Zm00001eb234120;Zm00001eb275080;Zm00001eb206730;Zm00001eb187340;Zm00001eb388620;Zm00001eb187290	6	--	0	Zm00001eb234120;Zm00001eb275080;Zm00001eb206730;Zm00001eb187340;Zm00001eb388620;Zm00001eb187290	6
Biological process	GO:0120255	olefinic compound biosynthetic process	8.93796e-06	Zm00001eb300240;Zm00001eb396770;Zm00001eb396780;Zm00001eb009250;Zm00001eb396760;Zm00001eb071090;Zm00001eb073290;Zm00001eb218680;Zm00001eb396790;Zm00001eb055950	10	Zm00001eb218680	1	Zm00001eb300240;Zm00001eb396770;Zm00001eb396780;Zm00001eb009250;Zm00001eb396760;Zm00001eb071090;Zm00001eb073290;Zm00001eb396790;Zm00001eb055950	9
Biological process	GO:0006721	terpenoid metabolic process	1.30306e-05	Zm00001eb234120;Zm00001eb251960;Zm00001eb206730;Zm00001eb300240;Zm00001eb283860;Zm00001eb396770;Zm00001eb412980;Zm00001eb396780;Zm00001eb412960;Zm00001eb396760;Zm00001eb071090;Zm00001eb415070;Zm00001eb218680;Zm00001eb396790	14	Zm00001eb412980;Zm00001eb412960;Zm00001eb218680	3	Zm00001eb234120;Zm00001eb251960;Zm00001eb206730;Zm00001eb300240;Zm00001eb283860;Zm00001eb396770;Zm00001eb396780;Zm00001eb396760;Zm00001eb071090;Zm00001eb415070;Zm00001eb396790	11
Biological process	GO:0009753	response to jasmonic acid	1.9728e-05	Zm00001eb415520;Zm00001eb234120;novel.2202;Zm00001eb286490;Zm00001eb006000;Zm00001eb206730;Zm00001eb350280;Zm00001eb193550;Zm00001eb346880;Zm00001eb307550;Zm00001eb425100;Zm00001eb420440;Zm00001eb071090;Zm00001eb285760	14	Zm00001eb285760	1	Zm00001eb415520;Zm00001eb234120;novel.2202;Zm00001eb286490;Zm00001eb006000;Zm00001eb206730;Zm00001eb350280;Zm00001eb193550;Zm00001eb346880;Zm00001eb307550;Zm00001eb425100;Zm00001eb420440;Zm00001eb071090	13
Biological process	GO:0009687	abscisic acid metabolic process	2.15783e-05	Zm00001eb251960;Zm00001eb300240;Zm00001eb396770;Zm00001eb396780;Zm00001eb396760;Zm00001eb218680;Zm00001eb396790	7	Zm00001eb218680	1	Zm00001eb251960;Zm00001eb300240;Zm00001eb396770;Zm00001eb396780;Zm00001eb396760;Zm00001eb396790	6
Biological process	GO:0043288	apocarotenoid metabolic process	2.15783e-05	Zm00001eb251960;Zm00001eb300240;Zm00001eb396770;Zm00001eb396780;Zm00001eb396760;Zm00001eb218680;Zm00001eb396790	7	Zm00001eb218680	1	Zm00001eb251960;Zm00001eb300240;Zm00001eb396770;Zm00001eb396780;Zm00001eb396760;Zm00001eb396790	6
Biological process	GO:1902644	tertiary alcohol metabolic process	2.15783e-05	Zm00001eb251960;Zm00001eb300240;Zm00001eb396770;Zm00001eb396780;Zm00001eb396760;Zm00001eb218680;Zm00001eb396790	7	Zm00001eb218680	1	Zm00001eb251960;Zm00001eb300240;Zm00001eb396770;Zm00001eb396780;Zm00001eb396760;Zm00001eb396790	6
Biological process	GO:0070542	response to fatty acid	2.40952e-05	Zm00001eb415520;Zm00001eb234120;novel.2202;Zm00001eb286490;Zm00001eb006000;Zm00001eb206730;Zm00001eb350280;Zm00001eb193550;Zm00001eb346880;Zm00001eb307550;Zm00001eb425100;Zm00001eb420440;Zm00001eb071090;Zm00001eb285760	14	Zm00001eb285760	1	Zm00001eb415520;Zm00001eb234120;novel.2202;Zm00001eb286490;Zm00001eb006000;Zm00001eb206730;Zm00001eb350280;Zm00001eb193550;Zm00001eb346880;Zm00001eb307550;Zm00001eb425100;Zm00001eb420440;Zm00001eb071090	13
Biological process	GO:0016106	sesquiterpenoid biosynthetic process	2.78149e-05	Zm00001eb300240;Zm00001eb396770;Zm00001eb396780;Zm00001eb396760;Zm00001eb071090;Zm00001eb218680;Zm00001eb396790	7	Zm00001eb218680	1	Zm00001eb300240;Zm00001eb396770;Zm00001eb396780;Zm00001eb396760;Zm00001eb071090;Zm00001eb396790	6
Biological process	GO:0009688	abscisic acid biosynthetic process	9.90145e-05	Zm00001eb300240;Zm00001eb396770;Zm00001eb396780;Zm00001eb396760;Zm00001eb218680;Zm00001eb396790	6	Zm00001eb218680	1	Zm00001eb300240;Zm00001eb396770;Zm00001eb396780;Zm00001eb396760;Zm00001eb396790	5
Biological process	GO:0043289	apocarotenoid biosynthetic process	9.90145e-05	Zm00001eb300240;Zm00001eb396770;Zm00001eb396780;Zm00001eb396760;Zm00001eb218680;Zm00001eb396790	6	Zm00001eb218680	1	Zm00001eb300240;Zm00001eb396770;Zm00001eb396780;Zm00001eb396760;Zm00001eb396790	5
Biological process	GO:1902645	tertiary alcohol biosynthetic process	9.90145e-05	Zm00001eb300240;Zm00001eb396770;Zm00001eb396780;Zm00001eb396760;Zm00001eb218680;Zm00001eb396790	6	Zm00001eb218680	1	Zm00001eb300240;Zm00001eb396770;Zm00001eb396780;Zm00001eb396760;Zm00001eb396790	5
Biological process	GO:0006720	isoprenoid metabolic process	0.000152533	Zm00001eb234120;Zm00001eb251960;Zm00001eb206730;Zm00001eb300240;Zm00001eb283860;Zm00001eb396770;Zm00001eb412980;Zm00001eb396780;Zm00001eb412960;Zm00001eb396760;Zm00001eb071090;Zm00001eb415070;Zm00001eb218680;Zm00001eb396790	14	Zm00001eb412980;Zm00001eb412960;Zm00001eb218680	3	Zm00001eb234120;Zm00001eb251960;Zm00001eb206730;Zm00001eb300240;Zm00001eb283860;Zm00001eb396770;Zm00001eb396780;Zm00001eb396760;Zm00001eb071090;Zm00001eb415070;Zm00001eb396790	11
Biological process	GO:0009938	negative regulation of gibberellic acid mediated signaling pathway	0.000154964	Zm00001eb234120;Zm00001eb286490;Zm00001eb206730;Zm00001eb350280	4	--	0	Zm00001eb234120;Zm00001eb286490;Zm00001eb206730;Zm00001eb350280	4
Biological process	GO:0016101	diterpenoid metabolic process	0.000228231	Zm00001eb234120;Zm00001eb206730;Zm00001eb283860;Zm00001eb412980;Zm00001eb412960;Zm00001eb071090;Zm00001eb415070	7	Zm00001eb412980;Zm00001eb412960	2	Zm00001eb234120;Zm00001eb206730;Zm00001eb283860;Zm00001eb071090;Zm00001eb415070	5
Biological process	GO:0009751	response to salicylic acid	0.00032132	Zm00001eb234120;Zm00001eb330730;Zm00001eb206730;Zm00001eb193550;Zm00001eb434140;Zm00001eb373370;Zm00001eb111590;Zm00001eb425100;Zm00001eb350600;Zm00001eb184830	10	Zm00001eb350600;Zm00001eb184830	2	Zm00001eb234120;Zm00001eb330730;Zm00001eb206730;Zm00001eb193550;Zm00001eb434140;Zm00001eb373370;Zm00001eb111590;Zm00001eb425100	8
Biological process	GO:0042446	hormone biosynthetic process	0.000857014	Zm00001eb160700;Zm00001eb396770;Zm00001eb396780;Zm00001eb396760;Zm00001eb300570;Zm00001eb396790;Zm00001eb312250	7	Zm00001eb300570;Zm00001eb312250	2	Zm00001eb160700;Zm00001eb396770;Zm00001eb396780;Zm00001eb396760;Zm00001eb396790	5
Biological process	GO:0032101	regulation of response to external stimulus	0.000965247	Zm00001eb415520;Zm00001eb275080;Zm00001eb330730;Zm00001eb172290;Zm00001eb309760;Zm00001eb245520;Zm00001eb373370;Zm00001eb111590;Zm00001eb388620;Zm00001eb420440;Zm00001eb052520;Zm00001eb430040;Zm00001eb080230	13	Zm00001eb052520;Zm00001eb430040	2	Zm00001eb415520;Zm00001eb275080;Zm00001eb330730;Zm00001eb172290;Zm00001eb309760;Zm00001eb245520;Zm00001eb373370;Zm00001eb111590;Zm00001eb388620;Zm00001eb420440;Zm00001eb080230	11
Biological process	GO:0016114	terpenoid biosynthetic process	0.00107718	Zm00001eb300240;Zm00001eb396770;Zm00001eb412980;Zm00001eb396780;Zm00001eb412960;Zm00001eb396760;Zm00001eb071090;Zm00001eb415070;Zm00001eb218680;Zm00001eb396790	10	Zm00001eb412980;Zm00001eb412960;Zm00001eb218680	3	Zm00001eb300240;Zm00001eb396770;Zm00001eb396780;Zm00001eb396760;Zm00001eb071090;Zm00001eb415070;Zm00001eb396790	7
Biological process	GO:1901617	organic hydroxy compound biosynthetic process	0.00130535	Zm00001eb300240;Zm00001eb396770;Zm00001eb396780;Zm00001eb396760;Zm00001eb071090;Zm00001eb335390;Zm00001eb416690;Zm00001eb300570;Zm00001eb218680;Zm00001eb135830;Zm00001eb396790;novel.484	12	Zm00001eb416690;Zm00001eb300570;Zm00001eb218680;Zm00001eb135830	4	Zm00001eb300240;Zm00001eb396770;Zm00001eb396780;Zm00001eb396760;Zm00001eb071090;Zm00001eb335390;Zm00001eb396790;novel.484	8
Biological process	GO:0030100	regulation of endocytosis	0.00133179	Zm00001eb330730;Zm00001eb111590;Zm00001eb311920	3	--	0	Zm00001eb330730;Zm00001eb111590;Zm00001eb311920	3
Biological process	GO:0009611	response to wounding	0.00188202	Zm00001eb234120;novel.2202;Zm00001eb006000;Zm00001eb206730;Zm00001eb434140;Zm00001eb373370;Zm00001eb267640;Zm00001eb196960;Zm00001eb425100;Zm00001eb331080;Zm00001eb009250	11	--	0	Zm00001eb234120;novel.2202;Zm00001eb006000;Zm00001eb206730;Zm00001eb434140;Zm00001eb373370;Zm00001eb267640;Zm00001eb196960;Zm00001eb425100;Zm00001eb331080;Zm00001eb009250	11
Biological process	GO:0006568	tryptophan metabolic process	0.00195247	Zm00001eb038070;Zm00001eb100800;Zm00001eb367110;Zm00001eb416690	4	Zm00001eb416690	1	Zm00001eb038070;Zm00001eb100800;Zm00001eb367110	3
Biological process	GO:0006586	indolalkylamine metabolic process	0.00195247	Zm00001eb038070;Zm00001eb100800;Zm00001eb367110;Zm00001eb416690	4	Zm00001eb416690	1	Zm00001eb038070;Zm00001eb100800;Zm00001eb367110	3
Biological process	GO:0009685	gibberellin metabolic process	0.00195247	Zm00001eb234120;Zm00001eb206730;Zm00001eb283860;Zm00001eb071090	4	--	0	Zm00001eb234120;Zm00001eb206730;Zm00001eb283860;Zm00001eb071090	4
Biological process	GO:0009937	regulation of gibberellic acid mediated signaling pathway	0.00195247	Zm00001eb234120;Zm00001eb286490;Zm00001eb206730;Zm00001eb350280	4	--	0	Zm00001eb234120;Zm00001eb286490;Zm00001eb206730;Zm00001eb350280	4
Biological process	GO:0008300	isoprenoid catabolic process	0.00244346	Zm00001eb251960;Zm00001eb300240;Zm00001eb283860;Zm00001eb218680	4	Zm00001eb218680	1	Zm00001eb251960;Zm00001eb300240;Zm00001eb283860	3
Biological process	GO:0120252	hydrocarbon metabolic process	0.00252045	Zm00001eb300240;Zm00001eb009250;Zm00001eb071090;Zm00001eb073290;Zm00001eb218680;Zm00001eb055950	6	Zm00001eb218680	1	Zm00001eb300240;Zm00001eb009250;Zm00001eb071090;Zm00001eb073290;Zm00001eb055950	5
Biological process	GO:0045088	regulation of innate immune response	0.00275724	Zm00001eb275080;Zm00001eb172290;Zm00001eb245520;Zm00001eb373370;Zm00001eb388620;Zm00001eb430040;Zm00001eb080230	7	Zm00001eb430040	1	Zm00001eb275080;Zm00001eb172290;Zm00001eb245520;Zm00001eb373370;Zm00001eb388620;Zm00001eb080230	6
Biological process	GO:0042430	indole-containing compound metabolic process	0.00360819	Zm00001eb038070;Zm00001eb100800;Zm00001eb367110;Zm00001eb009250;Zm00001eb416690	5	Zm00001eb416690	1	Zm00001eb038070;Zm00001eb100800;Zm00001eb367110;Zm00001eb009250	4
Biological process	GO:0009664	plant-type cell wall organization	0.00469646	Zm00001eb341630;Zm00001eb071650;Zm00001eb270290;novel.2189;Zm00001eb356620;Zm00001eb128450;Zm00001eb125890;Zm00001eb347730;Zm00001eb419530	9	novel.2189;Zm00001eb356620;Zm00001eb128450;Zm00001eb125890;Zm00001eb347730;Zm00001eb419530	6	Zm00001eb341630;Zm00001eb071650;Zm00001eb270290	3
Biological process	GO:0042744	hydrogen peroxide catabolic process	0.00481776	Zm00001eb330530;Zm00001eb333290;Zm00001eb111420;Zm00001eb226370;Zm00001eb333000;Zm00001eb109910;Zm00001eb348950	7	Zm00001eb226370;Zm00001eb109910	2	Zm00001eb330530;Zm00001eb333290;Zm00001eb111420;Zm00001eb333000;Zm00001eb348950	5
Biological process	GO:0002679	respiratory burst involved in defense response	0.00518456	Zm00001eb243070;Zm00001eb065620	2	--	0	Zm00001eb243070;Zm00001eb065620	2
Biological process	GO:0046165	alcohol biosynthetic process	0.00525089	Zm00001eb300240;Zm00001eb396770;Zm00001eb396780;Zm00001eb396760;Zm00001eb071090;Zm00001eb218680;Zm00001eb396790	7	Zm00001eb218680	1	Zm00001eb300240;Zm00001eb396770;Zm00001eb396780;Zm00001eb396760;Zm00001eb071090;Zm00001eb396790	6
Biological process	GO:0009851	auxin biosynthetic process	0.00619377	Zm00001eb396770;Zm00001eb396780;Zm00001eb396760;Zm00001eb396790	4	--	0	Zm00001eb396770;Zm00001eb396780;Zm00001eb396760;Zm00001eb396790	4
Biological process	GO:0002831	regulation of response to biotic stimulus	0.00620021	Zm00001eb275080;Zm00001eb330730;Zm00001eb172290;Zm00001eb309760;Zm00001eb245520;Zm00001eb373370;Zm00001eb111590;Zm00001eb388620;Zm00001eb052520;Zm00001eb430040;Zm00001eb080230	11	Zm00001eb052520;Zm00001eb430040	2	Zm00001eb275080;Zm00001eb330730;Zm00001eb172290;Zm00001eb309760;Zm00001eb245520;Zm00001eb373370;Zm00001eb111590;Zm00001eb388620;Zm00001eb080230	9
Biological process	GO:0010077	maintenance of inflorescence meristem identity	0.00629057	Zm00001eb428330;Zm00001eb150860	2	Zm00001eb428330;Zm00001eb150860	2	--	0
Biological process	GO:0008299	isoprenoid biosynthetic process	0.00663662	Zm00001eb300240;Zm00001eb396770;Zm00001eb412980;Zm00001eb396780;Zm00001eb412960;Zm00001eb396760;Zm00001eb071090;Zm00001eb415070;Zm00001eb218680;Zm00001eb396790	10	Zm00001eb412980;Zm00001eb412960;Zm00001eb218680	3	Zm00001eb300240;Zm00001eb396770;Zm00001eb396780;Zm00001eb396760;Zm00001eb071090;Zm00001eb415070;Zm00001eb396790	7
Biological process	GO:0043903	regulation of biological process involved in symbiotic interaction	0.0067667	Zm00001eb172290;Zm00001eb052520;Zm00001eb430040	3	Zm00001eb052520;Zm00001eb430040	2	Zm00001eb172290	1
Biological process	GO:0045730	respiratory burst	0.0074938	Zm00001eb243070;Zm00001eb065620	2	--	0	Zm00001eb243070;Zm00001eb065620	2
Biological process	GO:0031099	regeneration	0.00879197	Zm00001eb038070;Zm00001eb100800	2	--	0	Zm00001eb038070;Zm00001eb100800	2
Biological process	GO:0006066	alcohol metabolic process	0.00898896	Zm00001eb251960;Zm00001eb300240;Zm00001eb396770;Zm00001eb396780;Zm00001eb396760;Zm00001eb071090;Zm00001eb218680;Zm00001eb396790;Zm00001eb311920	9	Zm00001eb218680	1	Zm00001eb251960;Zm00001eb300240;Zm00001eb396770;Zm00001eb396780;Zm00001eb396760;Zm00001eb071090;Zm00001eb396790;Zm00001eb311920	8
Biological process	GO:0045892	negative regulation of DNA-templated transcription	0.0110704	Zm00001eb234120;Zm00001eb275080;Zm00001eb206730;Zm00001eb413930;Zm00001eb388620;Zm00001eb428330;Zm00001eb150860;Zm00001eb267730;Zm00001eb149450	9	Zm00001eb428330;Zm00001eb150860;Zm00001eb267730	3	Zm00001eb234120;Zm00001eb275080;Zm00001eb206730;Zm00001eb413930;Zm00001eb388620;Zm00001eb149450	6
Biological process	GO:0002682	regulation of immune system process	0.0113428	Zm00001eb275080;Zm00001eb172290;Zm00001eb245520;Zm00001eb373370;Zm00001eb388620;Zm00001eb430040;Zm00001eb080230	7	Zm00001eb430040	1	Zm00001eb275080;Zm00001eb172290;Zm00001eb245520;Zm00001eb373370;Zm00001eb388620;Zm00001eb080230	6
Biological process	GO:0050776	regulation of immune response	0.0113428	Zm00001eb275080;Zm00001eb172290;Zm00001eb245520;Zm00001eb373370;Zm00001eb388620;Zm00001eb430040;Zm00001eb080230	7	Zm00001eb430040	1	Zm00001eb275080;Zm00001eb172290;Zm00001eb245520;Zm00001eb373370;Zm00001eb388620;Zm00001eb080230	6
Biological process	GO:0010492	maintenance of shoot apical meristem identity	0.0116643	Zm00001eb428330;Zm00001eb150860	2	Zm00001eb428330;Zm00001eb150860	2	--	0
Biological process	GO:0032104	regulation of response to extracellular stimulus	0.0116643	Zm00001eb415520;Zm00001eb420440	2	--	0	Zm00001eb415520;Zm00001eb420440	2
Biological process	GO:0032107	regulation of response to nutrient levels	0.0116643	Zm00001eb415520;Zm00001eb420440	2	--	0	Zm00001eb415520;Zm00001eb420440	2
Biological process	GO:0042445	hormone metabolic process	0.0121529	Zm00001eb160700;Zm00001eb396770;Zm00001eb396780;Zm00001eb396760;Zm00001eb300570;Zm00001eb396790;Zm00001eb312250	7	Zm00001eb300570;Zm00001eb312250	2	Zm00001eb160700;Zm00001eb396770;Zm00001eb396780;Zm00001eb396760;Zm00001eb396790	5
Biological process	GO:1902679	negative regulation of RNA biosynthetic process	0.0125713	Zm00001eb234120;Zm00001eb275080;Zm00001eb206730;Zm00001eb413930;Zm00001eb388620;Zm00001eb428330;Zm00001eb150860;Zm00001eb267730;Zm00001eb149450	9	Zm00001eb428330;Zm00001eb150860;Zm00001eb267730	3	Zm00001eb234120;Zm00001eb275080;Zm00001eb206730;Zm00001eb413930;Zm00001eb388620;Zm00001eb149450	6
Biological process	GO:1903507	negative regulation of nucleic acid-templated transcription	0.0125713	Zm00001eb234120;Zm00001eb275080;Zm00001eb206730;Zm00001eb413930;Zm00001eb388620;Zm00001eb428330;Zm00001eb150860;Zm00001eb267730;Zm00001eb149450	9	Zm00001eb428330;Zm00001eb150860;Zm00001eb267730	3	Zm00001eb234120;Zm00001eb275080;Zm00001eb206730;Zm00001eb413930;Zm00001eb388620;Zm00001eb149450	6
Biological process	GO:0006521	regulation of cellular amino acid metabolic process	0.013234	Zm00001eb038070;Zm00001eb100800	2	--	0	Zm00001eb038070;Zm00001eb100800	2
Biological process	GO:0033238	regulation of cellular amine metabolic process	0.013234	Zm00001eb038070;Zm00001eb100800	2	--	0	Zm00001eb038070;Zm00001eb100800	2
Biological process	GO:0009308	amine metabolic process	0.0135312	Zm00001eb160700;Zm00001eb038070;Zm00001eb100800;Zm00001eb367110;Zm00001eb416690;Zm00001eb312250	6	Zm00001eb416690;Zm00001eb312250	2	Zm00001eb160700;Zm00001eb038070;Zm00001eb100800;Zm00001eb367110	4
Biological process	GO:0051865	protein autoubiquitination	0.0152145	Zm00001eb243070;Zm00001eb065620;Zm00001eb135470	3	Zm00001eb135470	1	Zm00001eb243070;Zm00001eb065620	2
Biological process	GO:0042743	hydrogen peroxide metabolic process	0.0158136	Zm00001eb330530;Zm00001eb333290;Zm00001eb111420;Zm00001eb226370;Zm00001eb333000;Zm00001eb109910;Zm00001eb348950	7	Zm00001eb226370;Zm00001eb109910	2	Zm00001eb330530;Zm00001eb333290;Zm00001eb111420;Zm00001eb333000;Zm00001eb348950	5
Biological process	GO:0016102	diterpenoid biosynthetic process	0.0166069	Zm00001eb412980;Zm00001eb412960;Zm00001eb071090;Zm00001eb415070	4	Zm00001eb412980;Zm00001eb412960	2	Zm00001eb071090;Zm00001eb415070	2
Biological process	GO:0010817	regulation of hormone levels	0.0167257	Zm00001eb406090;Zm00001eb160700;Zm00001eb396770;Zm00001eb241870;Zm00001eb396780;Zm00001eb396760;Zm00001eb100380;Zm00001eb163460;Zm00001eb300570;Zm00001eb396790;Zm00001eb312250	11	Zm00001eb406090;Zm00001eb241870;Zm00001eb163460;Zm00001eb300570;Zm00001eb312250	5	Zm00001eb160700;Zm00001eb396770;Zm00001eb396780;Zm00001eb396760;Zm00001eb100380;Zm00001eb396790	6
Biological process	GO:0051253	negative regulation of RNA metabolic process	0.017123	Zm00001eb234120;Zm00001eb275080;Zm00001eb206730;Zm00001eb413930;Zm00001eb388620;Zm00001eb428330;Zm00001eb150860;Zm00001eb267730;Zm00001eb149450	9	Zm00001eb428330;Zm00001eb150860;Zm00001eb267730	3	Zm00001eb234120;Zm00001eb275080;Zm00001eb206730;Zm00001eb413930;Zm00001eb388620;Zm00001eb149450	6
Biological process	GO:0060627	regulation of vesicle-mediated transport	0.0179519	Zm00001eb330730;Zm00001eb111590;Zm00001eb311920	3	--	0	Zm00001eb330730;Zm00001eb111590;Zm00001eb311920	3
Biological process	GO:0097164	ammonium ion metabolic process	0.0184523	Zm00001eb416690;Zm00001eb208270	2	Zm00001eb416690;Zm00001eb208270	2	--	0
Biological process	GO:0009867	jasmonic acid mediated signaling pathway	0.0186123	Zm00001eb415520;novel.2202;Zm00001eb006000;Zm00001eb346880;Zm00001eb307550;Zm00001eb420440	6	--	0	Zm00001eb415520;novel.2202;Zm00001eb006000;Zm00001eb346880;Zm00001eb307550;Zm00001eb420440	6
Biological process	GO:0051702	biological process involved in interaction with symbiont	0.0199476	Zm00001eb172290;Zm00001eb245520;Zm00001eb052520;Zm00001eb077540;Zm00001eb430040;Zm00001eb080230	6	Zm00001eb052520;Zm00001eb430040	2	Zm00001eb172290;Zm00001eb245520;Zm00001eb077540;Zm00001eb080230	4
Biological process	GO:0055062	phosphate ion homeostasis	0.0203546	Zm00001eb415520;Zm00001eb420440	2	--	0	Zm00001eb415520;Zm00001eb420440	2
Biological process	GO:0072506	trivalent inorganic anion homeostasis	0.0203546	Zm00001eb415520;Zm00001eb420440	2	--	0	Zm00001eb415520;Zm00001eb420440	2
Biological process	GO:0050801	ion homeostasis	0.020422	Zm00001eb415520;novel.1262;Zm00001eb119430;novel.411;Zm00001eb360150;Zm00001eb420440;Zm00001eb381570;Zm00001eb297200;Zm00001eb247810;Zm00001eb211310	10	novel.1262;Zm00001eb119430;novel.411;Zm00001eb381570;Zm00001eb247810	5	Zm00001eb415520;Zm00001eb360150;Zm00001eb420440;Zm00001eb297200;Zm00001eb211310	5
Biological process	GO:0016042	lipid catabolic process	0.0207176	Zm00001eb251960;Zm00001eb249230;Zm00001eb300240;Zm00001eb283860;Zm00001eb228370;Zm00001eb166850;Zm00001eb218680;Zm00001eb184830;Zm00001eb225370;Zm00001eb266650	10	Zm00001eb218680;Zm00001eb184830;Zm00001eb266650	3	Zm00001eb251960;Zm00001eb249230;Zm00001eb300240;Zm00001eb283860;Zm00001eb228370;Zm00001eb166850;Zm00001eb225370	7
Biological process	GO:0016121	carotene catabolic process	0.022335	Zm00001eb300240;Zm00001eb218680	2	Zm00001eb218680	1	Zm00001eb300240	1
Biological process	GO:0046247	terpene catabolic process	0.022335	Zm00001eb300240;Zm00001eb218680	2	Zm00001eb218680	1	Zm00001eb300240	1
Biological process	GO:0120251	hydrocarbon biosynthetic process	0.0228607	Zm00001eb009250;Zm00001eb071090;Zm00001eb073290;Zm00001eb055950	4	--	0	Zm00001eb009250;Zm00001eb071090;Zm00001eb073290;Zm00001eb055950	4
Biological process	GO:0009072	aromatic amino acid family metabolic process	0.0240995	Zm00001eb038070;Zm00001eb100800;Zm00001eb367110;Zm00001eb416690;Zm00001eb203230	5	Zm00001eb416690;Zm00001eb203230	2	Zm00001eb038070;Zm00001eb100800;Zm00001eb367110	3
Biological process	GO:0120253	hydrocarbon catabolic process	0.0243915	Zm00001eb300240;Zm00001eb218680	2	Zm00001eb218680	1	Zm00001eb300240	1
Biological process	GO:0009692	ethylene metabolic process	0.0253358	Zm00001eb009250;Zm00001eb073290;Zm00001eb055950	3	--	0	Zm00001eb009250;Zm00001eb073290;Zm00001eb055950	3
Biological process	GO:0009693	ethylene biosynthetic process	0.0253358	Zm00001eb009250;Zm00001eb073290;Zm00001eb055950	3	--	0	Zm00001eb009250;Zm00001eb073290;Zm00001eb055950	3
Biological process	GO:0043449	cellular alkene metabolic process	0.0253358	Zm00001eb009250;Zm00001eb073290;Zm00001eb055950	3	--	0	Zm00001eb009250;Zm00001eb073290;Zm00001eb055950	3
Biological process	GO:0043450	alkene biosynthetic process	0.0253358	Zm00001eb009250;Zm00001eb073290;Zm00001eb055950	3	--	0	Zm00001eb009250;Zm00001eb073290;Zm00001eb055950	3
Biological process	GO:1900673	olefin metabolic process	0.0253358	Zm00001eb009250;Zm00001eb073290;Zm00001eb055950	3	--	0	Zm00001eb009250;Zm00001eb073290;Zm00001eb055950	3
Biological process	GO:1900674	olefin biosynthetic process	0.0253358	Zm00001eb009250;Zm00001eb073290;Zm00001eb055950	3	--	0	Zm00001eb009250;Zm00001eb073290;Zm00001eb055950	3
Biological process	GO:0071456	cellular response to hypoxia	0.025398	Zm00001eb341630;Zm00001eb160050;Zm00001eb434140;Zm00001eb009250;Zm00001eb358680;Zm00001eb151350	6	--	0	Zm00001eb341630;Zm00001eb160050;Zm00001eb434140;Zm00001eb009250;Zm00001eb358680;Zm00001eb151350	6
Biological process	GO:0036294	cellular response to decreased oxygen levels	0.025938	Zm00001eb341630;Zm00001eb160050;Zm00001eb434140;Zm00001eb009250;Zm00001eb358680;Zm00001eb151350	6	--	0	Zm00001eb341630;Zm00001eb160050;Zm00001eb434140;Zm00001eb009250;Zm00001eb358680;Zm00001eb151350	6
Biological process	GO:0071453	cellular response to oxygen levels	0.025938	Zm00001eb341630;Zm00001eb160050;Zm00001eb434140;Zm00001eb009250;Zm00001eb358680;Zm00001eb151350	6	--	0	Zm00001eb341630;Zm00001eb160050;Zm00001eb434140;Zm00001eb009250;Zm00001eb358680;Zm00001eb151350	6
Biological process	GO:0071395	cellular response to jasmonic acid stimulus	0.0264855	Zm00001eb415520;novel.2202;Zm00001eb006000;Zm00001eb346880;Zm00001eb307550;Zm00001eb420440	6	--	0	Zm00001eb415520;novel.2202;Zm00001eb006000;Zm00001eb346880;Zm00001eb307550;Zm00001eb420440	6
Biological process	GO:0042214	terpene metabolic process	0.0289278	Zm00001eb300240;Zm00001eb071090;Zm00001eb218680	3	Zm00001eb218680	1	Zm00001eb300240;Zm00001eb071090	2
Biological process	GO:0044030	regulation of DNA methylation	0.0289278	Zm00001eb329350;Zm00001eb113970;Zm00001eb329320	3	Zm00001eb113970	1	Zm00001eb329350;Zm00001eb329320	2
Biological process	GO:0071398	cellular response to fatty acid	0.0293384	Zm00001eb415520;novel.2202;Zm00001eb006000;Zm00001eb346880;Zm00001eb307550;Zm00001eb420440	6	--	0	Zm00001eb415520;novel.2202;Zm00001eb006000;Zm00001eb346880;Zm00001eb307550;Zm00001eb420440	6
Biological process	GO:0072593	reactive oxygen species metabolic process	0.0294837	Zm00001eb330530;Zm00001eb333290;Zm00001eb111420;Zm00001eb226370;Zm00001eb333000;Zm00001eb109910;Zm00001eb311920;Zm00001eb348950	8	Zm00001eb226370;Zm00001eb109910	2	Zm00001eb330530;Zm00001eb333290;Zm00001eb111420;Zm00001eb333000;Zm00001eb311920;Zm00001eb348950	6
Biological process	GO:0080135	regulation of cellular response to stress	0.0312892	Zm00001eb415520;Zm00001eb172290;Zm00001eb420440;Zm00001eb430040	4	Zm00001eb430040	1	Zm00001eb415520;Zm00001eb172290;Zm00001eb420440	3
Biological process	GO:0006576	cellular biogenic amine metabolic process	0.0322198	Zm00001eb038070;Zm00001eb100800;Zm00001eb367110;Zm00001eb416690	4	Zm00001eb416690	1	Zm00001eb038070;Zm00001eb100800;Zm00001eb367110	3
Biological process	GO:0009630	gravitropism	0.0322931	Zm00001eb406090;Zm00001eb418460;Zm00001eb241870;Zm00001eb163460;Zm00001eb023350	5	Zm00001eb406090;Zm00001eb241870;Zm00001eb163460;Zm00001eb023350	4	Zm00001eb418460	1
Biological process	GO:0009629	response to gravity	0.0330452	Zm00001eb406090;Zm00001eb418460;Zm00001eb241870;Zm00001eb163460;Zm00001eb023350	5	Zm00001eb406090;Zm00001eb241870;Zm00001eb163460;Zm00001eb023350	4	Zm00001eb418460	1
Biological process	GO:0009809	lignin biosynthetic process	0.0331665	Zm00001eb316920;Zm00001eb374630;Zm00001eb333290;Zm00001eb088800	4	Zm00001eb316920;Zm00001eb374630	2	Zm00001eb333290;Zm00001eb088800	2
Biological process	GO:0001906	cell killing	0.0357502	Zm00001eb096930;Zm00001eb052520	2	Zm00001eb052520	1	Zm00001eb096930	1
Biological process	GO:0009903	chloroplast avoidance movement	0.0357502	Zm00001eb163740;Zm00001eb006320	2	--	0	Zm00001eb163740;Zm00001eb006320	2
Biological process	GO:0031640	killing of cells of another organism	0.0357502	Zm00001eb096930;Zm00001eb052520	2	Zm00001eb052520	1	Zm00001eb096930	1
Biological process	GO:0009606	tropism	0.036307	Zm00001eb406090;Zm00001eb418460;Zm00001eb241870;Zm00001eb163460;Zm00001eb333260;Zm00001eb023350	6	Zm00001eb406090;Zm00001eb241870;Zm00001eb163460;Zm00001eb023350	4	Zm00001eb418460;Zm00001eb333260	2
Biological process	GO:0010411	xyloglucan metabolic process	0.0368749	Zm00001eb341630;Zm00001eb071650;Zm00001eb430420	3	Zm00001eb430420	1	Zm00001eb341630;Zm00001eb071650	2
Biological process	GO:1901371	regulation of leaf morphogenesis	0.0382244	Zm00001eb187340;Zm00001eb187290	2	--	0	Zm00001eb187340;Zm00001eb187290	2
Biological process	GO:0045934	negative regulation of nucleobase-containing compound metabolic process	0.038377	Zm00001eb234120;Zm00001eb275080;Zm00001eb206730;Zm00001eb413930;Zm00001eb388620;Zm00001eb428330;Zm00001eb150860;Zm00001eb267730;Zm00001eb149450	9	Zm00001eb428330;Zm00001eb150860;Zm00001eb267730	3	Zm00001eb234120;Zm00001eb275080;Zm00001eb206730;Zm00001eb413930;Zm00001eb388620;Zm00001eb149450	6
Biological process	GO:0009738	abscisic acid-activated signaling pathway	0.0393381	Zm00001eb286490;Zm00001eb350280;Zm00001eb368340;Zm00001eb425100;Zm00001eb326450;Zm00001eb149570;Zm00001eb360950;Zm00001eb155720;novel.2018;Zm00001eb291540	10	Zm00001eb368340;Zm00001eb326450	2	Zm00001eb286490;Zm00001eb350280;Zm00001eb425100;Zm00001eb149570;Zm00001eb360950;Zm00001eb155720;novel.2018;Zm00001eb291540	8
Biological process	GO:0044106	cellular amine metabolic process	0.0402455	Zm00001eb038070;Zm00001eb100800;Zm00001eb367110;Zm00001eb416690	4	Zm00001eb416690	1	Zm00001eb038070;Zm00001eb100800;Zm00001eb367110	3
Biological process	GO:0002252	immune effector process	0.040762	Zm00001eb243070;Zm00001eb065620	2	--	0	Zm00001eb243070;Zm00001eb065620	2
Biological process	GO:0009691	cytokinin biosynthetic process	0.040762	Zm00001eb160700;Zm00001eb312250	2	Zm00001eb312250	1	Zm00001eb160700	1
Biological process	GO:0009968	negative regulation of signal transduction	0.0419905	Zm00001eb234120;Zm00001eb286490;Zm00001eb206730;Zm00001eb350280;Zm00001eb326450;Zm00001eb013600	6	Zm00001eb326450	1	Zm00001eb234120;Zm00001eb286490;Zm00001eb206730;Zm00001eb350280;Zm00001eb013600	5
Biological process	GO:0010648	negative regulation of cell communication	0.0419905	Zm00001eb234120;Zm00001eb286490;Zm00001eb206730;Zm00001eb350280;Zm00001eb326450;Zm00001eb013600	6	Zm00001eb326450	1	Zm00001eb234120;Zm00001eb286490;Zm00001eb206730;Zm00001eb350280;Zm00001eb013600	5
Biological process	GO:0023057	negative regulation of signaling	0.0419905	Zm00001eb234120;Zm00001eb286490;Zm00001eb206730;Zm00001eb350280;Zm00001eb326450;Zm00001eb013600	6	Zm00001eb326450	1	Zm00001eb234120;Zm00001eb286490;Zm00001eb206730;Zm00001eb350280;Zm00001eb013600	5
Biological process	GO:0072330	monocarboxylic acid biosynthetic process	0.043061	Zm00001eb300240;Zm00001eb396770;Zm00001eb396780;Zm00001eb267640;Zm00001eb396760;Zm00001eb335390;Zm00001eb218680;Zm00001eb396790;Zm00001eb413200	9	Zm00001eb218680;Zm00001eb413200	2	Zm00001eb300240;Zm00001eb396770;Zm00001eb396780;Zm00001eb267640;Zm00001eb396760;Zm00001eb335390;Zm00001eb396790	7
Biological process	GO:0016115	terpenoid catabolic process	0.0433613	Zm00001eb251960;Zm00001eb283860	2	--	0	Zm00001eb251960;Zm00001eb283860	2
Biological process	GO:0034051	negative regulation of plant-type hypersensitive response	0.0433613	Zm00001eb172290;Zm00001eb430040	2	Zm00001eb430040	1	Zm00001eb172290	1
Biological process	GO:0009850	auxin metabolic process	0.0435223	Zm00001eb396770;Zm00001eb396780;Zm00001eb396760;Zm00001eb396790	4	--	0	Zm00001eb396770;Zm00001eb396780;Zm00001eb396760;Zm00001eb396790	4
Biological process	GO:0010044	response to aluminum ion	0.0460207	novel.1262;Zm00001eb063930	2	novel.1262	1	Zm00001eb063930	1
Biological process	GO:1900618	regulation of shoot system morphogenesis	0.0460207	Zm00001eb187340;Zm00001eb187290	2	--	0	Zm00001eb187340;Zm00001eb187290	2
Biological process	GO:0001666	response to hypoxia	0.0473993	Zm00001eb341630;Zm00001eb160050;Zm00001eb434140;Zm00001eb009250;Zm00001eb358680;Zm00001eb151350	6	--	0	Zm00001eb341630;Zm00001eb160050;Zm00001eb434140;Zm00001eb009250;Zm00001eb358680;Zm00001eb151350	6
Biological process	GO:0009833	plant-type primary cell wall biogenesis	0.0487384	Zm00001eb323760;Zm00001eb040830	2	Zm00001eb323760	1	Zm00001eb040830	1
Biological process	GO:0010243	response to organonitrogen compound	0.0503638	Zm00001eb234120;Zm00001eb275080;Zm00001eb206730;novel.851;Zm00001eb187340;Zm00001eb388620;Zm00001eb187290	7	--	0	Zm00001eb234120;Zm00001eb275080;Zm00001eb206730;novel.851;Zm00001eb187340;Zm00001eb388620;Zm00001eb187290	7
Biological process	GO:1905421	regulation of plant organ morphogenesis	0.0506602	Zm00001eb187340;Zm00001eb350150;Zm00001eb187290	3	--	0	Zm00001eb187340;Zm00001eb350150;Zm00001eb187290	3
Biological process	GO:0042180	cellular ketone metabolic process	0.0513835	Zm00001eb038070;Zm00001eb100800;Zm00001eb367110;Zm00001eb413220;Zm00001eb335390	5	--	0	Zm00001eb038070;Zm00001eb100800;Zm00001eb367110;Zm00001eb413220;Zm00001eb335390	5
Biological process	GO:0010363	regulation of plant-type hypersensitive response	0.051513	Zm00001eb172290;Zm00001eb430040	2	Zm00001eb430040	1	Zm00001eb172290	1
Biological process	GO:0016119	carotene metabolic process	0.051513	Zm00001eb300240;Zm00001eb218680	2	Zm00001eb218680	1	Zm00001eb300240	1
Biological process	GO:0009626	plant-type hypersensitive response	0.0523794	Zm00001eb172290;Zm00001eb245520;Zm00001eb077540;Zm00001eb430040;Zm00001eb080230	5	Zm00001eb430040	1	Zm00001eb172290;Zm00001eb245520;Zm00001eb077540;Zm00001eb080230	4
Biological process	GO:0034050	programmed cell death induced by symbiont	0.0523794	Zm00001eb172290;Zm00001eb245520;Zm00001eb077540;Zm00001eb430040;Zm00001eb080230	5	Zm00001eb430040	1	Zm00001eb172290;Zm00001eb245520;Zm00001eb077540;Zm00001eb080230	4
Biological process	GO:0009740	gibberellic acid mediated signaling pathway	0.0580823	Zm00001eb234120;Zm00001eb286490;Zm00001eb206730;Zm00001eb350280	4	--	0	Zm00001eb234120;Zm00001eb286490;Zm00001eb206730;Zm00001eb350280	4
Biological process	GO:0055081	anion homeostasis	0.0601616	Zm00001eb415520;Zm00001eb420440	2	--	0	Zm00001eb415520;Zm00001eb420440	2
Biological process	GO:0010476	gibberellin mediated signaling pathway	0.060733	Zm00001eb234120;Zm00001eb286490;Zm00001eb206730;Zm00001eb350280	4	--	0	Zm00001eb234120;Zm00001eb286490;Zm00001eb206730;Zm00001eb350280	4
Biological process	GO:0036293	response to decreased oxygen levels	0.0613183	Zm00001eb341630;Zm00001eb160050;Zm00001eb434140;Zm00001eb009250;Zm00001eb358680;Zm00001eb151350	6	--	0	Zm00001eb341630;Zm00001eb160050;Zm00001eb434140;Zm00001eb009250;Zm00001eb358680;Zm00001eb151350	6
Biological process	GO:0001709	cell fate determination	0.0631478	Zm00001eb428330;Zm00001eb150860	2	Zm00001eb428330;Zm00001eb150860	2	--	0
Biological process	GO:0070482	response to oxygen levels	0.0632118	Zm00001eb341630;Zm00001eb160050;Zm00001eb434140;Zm00001eb009250;Zm00001eb358680;Zm00001eb151350	6	--	0	Zm00001eb341630;Zm00001eb160050;Zm00001eb434140;Zm00001eb009250;Zm00001eb358680;Zm00001eb151350	6
Biological process	GO:0032103	positive regulation of response to external stimulus	0.0640748	Zm00001eb415520;Zm00001eb309760;Zm00001eb245520;Zm00001eb420440;Zm00001eb080230	5	--	0	Zm00001eb415520;Zm00001eb309760;Zm00001eb245520;Zm00001eb420440;Zm00001eb080230	5
Biological process	GO:0098771	inorganic ion homeostasis	0.0642424	Zm00001eb415520;novel.1262;novel.411;Zm00001eb360150;Zm00001eb420440;Zm00001eb381570;Zm00001eb247810;Zm00001eb211310	8	novel.1262;novel.411;Zm00001eb381570;Zm00001eb247810	4	Zm00001eb415520;Zm00001eb360150;Zm00001eb420440;Zm00001eb211310	4
Biological process	GO:0055082	cellular chemical homeostasis	0.066116	Zm00001eb119430;Zm00001eb360150;Zm00001eb381570;Zm00001eb297200;Zm00001eb350600;Zm00001eb211310	6	Zm00001eb119430;Zm00001eb381570;Zm00001eb350600	3	Zm00001eb360150;Zm00001eb297200;Zm00001eb211310	3
Biological process	GO:0045087	innate immune response	0.0662974	Zm00001eb275080;Zm00001eb172290;Zm00001eb245520;Zm00001eb319700;Zm00001eb373370;Zm00001eb388620;Zm00001eb077540;Zm00001eb430040;Zm00001eb080230	9	Zm00001eb430040	1	Zm00001eb275080;Zm00001eb172290;Zm00001eb245520;Zm00001eb319700;Zm00001eb373370;Zm00001eb388620;Zm00001eb077540;Zm00001eb080230	8
Biological process	GO:1901698	response to nitrogen compound	0.0665719	Zm00001eb234120;Zm00001eb275080;Zm00001eb206730;novel.851;Zm00001eb187340;Zm00001eb388620;Zm00001eb425100;Zm00001eb187290	8	--	0	Zm00001eb234120;Zm00001eb275080;Zm00001eb206730;novel.851;Zm00001eb187340;Zm00001eb388620;Zm00001eb425100;Zm00001eb187290	8
Biological process	GO:1901136	carbohydrate derivative catabolic process	0.0665816	Zm00001eb047940;Zm00001eb032010;Zm00001eb272090	3	Zm00001eb272090	1	Zm00001eb047940;Zm00001eb032010	2
Biological process	GO:2000242	negative regulation of reproductive process	0.0676354	Zm00001eb168040;Zm00001eb259000;Zm00001eb181410;Zm00001eb230840	4	Zm00001eb230840	1	Zm00001eb168040;Zm00001eb259000;Zm00001eb181410	3
Biological process	GO:0006026	aminoglycan catabolic process	0.0692661	Zm00001eb047940;Zm00001eb272090	2	Zm00001eb272090	1	Zm00001eb047940	1
Biological process	GO:0006030	chitin metabolic process	0.0692661	Zm00001eb047940;Zm00001eb272090	2	Zm00001eb272090	1	Zm00001eb047940	1
Biological process	GO:0006032	chitin catabolic process	0.0692661	Zm00001eb047940;Zm00001eb272090	2	Zm00001eb272090	1	Zm00001eb047940	1
Biological process	GO:0046348	amino sugar catabolic process	0.0692661	Zm00001eb047940;Zm00001eb272090	2	Zm00001eb272090	1	Zm00001eb047940	1
Biological process	GO:1901072	glucosamine-containing compound catabolic process	0.0692661	Zm00001eb047940;Zm00001eb272090	2	Zm00001eb272090	1	Zm00001eb047940	1
Biological process	GO:0044282	small molecule catabolic process	0.0722085	Zm00001eb251960;Zm00001eb283860;Zm00001eb032010;Zm00001eb109370;Zm00001eb367110;Zm00001eb413220;Zm00001eb311920;Zm00001eb203230	8	Zm00001eb109370;Zm00001eb203230	2	Zm00001eb251960;Zm00001eb283860;Zm00001eb032010;Zm00001eb367110;Zm00001eb413220;Zm00001eb311920	6
Biological process	GO:0009827	plant-type cell wall modification	0.0755696	Zm00001eb071650;Zm00001eb356620	2	Zm00001eb356620	1	Zm00001eb071650	1
Biological process	GO:0009808	lignin metabolic process	0.0764299	Zm00001eb316920;Zm00001eb374630;Zm00001eb333290;Zm00001eb088800	4	Zm00001eb316920;Zm00001eb374630	2	Zm00001eb333290;Zm00001eb088800	2
Biological process	GO:1900150	regulation of defense response to fungus	0.0764299	Zm00001eb275080;Zm00001eb330730;Zm00001eb111590;Zm00001eb388620	4	--	0	Zm00001eb275080;Zm00001eb330730;Zm00001eb111590;Zm00001eb388620	4
Biological process	GO:0009699	phenylpropanoid biosynthetic process	0.0774224	Zm00001eb316920;Zm00001eb374630;Zm00001eb333290;Zm00001eb197310;Zm00001eb088800;Zm00001eb145860	6	Zm00001eb316920;Zm00001eb374630;Zm00001eb145860	3	Zm00001eb333290;Zm00001eb197310;Zm00001eb088800	3
Biological process	GO:0010928	regulation of auxin mediated signaling pathway	0.0783101	Zm00001eb038070;Zm00001eb100800;Zm00001eb234690	3	--	0	Zm00001eb038070;Zm00001eb100800;Zm00001eb234690	3
Biological process	GO:0071370	cellular response to gibberellin stimulus	0.0810325	Zm00001eb234120;Zm00001eb286490;Zm00001eb206730;Zm00001eb350280	4	--	0	Zm00001eb234120;Zm00001eb286490;Zm00001eb206730;Zm00001eb350280	4
Biological process	GO:0009902	chloroplast relocation	0.0820472	Zm00001eb163740;Zm00001eb006320	2	--	0	Zm00001eb163740;Zm00001eb006320	2
Biological process	GO:0051667	establishment of plastid localization	0.0820472	Zm00001eb163740;Zm00001eb006320	2	--	0	Zm00001eb163740;Zm00001eb006320	2
Biological process	GO:1901071	glucosamine-containing compound metabolic process	0.0820472	Zm00001eb047940;Zm00001eb272090	2	Zm00001eb272090	1	Zm00001eb047940	1
Biological process	GO:0002238	response to molecule of fungal origin	0.085348	Zm00001eb234120;Zm00001eb206730	2	--	0	Zm00001eb234120;Zm00001eb206730	2
Biological process	GO:0010218	response to far red light	0.0886883	Zm00001eb235510;Zm00001eb023350	2	Zm00001eb023350	1	Zm00001eb235510	1
Biological process	GO:0010540	basipetal auxin transport	0.0886883	Zm00001eb406090;Zm00001eb163460	2	Zm00001eb406090;Zm00001eb163460	2	--	0
Biological process	GO:0044403	biological process involved in symbiotic interaction	0.089754	Zm00001eb172290;Zm00001eb245520;Zm00001eb052520;Zm00001eb077540;Zm00001eb430040;Zm00001eb080230	6	Zm00001eb052520;Zm00001eb430040	2	Zm00001eb172290;Zm00001eb245520;Zm00001eb077540;Zm00001eb080230	4
Biological process	GO:0048581	negative regulation of post-embryonic development	0.0906379	Zm00001eb023350;Zm00001eb259000;Zm00001eb181410;Zm00001eb230840	4	Zm00001eb023350;Zm00001eb230840	2	Zm00001eb259000;Zm00001eb181410	2
Biological process	GO:0000281	mitotic cytokinesis	0.092067	Zm00001eb323760;Zm00001eb040830	2	Zm00001eb323760	1	Zm00001eb040830	1
Biological process	GO:0046189	phenol-containing compound biosynthetic process	0.092067	Zm00001eb335390;Zm00001eb416690	2	Zm00001eb416690	1	Zm00001eb335390	1
Biological process	GO:0010074	maintenance of meristem identity	0.0930414	Zm00001eb428330;Zm00001eb150860;Zm00001eb101560	3	Zm00001eb428330;Zm00001eb150860;Zm00001eb101560	3	--	0
Biological process	GO:0043069	negative regulation of programmed cell death	0.0954826	Zm00001eb172290;Zm00001eb430040	2	Zm00001eb430040	1	Zm00001eb172290	1
Biological process	GO:0055065	metal ion homeostasis	0.0969061	novel.1262;novel.411;Zm00001eb360150;Zm00001eb381570;Zm00001eb247810;Zm00001eb211310	6	novel.1262;novel.411;Zm00001eb381570;Zm00001eb247810	4	Zm00001eb360150;Zm00001eb211310	2
Biological process	GO:0055076	transition metal ion homeostasis	0.0973308	novel.411;Zm00001eb360150;Zm00001eb247810;Zm00001eb211310	4	novel.411;Zm00001eb247810	2	Zm00001eb360150;Zm00001eb211310	2
Biological process	GO:0006305	DNA alkylation	0.0974462	Zm00001eb329350;Zm00001eb113970;Zm00001eb329320	3	Zm00001eb113970	1	Zm00001eb329350;Zm00001eb329320	2
Biological process	GO:0006306	DNA methylation	0.0974462	Zm00001eb329350;Zm00001eb113970;Zm00001eb329320	3	Zm00001eb113970	1	Zm00001eb329350;Zm00001eb329320	2
Biological process	GO:0006873	cellular ion homeostasis	0.0984422	Zm00001eb119430;Zm00001eb360150;Zm00001eb381570;Zm00001eb297200;Zm00001eb211310	5	Zm00001eb119430;Zm00001eb381570	2	Zm00001eb360150;Zm00001eb297200;Zm00001eb211310	3
Biological process	GO:0006022	aminoglycan metabolic process	0.0989341	Zm00001eb047940;Zm00001eb272090	2	Zm00001eb272090	1	Zm00001eb047940	1
Biological process	GO:0000289	nuclear-transcribed mRNA poly(A) tail shortening	0.10242	Zm00001eb065660;novel.451	2	--	0	Zm00001eb065660;novel.451	2
Biological process	GO:0009637	response to blue light	0.104209	Zm00001eb163740;Zm00001eb333260;Zm00001eb023350	3	Zm00001eb023350	1	Zm00001eb163740;Zm00001eb333260	2
Biological process	GO:0090332	stomatal closure	0.104209	Zm00001eb343470;Zm00001eb406090;Zm00001eb163460	3	Zm00001eb343470;Zm00001eb406090;Zm00001eb163460	3	--	0
Biological process	GO:0098754	detoxification	0.104248	novel.1262;Zm00001eb106010;Zm00001eb343090;Zm00001eb208270	4	novel.1262;Zm00001eb208270	2	Zm00001eb106010;Zm00001eb343090	2
Biological process	GO:0006569	tryptophan catabolic process	0.105386	Zm00001eb367110	1	--	0	Zm00001eb367110	1
Biological process	GO:0006577	amino-acid betaine metabolic process	0.105386	Zm00001eb208270	1	Zm00001eb208270	1	--	0
Biological process	GO:0006578	amino-acid betaine biosynthetic process	0.105386	Zm00001eb208270	1	Zm00001eb208270	1	--	0
Biological process	GO:0016045	detection of bacterium	0.105386	Zm00001eb077540	1	--	0	Zm00001eb077540	1
Biological process	GO:0019285	glycine betaine biosynthetic process from choline	0.105386	Zm00001eb208270	1	Zm00001eb208270	1	--	0
Biological process	GO:0031455	glycine betaine metabolic process	0.105386	Zm00001eb208270	1	Zm00001eb208270	1	--	0
Biological process	GO:0031456	glycine betaine biosynthetic process	0.105386	Zm00001eb208270	1	Zm00001eb208270	1	--	0
Biological process	GO:0035821	modulation of process of another organism	0.105386	Zm00001eb052520	1	Zm00001eb052520	1	--	0
Biological process	GO:0042182	ketone catabolic process	0.105386	Zm00001eb413220	1	--	0	Zm00001eb413220	1
Biological process	GO:0042436	indole-containing compound catabolic process	0.105386	Zm00001eb367110	1	--	0	Zm00001eb367110	1
Biological process	GO:0098543	detection of other organism	0.105386	Zm00001eb077540	1	--	0	Zm00001eb077540	1
Biological process	GO:1901162	primary amino compound biosynthetic process	0.105386	Zm00001eb416690	1	Zm00001eb416690	1	--	0
Biological process	GO:0009074	aromatic amino acid family catabolic process	0.10594	Zm00001eb367110;Zm00001eb203230	2	Zm00001eb203230	1	Zm00001eb367110	1
Biological process	GO:1990748	cellular detoxification	0.10594	novel.1262;Zm00001eb208270	2	novel.1262;Zm00001eb208270	2	--	0
Biological process	GO:0015074	DNA integration	0.108817	novel.1612;novel.67;novel.666	3	--	0	novel.1612;novel.67;novel.666	3
Biological process	GO:0010565	regulation of cellular ketone metabolic process	0.111151	Zm00001eb038070;Zm00001eb100800;Zm00001eb335390	3	--	0	Zm00001eb038070;Zm00001eb100800;Zm00001eb335390	3
Biological process	GO:0009910	negative regulation of flower development	0.113074	Zm00001eb259000;Zm00001eb181410	2	--	0	Zm00001eb259000;Zm00001eb181410	2
Biological process	GO:0009636	response to toxic substance	0.113127	novel.1262;Zm00001eb106010;Zm00001eb343090;novel.913;Zm00001eb208270	5	novel.1262;novel.913;Zm00001eb208270	3	Zm00001eb106010;Zm00001eb343090	2
Biological process	GO:0019725	cellular homeostasis	0.114734	Zm00001eb119430;Zm00001eb360150;Zm00001eb381570;Zm00001eb297200;Zm00001eb350600;Zm00001eb211310	6	Zm00001eb119430;Zm00001eb381570;Zm00001eb350600	3	Zm00001eb360150;Zm00001eb297200;Zm00001eb211310	3
Biological process	GO:0002100	tRNA wobble adenosine to inosine editing	0.115295	Zm00001eb032010	1	--	0	Zm00001eb032010	1
Biological process	GO:0048259	regulation of receptor-mediated endocytosis	0.115295	Zm00001eb311920	1	--	0	Zm00001eb311920	1
Biological process	GO:0051554	flavonol metabolic process	0.115295	novel.484	1	--	0	novel.484	1
Biological process	GO:0051555	flavonol biosynthetic process	0.115295	novel.484	1	--	0	novel.484	1
Biological process	GO:0051973	positive regulation of telomerase activity	0.115295	Zm00001eb425100	1	--	0	Zm00001eb425100	1
Biological process	GO:2000369	regulation of clathrin-dependent endocytosis	0.115295	Zm00001eb311920	1	--	0	Zm00001eb311920	1
Biological process	GO:2000573	positive regulation of DNA biosynthetic process	0.115295	Zm00001eb425100	1	--	0	Zm00001eb425100	1
Biological process	GO:0009863	salicylic acid mediated signaling pathway	0.115875	Zm00001eb330730;Zm00001eb373370;Zm00001eb111590	3	--	0	Zm00001eb330730;Zm00001eb373370;Zm00001eb111590	3
Biological process	GO:0045165	cell fate commitment	0.115875	Zm00001eb428330;Zm00001eb300570;Zm00001eb150860	3	Zm00001eb428330;Zm00001eb300570;Zm00001eb150860	3	--	0
Biological process	GO:0097237	cellular response to toxic substance	0.116687	novel.1262;Zm00001eb208270	2	novel.1262;Zm00001eb208270	2	--	0
Biological process	GO:0009690	cytokinin metabolic process	0.120329	Zm00001eb160700;Zm00001eb312250	2	Zm00001eb312250	1	Zm00001eb160700	1
Biological process	GO:0040029	epigenetic regulation of gene expression	0.122415	novel.897;novel.696;Zm00001eb428330;Zm00001eb150860;Zm00001eb113970	5	Zm00001eb428330;Zm00001eb150860;Zm00001eb113970	3	novel.897;novel.696	2
Biological process	GO:0009788	negative regulation of abscisic acid-activated signaling pathway	0.1231	Zm00001eb286490;Zm00001eb350280;Zm00001eb326450	3	Zm00001eb326450	1	Zm00001eb286490;Zm00001eb350280	2
Biological process	GO:1901420	negative regulation of response to alcohol	0.1231	Zm00001eb286490;Zm00001eb350280;Zm00001eb326450	3	Zm00001eb326450	1	Zm00001eb286490;Zm00001eb350280	2
Biological process	GO:1905958	negative regulation of cellular response to alcohol	0.1231	Zm00001eb286490;Zm00001eb350280;Zm00001eb326450	3	Zm00001eb326450	1	Zm00001eb286490;Zm00001eb350280	2
Biological process	GO:0010104	regulation of ethylene-activated signaling pathway	0.123999	Zm00001eb331080;Zm00001eb013600	2	--	0	Zm00001eb331080;Zm00001eb013600	2
Biological process	GO:0070297	regulation of phosphorelay signal transduction system	0.123999	Zm00001eb331080;Zm00001eb013600	2	--	0	Zm00001eb331080;Zm00001eb013600	2
Biological process	GO:0006572	tyrosine catabolic process	0.125096	Zm00001eb203230	1	Zm00001eb203230	1	--	0
Biological process	GO:0009595	detection of biotic stimulus	0.125096	Zm00001eb077540	1	--	0	Zm00001eb077540	1
Biological process	GO:0019695	choline metabolic process	0.125096	Zm00001eb208270	1	Zm00001eb208270	1	--	0
Biological process	GO:0051290	protein heterotetramerization	0.125096	novel.2063	1	--	0	novel.2063	1
Biological process	GO:0051972	regulation of telomerase activity	0.125096	Zm00001eb425100	1	--	0	Zm00001eb425100	1
Biological process	GO:0071108	protein K48-linked deubiquitination	0.125096	Zm00001eb357270	1	Zm00001eb357270	1	--	0
Biological process	GO:0098581	detection of external biotic stimulus	0.125096	Zm00001eb077540	1	--	0	Zm00001eb077540	1
Biological process	GO:1901160	primary amino compound metabolic process	0.125096	Zm00001eb416690	1	Zm00001eb416690	1	--	0
Biological process	GO:0071446	cellular response to salicylic acid stimulus	0.125544	Zm00001eb330730;Zm00001eb373370;Zm00001eb111590	3	--	0	Zm00001eb330730;Zm00001eb373370;Zm00001eb111590	3
Biological process	GO:0010038	response to metal ion	0.125588	novel.1262;Zm00001eb063930;Zm00001eb137930;Zm00001eb131500;Zm00001eb184830	5	novel.1262;Zm00001eb137930;Zm00001eb184830	3	Zm00001eb063930;Zm00001eb131500	2
Biological process	GO:0010119	regulation of stomatal movement	0.126282	Zm00001eb406090;Zm00001eb357290;Zm00001eb414870;Zm00001eb163460	4	Zm00001eb406090;Zm00001eb163460	2	Zm00001eb357290;Zm00001eb414870	2
Biological process	GO:0006406	mRNA export from nucleus	0.127695	Zm00001eb329350;Zm00001eb329320	2	--	0	Zm00001eb329350;Zm00001eb329320	2
Biological process	GO:0044728	DNA methylation or demethylation	0.130485	Zm00001eb329350;Zm00001eb113970;Zm00001eb329320	3	Zm00001eb113970	1	Zm00001eb329350;Zm00001eb329320	2
Biological process	GO:0009438	methylglyoxal metabolic process	0.134787	Zm00001eb413220	1	--	0	Zm00001eb413220	1
Biological process	GO:0010226	response to lithium ion	0.134787	Zm00001eb184830	1	Zm00001eb184830	1	--	0
Biological process	GO:0097501	stress response to metal ion	0.134787	novel.1262	1	novel.1262	1	--	0
Biological process	GO:2000278	regulation of DNA biosynthetic process	0.134787	Zm00001eb425100	1	--	0	Zm00001eb425100	1
Biological process	GO:0042908	xenobiotic transport	0.135164	Zm00001eb106010;Zm00001eb343090	2	--	0	Zm00001eb106010;Zm00001eb343090	2
Biological process	GO:0043928	exonucleolytic catabolism of deadenylated mRNA	0.135164	Zm00001eb065660;novel.451	2	--	0	Zm00001eb065660;novel.451	2
Biological process	GO:0046618	xenobiotic export from cell	0.135164	Zm00001eb106010;Zm00001eb343090	2	--	0	Zm00001eb106010;Zm00001eb343090	2
Biological process	GO:1990961	xenobiotic detoxification by transmembrane export across the plasma membrane	0.135164	Zm00001eb106010;Zm00001eb343090	2	--	0	Zm00001eb106010;Zm00001eb343090	2
Biological process	GO:0019827	stem cell population maintenance	0.138022	Zm00001eb428330;Zm00001eb150860;Zm00001eb101560	3	Zm00001eb428330;Zm00001eb150860;Zm00001eb101560	3	--	0
Biological process	GO:0098727	maintenance of cell number	0.138022	Zm00001eb428330;Zm00001eb150860;Zm00001eb101560	3	Zm00001eb428330;Zm00001eb150860;Zm00001eb101560	3	--	0
Biological process	GO:0071407	cellular response to organic cyclic compound	0.139895	Zm00001eb330730;Zm00001eb187340;Zm00001eb373370;Zm00001eb111590;Zm00001eb005500;Zm00001eb187290	6	Zm00001eb005500	1	Zm00001eb330730;Zm00001eb187340;Zm00001eb373370;Zm00001eb111590;Zm00001eb187290	5
Biological process	GO:0006304	DNA modification	0.140566	Zm00001eb329350;Zm00001eb113970;Zm00001eb329320	3	Zm00001eb113970	1	Zm00001eb329350;Zm00001eb329320	2
Biological process	GO:0007623	circadian rhythm	0.141364	Zm00001eb316920;Zm00001eb374630;Zm00001eb425100;Zm00001eb390860;Zm00001eb109910;Zm00001eb040810	6	Zm00001eb316920;Zm00001eb374630;Zm00001eb390860;Zm00001eb109910	4	Zm00001eb425100;Zm00001eb040810	2
Biological process	GO:0044550	secondary metabolite biosynthetic process	0.142382	Zm00001eb316920;Zm00001eb374630;Zm00001eb333290;Zm00001eb197310;Zm00001eb009250;Zm00001eb088800;Zm00001eb145860	7	Zm00001eb316920;Zm00001eb374630;Zm00001eb145860	3	Zm00001eb333290;Zm00001eb197310;Zm00001eb009250;Zm00001eb088800	4
Biological process	GO:0009734	auxin-activated signaling pathway	0.142677	Zm00001eb038070;Zm00001eb301590;Zm00001eb100800;Zm00001eb241870;Zm00001eb425100;Zm00001eb234690;Zm00001eb052590;novel.190	8	Zm00001eb241870	1	Zm00001eb038070;Zm00001eb301590;Zm00001eb100800;Zm00001eb425100;Zm00001eb234690;Zm00001eb052590;novel.190	7
Biological process	GO:0046164	alcohol catabolic process	0.142728	Zm00001eb251960;Zm00001eb311920	2	--	0	Zm00001eb251960;Zm00001eb311920	2
Biological process	GO:0017148	negative regulation of translation	0.143983	Zm00001eb065660;Zm00001eb326540;Zm00001eb096930;novel.451	4	--	0	Zm00001eb065660;Zm00001eb326540;Zm00001eb096930;novel.451	4
Biological process	GO:0010500	transmitting tissue development	0.144372	Zm00001eb100380	1	--	0	Zm00001eb100380	1
Biological process	GO:0051028	mRNA transport	0.146007	Zm00001eb329350;novel.296;Zm00001eb329320;Zm00001eb029370	4	novel.296;Zm00001eb029370	2	Zm00001eb329350;Zm00001eb329320	2
Biological process	GO:0051241	negative regulation of multicellular organismal process	0.148043	Zm00001eb023350;Zm00001eb259000;Zm00001eb181410;Zm00001eb230840	4	Zm00001eb023350;Zm00001eb230840	2	Zm00001eb259000;Zm00001eb181410	2
Biological process	GO:0034249	negative regulation of cellular amide metabolic process	0.150089	Zm00001eb065660;Zm00001eb326540;Zm00001eb096930;novel.451	4	--	0	Zm00001eb065660;Zm00001eb326540;Zm00001eb096930;novel.451	4
Biological process	GO:0051052	regulation of DNA metabolic process	0.150089	Zm00001eb329350;Zm00001eb425100;Zm00001eb113970;Zm00001eb329320	4	Zm00001eb113970	1	Zm00001eb329350;Zm00001eb425100;Zm00001eb329320	3
Biological process	GO:0002757	immune response-activating signal transduction	0.150379	Zm00001eb245520;Zm00001eb080230	2	--	0	Zm00001eb245520;Zm00001eb080230	2
Biological process	GO:0002758	innate immune response-activating signal transduction	0.150379	Zm00001eb245520;Zm00001eb080230	2	--	0	Zm00001eb245520;Zm00001eb080230	2
Biological process	GO:0006040	amino sugar metabolic process	0.150379	Zm00001eb047940;Zm00001eb272090	2	Zm00001eb272090	1	Zm00001eb047940	1
Biological process	GO:0016036	cellular response to phosphate starvation	0.150379	Zm00001eb415520;Zm00001eb420440	2	--	0	Zm00001eb415520;Zm00001eb420440	2
Biological process	GO:0019750	chloroplast localization	0.150379	Zm00001eb163740;Zm00001eb006320	2	--	0	Zm00001eb163740;Zm00001eb006320	2
Biological process	GO:2000112	regulation of cellular macromolecule biosynthetic process	0.153166	Zm00001eb065660;Zm00001eb326540;Zm00001eb096930;Zm00001eb373370;novel.451;Zm00001eb109910;Zm00001eb311340	7	Zm00001eb109910;Zm00001eb311340	2	Zm00001eb065660;Zm00001eb326540;Zm00001eb096930;Zm00001eb373370;novel.451	5
Biological process	GO:0006382	adenosine to inosine editing	0.153852	Zm00001eb032010	1	--	0	Zm00001eb032010	1
Biological process	GO:0006524	alanine catabolic process	0.153852	Zm00001eb109370	1	Zm00001eb109370	1	--	0
Biological process	GO:0009080	pyruvate family amino acid catabolic process	0.153852	Zm00001eb109370	1	Zm00001eb109370	1	--	0
Biological process	GO:0010187	negative regulation of seed germination	0.153852	Zm00001eb023350	1	Zm00001eb023350	1	--	0
Biological process	GO:0042851	L-alanine metabolic process	0.153852	Zm00001eb109370	1	Zm00001eb109370	1	--	0
Biological process	GO:0042853	L-alanine catabolic process	0.153852	Zm00001eb109370	1	Zm00001eb109370	1	--	0
Biological process	GO:0046471	phosphatidylglycerol metabolic process	0.153852	Zm00001eb413200	1	Zm00001eb413200	1	--	0
Biological process	GO:0048462	carpel formation	0.153852	Zm00001eb100380	1	--	0	Zm00001eb100380	1
Biological process	GO:0051552	flavone metabolic process	0.153852	novel.484	1	--	0	novel.484	1
Biological process	GO:0051553	flavone biosynthetic process	0.153852	novel.484	1	--	0	novel.484	1
Biological process	GO:0044242	cellular lipid catabolic process	0.154215	Zm00001eb251960;Zm00001eb300240;Zm00001eb283860;Zm00001eb218680	4	Zm00001eb218680	1	Zm00001eb251960;Zm00001eb300240;Zm00001eb283860	3
Biological process	GO:0010597	green leaf volatile biosynthetic process	0.154235	Zm00001eb316920;Zm00001eb374630	2	Zm00001eb316920;Zm00001eb374630	2	--	0
Biological process	GO:0019372	lipoxygenase pathway	0.154235	Zm00001eb316920;Zm00001eb374630	2	Zm00001eb316920;Zm00001eb374630	2	--	0
Biological process	GO:0051644	plastid localization	0.154235	Zm00001eb163740;Zm00001eb006320	2	--	0	Zm00001eb163740;Zm00001eb006320	2
Biological process	GO:0051049	regulation of transport	0.157542	Zm00001eb330730;Zm00001eb111590;Zm00001eb361550;Zm00001eb100380;Zm00001eb311920	5	Zm00001eb361550	1	Zm00001eb330730;Zm00001eb111590;Zm00001eb100380;Zm00001eb311920	4
Biological process	GO:0051093	negative regulation of developmental process	0.157542	Zm00001eb168040;Zm00001eb023350;Zm00001eb259000;Zm00001eb181410;Zm00001eb230840	5	Zm00001eb023350;Zm00001eb230840	2	Zm00001eb168040;Zm00001eb259000;Zm00001eb181410	3
Biological process	GO:0061640	cytoskeleton-dependent cytokinesis	0.15811	Zm00001eb323760;Zm00001eb040830	2	Zm00001eb323760	1	Zm00001eb040830	1
Biological process	GO:2000113	negative regulation of cellular macromolecule biosynthetic process	0.160483	Zm00001eb065660;Zm00001eb326540;Zm00001eb096930;novel.451	4	--	0	Zm00001eb065660;Zm00001eb326540;Zm00001eb096930;novel.451	4
Biological process	GO:0045824	negative regulation of innate immune response	0.162003	Zm00001eb172290;Zm00001eb430040	2	Zm00001eb430040	1	Zm00001eb172290	1
Biological process	GO:0060548	negative regulation of cell death	0.162003	Zm00001eb172290;Zm00001eb430040	2	Zm00001eb430040	1	Zm00001eb172290	1
Biological process	GO:0006522	alanine metabolic process	0.163226	Zm00001eb109370	1	Zm00001eb109370	1	--	0
Biological process	GO:0009078	pyruvate family amino acid metabolic process	0.163226	Zm00001eb109370	1	Zm00001eb109370	1	--	0
Biological process	GO:0009831	plant-type cell wall modification involved in multidimensional cell growth	0.163226	Zm00001eb356620	1	Zm00001eb356620	1	--	0
Biological process	GO:0042547	cell wall modification involved in multidimensional cell growth	0.163226	Zm00001eb356620	1	Zm00001eb356620	1	--	0
Biological process	GO:0042752	regulation of circadian rhythm	0.164144	Zm00001eb390860;Zm00001eb109910;Zm00001eb040810	3	Zm00001eb390860;Zm00001eb109910	2	Zm00001eb040810	1
Biological process	GO:0046916	cellular transition metal ion homeostasis	0.16984	Zm00001eb360150;Zm00001eb211310	2	--	0	Zm00001eb360150;Zm00001eb211310	2
Biological process	GO:1901616	organic hydroxy compound catabolic process	0.16984	Zm00001eb251960;Zm00001eb311920	2	--	0	Zm00001eb251960;Zm00001eb311920	2
Biological process	GO:0010118	stomatal movement	0.171907	Zm00001eb343470;Zm00001eb406090;Zm00001eb357290;Zm00001eb414870;Zm00001eb163460	5	Zm00001eb343470;Zm00001eb406090;Zm00001eb163460	3	Zm00001eb357290;Zm00001eb414870	2
Biological process	GO:0009566	fertilization	0.172497	Zm00001eb023350	1	Zm00001eb023350	1	--	0
Biological process	GO:0009567	double fertilization forming a zygote and endosperm	0.172497	Zm00001eb023350	1	Zm00001eb023350	1	--	0
Biological process	GO:0009704	de-etiolation	0.172497	Zm00001eb023350	1	Zm00001eb023350	1	--	0
Biological process	GO:0018107	peptidyl-threonine phosphorylation	0.172497	Zm00001eb368340	1	Zm00001eb368340	1	--	0
Biological process	GO:0018210	peptidyl-threonine modification	0.172497	Zm00001eb368340	1	Zm00001eb368340	1	--	0
Biological process	GO:0035725	sodium ion transmembrane transport	0.172497	Zm00001eb381570	1	Zm00001eb381570	1	--	0
Biological process	GO:0090708	specification of plant organ axis polarity	0.172497	Zm00001eb350150	1	--	0	Zm00001eb350150	1
Biological process	GO:0098719	sodium ion import across plasma membrane	0.172497	Zm00001eb381570	1	Zm00001eb381570	1	--	0
Biological process	GO:0048511	rhythmic process	0.177024	Zm00001eb316920;Zm00001eb374630;Zm00001eb425100;Zm00001eb390860;Zm00001eb109910;Zm00001eb040810	6	Zm00001eb316920;Zm00001eb374630;Zm00001eb390860;Zm00001eb109910	4	Zm00001eb425100;Zm00001eb040810	2
Biological process	GO:0016054	organic acid catabolic process	0.177421	Zm00001eb251960;Zm00001eb283860;Zm00001eb109370;Zm00001eb367110;Zm00001eb203230	5	Zm00001eb109370;Zm00001eb203230	2	Zm00001eb251960;Zm00001eb283860;Zm00001eb367110	3
Biological process	GO:0006690	icosanoid metabolic process	0.177739	Zm00001eb316920;Zm00001eb374630	2	Zm00001eb316920;Zm00001eb374630	2	--	0
Biological process	GO:0034754	cellular hormone metabolic process	0.177739	Zm00001eb160700;Zm00001eb312250	2	Zm00001eb312250	1	Zm00001eb160700	1
Biological process	GO:0009992	cellular water homeostasis	0.181666	Zm00001eb350600	1	Zm00001eb350600	1	--	0
Biological process	GO:0046688	response to copper ion	0.181666	novel.1262	1	novel.1262	1	--	0
Biological process	GO:0048445	carpel morphogenesis	0.181666	Zm00001eb100380	1	--	0	Zm00001eb100380	1
Biological process	GO:0048577	negative regulation of short-day photoperiodism, flowering	0.181666	Zm00001eb230840	1	Zm00001eb230840	1	--	0
Biological process	GO:0080113	regulation of seed growth	0.181666	Zm00001eb005500	1	Zm00001eb005500	1	--	0
Biological process	GO:0090057	root radial pattern formation	0.181666	Zm00001eb241870	1	Zm00001eb241870	1	--	0
Biological process	GO:1905582	response to mannose	0.181666	Zm00001eb006260	1	--	0	Zm00001eb006260	1
Biological process	GO:0006417	regulation of translation	0.183573	Zm00001eb065660;Zm00001eb326540;Zm00001eb096930;novel.451;Zm00001eb109910;Zm00001eb311340	6	Zm00001eb109910;Zm00001eb311340	2	Zm00001eb065660;Zm00001eb326540;Zm00001eb096930;novel.451	4
Biological process	GO:0050657	nucleic acid transport	0.184224	Zm00001eb329350;novel.296;Zm00001eb329320;Zm00001eb029370	4	novel.296;Zm00001eb029370	2	Zm00001eb329350;Zm00001eb329320	2
Biological process	GO:0050658	RNA transport	0.184224	Zm00001eb329350;novel.296;Zm00001eb329320;Zm00001eb029370	4	novel.296;Zm00001eb029370	2	Zm00001eb329350;Zm00001eb329320	2
Biological process	GO:0051236	establishment of RNA localization	0.184224	Zm00001eb329350;novel.296;Zm00001eb329320;Zm00001eb029370	4	novel.296;Zm00001eb029370	2	Zm00001eb329350;Zm00001eb329320	2
Biological process	GO:0071365	cellular response to auxin stimulus	0.185278	Zm00001eb038070;Zm00001eb301590;Zm00001eb100800;Zm00001eb241870;Zm00001eb425100;Zm00001eb234690;Zm00001eb052590;novel.190	8	Zm00001eb241870	1	Zm00001eb038070;Zm00001eb301590;Zm00001eb100800;Zm00001eb425100;Zm00001eb234690;Zm00001eb052590;novel.190	7
Biological process	GO:0000291	nuclear-transcribed mRNA catabolic process, exonucleolytic	0.185694	Zm00001eb065660;novel.451	2	--	0	Zm00001eb065660;novel.451	2
Biological process	GO:0009875	pollen-pistil interaction	0.185694	novel.858;Zm00001eb009250	2	novel.858	1	Zm00001eb009250	1
Biological process	GO:0016143	S-glycoside metabolic process	0.18969	Zm00001eb187190;Zm00001eb326450	2	Zm00001eb326450	1	Zm00001eb187190	1
Biological process	GO:0019757	glycosinolate metabolic process	0.18969	Zm00001eb187190;Zm00001eb326450	2	Zm00001eb326450	1	Zm00001eb187190	1
Biological process	GO:0019760	glucosinolate metabolic process	0.18969	Zm00001eb187190;Zm00001eb326450	2	Zm00001eb326450	1	Zm00001eb187190	1
Biological process	GO:0042435	indole-containing compound biosynthetic process	0.18969	Zm00001eb009250;Zm00001eb416690	2	Zm00001eb416690	1	Zm00001eb009250	1
Biological process	GO:0010929	positive regulation of auxin mediated signaling pathway	0.190733	Zm00001eb234690	1	--	0	Zm00001eb234690	1
Biological process	GO:0016103	diterpenoid catabolic process	0.190733	Zm00001eb283860	1	--	0	Zm00001eb283860	1
Biological process	GO:0045487	gibberellin catabolic process	0.190733	Zm00001eb283860	1	--	0	Zm00001eb283860	1
Biological process	GO:0051291	protein heterooligomerization	0.190733	novel.2063	1	--	0	novel.2063	1
Biological process	GO:0006403	RNA localization	0.190891	Zm00001eb329350;novel.296;Zm00001eb329320;Zm00001eb029370	4	novel.296;Zm00001eb029370	2	Zm00001eb329350;Zm00001eb329320	2
Biological process	GO:0006405	RNA export from nucleus	0.197717	Zm00001eb329350;Zm00001eb329320	2	--	0	Zm00001eb329350;Zm00001eb329320	2
Biological process	GO:0018958	phenol-containing compound metabolic process	0.197717	Zm00001eb335390;Zm00001eb416690	2	Zm00001eb416690	1	Zm00001eb335390	1
Biological process	GO:0006152	purine nucleoside catabolic process	0.199701	Zm00001eb032010	1	--	0	Zm00001eb032010	1
Biological process	GO:0010039	response to iron ion	0.199701	Zm00001eb137930	1	Zm00001eb137930	1	--	0
Biological process	GO:0042753	positive regulation of circadian rhythm	0.199701	Zm00001eb390860	1	Zm00001eb390860	1	--	0
Biological process	GO:0051643	endoplasmic reticulum localization	0.199701	Zm00001eb416660	1	--	0	Zm00001eb416660	1
Biological process	GO:0060321	acceptance of pollen	0.199701	novel.858	1	novel.858	1	--	0
Biological process	GO:0060862	negative regulation of floral organ abscission	0.199701	Zm00001eb168040	1	--	0	Zm00001eb168040	1
Biological process	GO:0061817	endoplasmic reticulum-plasma membrane tethering	0.199701	Zm00001eb416660	1	--	0	Zm00001eb416660	1
Biological process	GO:0080142	regulation of salicylic acid biosynthetic process	0.199701	Zm00001eb335390	1	--	0	Zm00001eb335390	1
Biological process	GO:0080163	regulation of protein serine/threonine phosphatase activity	0.199701	Zm00001eb390860	1	Zm00001eb390860	1	--	0
Biological process	GO:0010647	positive regulation of cell communication	0.199897	Zm00001eb415520;Zm00001eb368340;Zm00001eb234690;Zm00001eb420440	4	Zm00001eb368340	1	Zm00001eb415520;Zm00001eb234690;Zm00001eb420440	3
Biological process	GO:0002683	negative regulation of immune system process	0.201746	Zm00001eb172290;Zm00001eb430040	2	Zm00001eb430040	1	Zm00001eb172290	1
Biological process	GO:0050777	negative regulation of immune response	0.201746	Zm00001eb172290;Zm00001eb430040	2	Zm00001eb430040	1	Zm00001eb172290	1
Biological process	GO:2000022	regulation of jasmonic acid mediated signaling pathway	0.201746	novel.2202;Zm00001eb006000	2	--	0	novel.2202;Zm00001eb006000	2
Biological process	GO:0009698	phenylpropanoid metabolic process	0.203775	Zm00001eb316920;Zm00001eb374630;Zm00001eb333290;Zm00001eb197310;Zm00001eb088800;Zm00001eb145860	6	Zm00001eb316920;Zm00001eb374630;Zm00001eb145860	3	Zm00001eb333290;Zm00001eb197310;Zm00001eb088800	3
Biological process	GO:1901606	alpha-amino acid catabolic process	0.205723	Zm00001eb109370;Zm00001eb367110;Zm00001eb203230	3	Zm00001eb109370;Zm00001eb203230	2	Zm00001eb367110	1
Biological process	GO:0006570	tyrosine metabolic process	0.208569	Zm00001eb203230	1	Zm00001eb203230	1	--	0
Biological process	GO:0006821	chloride transport	0.208569	Zm00001eb119430	1	Zm00001eb119430	1	--	0
Biological process	GO:0045039	protein insertion into mitochondrial inner membrane	0.208569	Zm00001eb308440	1	Zm00001eb308440	1	--	0
Biological process	GO:0051289	protein homotetramerization	0.208569	novel.2063	1	--	0	novel.2063	1
Biological process	GO:0007602	phototransduction	0.209831	Zm00001eb235510;Zm00001eb333260	2	--	0	Zm00001eb235510;Zm00001eb333260	2
Biological process	GO:0009585	red, far-red light phototransduction	0.209831	Zm00001eb235510;Zm00001eb333260	2	--	0	Zm00001eb235510;Zm00001eb333260	2
Biological process	GO:0010029	regulation of seed germination	0.209831	Zm00001eb023350;Zm00001eb291540	2	Zm00001eb023350	1	Zm00001eb291540	1
Biological process	GO:0051606	detection of stimulus	0.211443	Zm00001eb235510;Zm00001eb333260;Zm00001eb077540	3	--	0	Zm00001eb235510;Zm00001eb333260;Zm00001eb077540	3
Biological process	GO:0034248	regulation of cellular amide metabolic process	0.214168	Zm00001eb065660;Zm00001eb326540;Zm00001eb096930;novel.451;Zm00001eb109910;Zm00001eb311340	6	Zm00001eb109910;Zm00001eb311340	2	Zm00001eb065660;Zm00001eb326540;Zm00001eb096930;novel.451	4
Biological process	GO:0055080	cation homeostasis	0.215918	novel.1262;novel.411;Zm00001eb360150;Zm00001eb381570;Zm00001eb247810;Zm00001eb211310	6	novel.1262;novel.411;Zm00001eb381570;Zm00001eb247810	4	Zm00001eb360150;Zm00001eb211310	2
Biological process	GO:0009164	nucleoside catabolic process	0.217339	Zm00001eb032010	1	--	0	Zm00001eb032010	1
Biological process	GO:0034656	nucleobase-containing small molecule catabolic process	0.217339	Zm00001eb032010	1	--	0	Zm00001eb032010	1
Biological process	GO:0060860	regulation of floral organ abscission	0.217339	Zm00001eb168040	1	--	0	Zm00001eb168040	1
Biological process	GO:0090333	regulation of stomatal closure	0.217949	Zm00001eb406090;Zm00001eb163460	2	Zm00001eb406090;Zm00001eb163460	2	--	0
Biological process	GO:0006636	unsaturated fatty acid biosynthetic process	0.226013	Zm00001eb413200	1	Zm00001eb413200	1	--	0
Biological process	GO:0007007	inner mitochondrial membrane organization	0.226013	Zm00001eb308440	1	Zm00001eb308440	1	--	0
Biological process	GO:0007097	nuclear migration	0.226013	Zm00001eb163740	1	--	0	Zm00001eb163740	1
Biological process	GO:0033559	unsaturated fatty acid metabolic process	0.226013	Zm00001eb413200	1	Zm00001eb413200	1	--	0
Biological process	GO:0034309	primary alcohol biosynthetic process	0.226013	Zm00001eb071090	1	--	0	Zm00001eb071090	1
Biological process	GO:0046185	aldehyde catabolic process	0.226013	Zm00001eb413220	1	--	0	Zm00001eb413220	1
Biological process	GO:0080112	seed growth	0.226013	Zm00001eb005500	1	Zm00001eb005500	1	--	0
Biological process	GO:0002218	activation of innate immune response	0.226094	Zm00001eb245520;Zm00001eb080230	2	--	0	Zm00001eb245520;Zm00001eb080230	2
Biological process	GO:0002253	activation of immune response	0.226094	Zm00001eb245520;Zm00001eb080230	2	--	0	Zm00001eb245520;Zm00001eb080230	2
Biological process	GO:1901657	glycosyl compound metabolic process	0.231718	Zm00001eb187190;Zm00001eb032010;Zm00001eb326450	3	Zm00001eb326450	1	Zm00001eb187190;Zm00001eb032010	2
Biological process	GO:0009700	indole phytoalexin biosynthetic process	0.23459	Zm00001eb009250	1	--	0	Zm00001eb009250	1
Biological process	GO:0010120	camalexin biosynthetic process	0.23459	Zm00001eb009250	1	--	0	Zm00001eb009250	1
Biological process	GO:0046217	indole phytoalexin metabolic process	0.23459	Zm00001eb009250	1	--	0	Zm00001eb009250	1
Biological process	GO:0052317	camalexin metabolic process	0.23459	Zm00001eb009250	1	--	0	Zm00001eb009250	1
Biological process	GO:0010087	phloem or xylem histogenesis	0.237576	Zm00001eb038070;Zm00001eb100800;Zm00001eb249290	3	--	0	Zm00001eb038070;Zm00001eb100800;Zm00001eb249290	3
Biological process	GO:0009612	response to mechanical stimulus	0.243073	Zm00001eb341630	1	--	0	Zm00001eb341630	1
Biological process	GO:0009697	salicylic acid biosynthetic process	0.243073	Zm00001eb335390	1	--	0	Zm00001eb335390	1
Biological process	GO:0009904	chloroplast accumulation movement	0.243073	Zm00001eb006320	1	--	0	Zm00001eb006320	1
Biological process	GO:0009959	negative gravitropism	0.243073	Zm00001eb023350	1	Zm00001eb023350	1	--	0
Biological process	GO:0042548	regulation of photosynthesis, light reaction	0.243073	Zm00001eb273380	1	--	0	Zm00001eb273380	1
Biological process	GO:0032879	regulation of localization	0.246096	Zm00001eb330730;Zm00001eb111590;Zm00001eb361550;Zm00001eb100380;Zm00001eb311920	5	Zm00001eb361550	1	Zm00001eb330730;Zm00001eb111590;Zm00001eb100380;Zm00001eb311920	4
Biological process	GO:0009583	detection of light stimulus	0.246539	Zm00001eb235510;Zm00001eb333260	2	--	0	Zm00001eb235510;Zm00001eb333260	2
Biological process	GO:0002684	positive regulation of immune system process	0.250638	Zm00001eb245520;Zm00001eb080230	2	--	0	Zm00001eb245520;Zm00001eb080230	2
Biological process	GO:0045089	positive regulation of innate immune response	0.250638	Zm00001eb245520;Zm00001eb080230	2	--	0	Zm00001eb245520;Zm00001eb080230	2
Biological process	GO:0050778	positive regulation of immune response	0.250638	Zm00001eb245520;Zm00001eb080230	2	--	0	Zm00001eb245520;Zm00001eb080230	2
Biological process	GO:0000027	ribosomal large subunit assembly	0.251463	Zm00001eb413490	1	--	0	Zm00001eb413490	1
Biological process	GO:0006884	cell volume homeostasis	0.251463	Zm00001eb350600	1	Zm00001eb350600	1	--	0
Biological process	GO:0051647	nucleus localization	0.251463	Zm00001eb163740	1	--	0	Zm00001eb163740	1
Biological process	GO:0097167	circadian regulation of translation	0.251463	Zm00001eb109910	1	Zm00001eb109910	1	--	0
Biological process	GO:0098659	inorganic cation import across plasma membrane	0.251463	Zm00001eb381570	1	Zm00001eb381570	1	--	0
Biological process	GO:0099587	inorganic ion import across plasma membrane	0.251463	Zm00001eb381570	1	Zm00001eb381570	1	--	0
Biological process	GO:0110095	cellular detoxification of aldehyde	0.251463	Zm00001eb208270	1	Zm00001eb208270	1	--	0
Biological process	GO:0110096	cellular response to aldehyde	0.251463	Zm00001eb208270	1	Zm00001eb208270	1	--	0
Biological process	GO:0071897	DNA biosynthetic process	0.254739	Zm00001eb043290;Zm00001eb425100	2	--	0	Zm00001eb043290;Zm00001eb425100	2
Biological process	GO:1900140	regulation of seedling development	0.254739	Zm00001eb023350;Zm00001eb291540	2	Zm00001eb023350	1	Zm00001eb291540	1
Biological process	GO:0000122	negative regulation of transcription by RNA polymerase II	0.259759	Zm00001eb267730	1	Zm00001eb267730	1	--	0
Biological process	GO:0009299	mRNA transcription	0.259759	Zm00001eb230840	1	Zm00001eb230840	1	--	0
Biological process	GO:0009768	photosynthesis, light harvesting in photosystem I	0.259759	Zm00001eb324090	1	--	0	Zm00001eb324090	1
Biological process	GO:0015996	chlorophyll catabolic process	0.259759	Zm00001eb119410	1	Zm00001eb119410	1	--	0
Biological process	GO:0051054	positive regulation of DNA metabolic process	0.259759	Zm00001eb425100	1	--	0	Zm00001eb425100	1
Biological process	GO:0090502	RNA phosphodiester bond hydrolysis, endonucleolytic	0.259759	Zm00001eb125480	1	Zm00001eb125480	1	--	0
Biological process	GO:1901658	glycosyl compound catabolic process	0.259759	Zm00001eb032010	1	--	0	Zm00001eb032010	1
Biological process	GO:1990641	response to iron ion starvation	0.259759	Zm00001eb393560	1	--	0	Zm00001eb393560	1
Biological process	GO:0009739	response to gibberellin	0.261115	Zm00001eb234120;Zm00001eb286490;Zm00001eb206730;Zm00001eb350280	4	--	0	Zm00001eb234120;Zm00001eb286490;Zm00001eb206730;Zm00001eb350280	4
Biological process	GO:0009410	response to xenobiotic stimulus	0.267964	novel.913	1	novel.913	1	--	0
Biological process	GO:0046149	pigment catabolic process	0.267964	Zm00001eb119410	1	Zm00001eb119410	1	--	0
Biological process	GO:0055075	potassium ion homeostasis	0.267964	Zm00001eb381570	1	Zm00001eb381570	1	--	0
Biological process	GO:0006913	nucleocytoplasmic transport	0.270198	Zm00001eb329350;novel.296;Zm00001eb329320	3	novel.296	1	Zm00001eb329350;Zm00001eb329320	2
Biological process	GO:0051169	nuclear transport	0.270198	Zm00001eb329350;novel.296;Zm00001eb329320	3	novel.296	1	Zm00001eb329350;Zm00001eb329320	2
Biological process	GO:0006289	nucleotide-excision repair	0.275253	Zm00001eb043290;Zm00001eb226220	2	Zm00001eb226220	1	Zm00001eb043290	1
Biological process	GO:0009581	detection of external stimulus	0.275253	Zm00001eb235510;Zm00001eb333260	2	--	0	Zm00001eb235510;Zm00001eb333260	2
Biological process	GO:0009582	detection of abiotic stimulus	0.275253	Zm00001eb235510;Zm00001eb333260	2	--	0	Zm00001eb235510;Zm00001eb333260	2
Biological process	GO:0009638	phototropism	0.276079	Zm00001eb333260	1	--	0	Zm00001eb333260	1
Biological process	GO:0009686	gibberellin biosynthetic process	0.276079	Zm00001eb071090	1	--	0	Zm00001eb071090	1
Biological process	GO:0030104	water homeostasis	0.276079	Zm00001eb350600	1	Zm00001eb350600	1	--	0
Biological process	GO:0042594	response to starvation	0.278204	Zm00001eb415520;Zm00001eb393560;Zm00001eb420440;Zm00001eb006260	4	--	0	Zm00001eb415520;Zm00001eb393560;Zm00001eb420440;Zm00001eb006260	4
Biological process	GO:0009813	flavonoid biosynthetic process	0.279188	Zm00001eb159020;novel.484;Zm00001eb118430	3	Zm00001eb118430	1	Zm00001eb159020;novel.484	2
Biological process	GO:0009741	response to brassinosteroid	0.280661	Zm00001eb341630;Zm00001eb187340;Zm00001eb005500;Zm00001eb187290	4	Zm00001eb005500	1	Zm00001eb341630;Zm00001eb187340;Zm00001eb187290	3
Biological process	GO:0051168	nuclear export	0.283454	Zm00001eb329350;Zm00001eb329320	2	--	0	Zm00001eb329350;Zm00001eb329320	2
Biological process	GO:0010337	regulation of salicylic acid metabolic process	0.284103	Zm00001eb335390	1	--	0	Zm00001eb335390	1
Biological process	GO:0016129	phytosteroid biosynthetic process	0.284103	Zm00001eb300570	1	Zm00001eb300570	1	--	0
Biological process	GO:0016132	brassinosteroid biosynthetic process	0.284103	Zm00001eb300570	1	Zm00001eb300570	1	--	0
Biological process	GO:0120178	steroid hormone biosynthetic process	0.284103	Zm00001eb300570	1	Zm00001eb300570	1	--	0
Biological process	GO:1902456	regulation of stomatal opening	0.284103	Zm00001eb414870	1	--	0	Zm00001eb414870	1
Biological process	GO:1990069	stomatal opening	0.284103	Zm00001eb414870	1	--	0	Zm00001eb414870	1
Biological process	GO:1902531	regulation of intracellular signal transduction	0.287551	Zm00001eb331080;Zm00001eb013600	2	--	0	Zm00001eb331080;Zm00001eb013600	2
Biological process	GO:0072507	divalent inorganic cation homeostasis	0.291646	novel.411;Zm00001eb247810	2	novel.411;Zm00001eb247810	2	--	0
Biological process	GO:0051204	protein insertion into mitochondrial membrane	0.292039	Zm00001eb308440	1	Zm00001eb308440	1	--	0
Biological process	GO:0072523	purine-containing compound catabolic process	0.292039	Zm00001eb032010	1	--	0	Zm00001eb032010	1
Biological process	GO:0090158	endoplasmic reticulum membrane organization	0.292039	Zm00001eb416660	1	--	0	Zm00001eb416660	1
Biological process	GO:0022603	regulation of anatomical structure morphogenesis	0.292992	Zm00001eb187340;Zm00001eb350150;Zm00001eb187290;Zm00001eb101560	4	Zm00001eb101560	1	Zm00001eb187340;Zm00001eb350150;Zm00001eb187290	3
Biological process	GO:0019439	aromatic compound catabolic process	0.293931	Zm00001eb119410;Zm00001eb065660;Zm00001eb032010;Zm00001eb367110;novel.451;Zm00001eb203230;Zm00001eb125480	7	Zm00001eb119410;Zm00001eb203230;Zm00001eb125480	3	Zm00001eb065660;Zm00001eb032010;Zm00001eb367110;novel.451	4
Biological process	GO:0051248	negative regulation of protein metabolic process	0.295467	Zm00001eb065660;Zm00001eb326540;Zm00001eb096930;novel.451	4	--	0	Zm00001eb065660;Zm00001eb326540;Zm00001eb096930;novel.451	4
Biological process	GO:0002764	immune response-regulating signaling pathway	0.295738	Zm00001eb245520;Zm00001eb080230	2	--	0	Zm00001eb245520;Zm00001eb080230	2
Biological process	GO:0051347	positive regulation of transferase activity	0.299888	Zm00001eb425100	1	--	0	Zm00001eb425100	1
Biological process	GO:0062012	regulation of small molecule metabolic process	0.303279	Zm00001eb038070;Zm00001eb100800;Zm00001eb335390	3	--	0	Zm00001eb038070;Zm00001eb100800;Zm00001eb335390	3
Biological process	GO:0048527	lateral root development	0.306299	Zm00001eb400520;Zm00001eb234690;Zm00001eb166250	3	Zm00001eb400520;Zm00001eb166250	2	Zm00001eb234690	1
Biological process	GO:0010207	photosystem II assembly	0.30765	Zm00001eb273380	1	--	0	Zm00001eb273380	1
Biological process	GO:0016575	histone deacetylation	0.30765	Zm00001eb267730	1	Zm00001eb267730	1	--	0
Biological process	GO:0034308	primary alcohol metabolic process	0.30765	Zm00001eb071090	1	--	0	Zm00001eb071090	1
Biological process	GO:0043467	regulation of generation of precursor metabolites and energy	0.30765	Zm00001eb273380	1	--	0	Zm00001eb273380	1
Biological process	GO:0048587	regulation of short-day photoperiodism, flowering	0.30765	Zm00001eb230840	1	Zm00001eb230840	1	--	0
Biological process	GO:0071805	potassium ion transmembrane transport	0.30765	Zm00001eb381570	1	Zm00001eb381570	1	--	0
Biological process	GO:0042537	benzene-containing compound metabolic process	0.307991	Zm00001eb367110;Zm00001eb335390	2	--	0	Zm00001eb367110;Zm00001eb335390	2
Biological process	GO:0009787	regulation of abscisic acid-activated signaling pathway	0.31037	Zm00001eb286490;Zm00001eb350280;Zm00001eb368340;Zm00001eb326450	4	Zm00001eb368340;Zm00001eb326450	2	Zm00001eb286490;Zm00001eb350280	2
Biological process	GO:1901419	regulation of response to alcohol	0.31037	Zm00001eb286490;Zm00001eb350280;Zm00001eb368340;Zm00001eb326450	4	Zm00001eb368340;Zm00001eb326450	2	Zm00001eb286490;Zm00001eb350280	2
Biological process	GO:1905957	regulation of cellular response to alcohol	0.31037	Zm00001eb286490;Zm00001eb350280;Zm00001eb368340;Zm00001eb326450	4	Zm00001eb368340;Zm00001eb326450	2	Zm00001eb286490;Zm00001eb350280	2
Biological process	GO:0000288	nuclear-transcribed mRNA catabolic process, deadenylation-dependent decay	0.312067	Zm00001eb065660;novel.451	2	--	0	Zm00001eb065660;novel.451	2
Biological process	GO:0003333	amino acid transmembrane transport	0.312067	Zm00001eb161250;Zm00001eb189540	2	--	0	Zm00001eb161250;Zm00001eb189540	2
Biological process	GO:0045814	negative regulation of gene expression, epigenetic	0.312343	Zm00001eb428330;Zm00001eb150860;Zm00001eb113970	3	Zm00001eb428330;Zm00001eb150860;Zm00001eb113970	3	--	0
Biological process	GO:0002097	tRNA wobble base modification	0.315326	Zm00001eb032010	1	--	0	Zm00001eb032010	1
Biological process	GO:0006476	protein deacetylation	0.315326	Zm00001eb267730	1	Zm00001eb267730	1	--	0
Biological process	GO:0006893	Golgi to plasma membrane transport	0.315326	novel.858	1	novel.858	1	--	0
Biological process	GO:0030048	actin filament-based movement	0.315326	Zm00001eb163740	1	--	0	Zm00001eb163740	1
Biological process	GO:0051262	protein tetramerization	0.315326	novel.2063	1	--	0	novel.2063	1
Biological process	GO:0090151	establishment of protein localization to mitochondrial membrane	0.315326	Zm00001eb308440	1	Zm00001eb308440	1	--	0
Biological process	GO:0099515	actin filament-based transport	0.315326	Zm00001eb163740	1	--	0	Zm00001eb163740	1
Biological process	GO:1901000	regulation of response to salt stress	0.315366	Zm00001eb212120;Zm00001eb331080;Zm00001eb029370	3	Zm00001eb029370	1	Zm00001eb212120;Zm00001eb331080	2
Biological process	GO:0008219	cell death	0.316282	Zm00001eb172290;Zm00001eb245520;Zm00001eb285760;Zm00001eb077540;Zm00001eb430040;Zm00001eb080230	6	Zm00001eb285760;Zm00001eb430040	2	Zm00001eb172290;Zm00001eb245520;Zm00001eb077540;Zm00001eb080230	4
Biological process	GO:1901361	organic cyclic compound catabolic process	0.316745	Zm00001eb119410;Zm00001eb065660;Zm00001eb032010;Zm00001eb367110;novel.451;Zm00001eb203230;Zm00001eb125480	7	Zm00001eb119410;Zm00001eb203230;Zm00001eb125480	3	Zm00001eb065660;Zm00001eb032010;Zm00001eb367110;novel.451	4
Biological process	GO:0060918	auxin transport	0.31785	Zm00001eb406090;Zm00001eb241870;Zm00001eb100380;Zm00001eb163460	4	Zm00001eb406090;Zm00001eb241870;Zm00001eb163460	3	Zm00001eb100380	1
Biological process	GO:0009914	hormone transport	0.322844	Zm00001eb406090;Zm00001eb241870;Zm00001eb100380;Zm00001eb163460	4	Zm00001eb406090;Zm00001eb241870;Zm00001eb163460	3	Zm00001eb100380	1
Biological process	GO:0010082	regulation of root meristem growth	0.322917	Zm00001eb101560	1	Zm00001eb101560	1	--	0
Biological process	GO:0010105	negative regulation of ethylene-activated signaling pathway	0.322917	Zm00001eb013600	1	--	0	Zm00001eb013600	1
Biological process	GO:0046246	terpene biosynthetic process	0.322917	Zm00001eb071090	1	--	0	Zm00001eb071090	1
Biological process	GO:0070298	negative regulation of phosphorelay signal transduction system	0.322917	Zm00001eb013600	1	--	0	Zm00001eb013600	1
Biological process	GO:0010017	red or far-red light signaling pathway	0.324262	Zm00001eb235510;Zm00001eb333260	2	--	0	Zm00001eb235510;Zm00001eb333260	2
Biological process	GO:0071489	cellular response to red or far red light	0.324262	Zm00001eb235510;Zm00001eb333260	2	--	0	Zm00001eb235510;Zm00001eb333260	2
Biological process	GO:0046700	heterocycle catabolic process	0.325991	Zm00001eb119410;Zm00001eb065660;Zm00001eb032010;Zm00001eb367110;novel.451;Zm00001eb125480	6	Zm00001eb119410;Zm00001eb125480	2	Zm00001eb065660;Zm00001eb032010;Zm00001eb367110;novel.451	4
Biological process	GO:0006833	water transport	0.330424	Zm00001eb074660	1	Zm00001eb074660	1	--	0
Biological process	GO:0042044	fluid transport	0.330424	Zm00001eb074660	1	Zm00001eb074660	1	--	0
Biological process	GO:0050826	response to freezing	0.330424	Zm00001eb193550	1	--	0	Zm00001eb193550	1
Biological process	GO:0050829	defense response to Gram-negative bacterium	0.330424	novel.190	1	--	0	novel.190	1
Biological process	GO:0044270	cellular nitrogen compound catabolic process	0.331837	Zm00001eb119410;Zm00001eb065660;Zm00001eb032010;Zm00001eb367110;novel.451;Zm00001eb125480	6	Zm00001eb119410;Zm00001eb125480	2	Zm00001eb065660;Zm00001eb032010;Zm00001eb367110;novel.451	4
Biological process	GO:0012501	programmed cell death	0.335597	Zm00001eb172290;Zm00001eb245520;Zm00001eb077540;Zm00001eb430040;Zm00001eb080230	5	Zm00001eb430040	1	Zm00001eb172290;Zm00001eb245520;Zm00001eb077540;Zm00001eb080230	4
Biological process	GO:0042546	cell wall biogenesis	0.337696	Zm00001eb341630;Zm00001eb071650;Zm00001eb323760;Zm00001eb040830;Zm00001eb430420;Zm00001eb149450	6	Zm00001eb323760;Zm00001eb430420	2	Zm00001eb341630;Zm00001eb071650;Zm00001eb040830;Zm00001eb149450	4
Biological process	GO:0006787	porphyrin-containing compound catabolic process	0.337848	Zm00001eb119410	1	Zm00001eb119410	1	--	0
Biological process	GO:0033015	tetrapyrrole catabolic process	0.337848	Zm00001eb119410	1	Zm00001eb119410	1	--	0
Biological process	GO:0048831	regulation of shoot system development	0.337859	Zm00001eb415520;Zm00001eb420440;Zm00001eb259000;Zm00001eb181410	4	--	0	Zm00001eb415520;Zm00001eb420440;Zm00001eb259000;Zm00001eb181410	4
Biological process	GO:0009812	flavonoid metabolic process	0.339557	Zm00001eb159020;novel.484;Zm00001eb118430	3	Zm00001eb118430	1	Zm00001eb159020;novel.484	2
Biological process	GO:0047484	regulation of response to osmotic stress	0.339557	Zm00001eb212120;Zm00001eb331080;Zm00001eb029370	3	Zm00001eb029370	1	Zm00001eb212120;Zm00001eb331080	2
Biological process	GO:0002833	positive regulation of response to biotic stimulus	0.342578	Zm00001eb309760;Zm00001eb245520;Zm00001eb080230	3	--	0	Zm00001eb309760;Zm00001eb245520;Zm00001eb080230	3
Biological process	GO:0009820	alkaloid metabolic process	0.345191	Zm00001eb248540	1	Zm00001eb248540	1	--	0
Biological process	GO:0016553	base conversion or substitution editing	0.345191	Zm00001eb032010	1	--	0	Zm00001eb032010	1
Biological process	GO:2000067	regulation of root morphogenesis	0.345191	Zm00001eb350150	1	--	0	Zm00001eb350150	1
Biological process	GO:0009742	brassinosteroid mediated signaling pathway	0.345599	Zm00001eb187340;Zm00001eb005500;Zm00001eb187290	3	Zm00001eb005500	1	Zm00001eb187340;Zm00001eb187290	2
Biological process	GO:0043401	steroid hormone mediated signaling pathway	0.345599	Zm00001eb187340;Zm00001eb005500;Zm00001eb187290	3	Zm00001eb005500	1	Zm00001eb187340;Zm00001eb187290	2
Biological process	GO:0048545	response to steroid hormone	0.345599	Zm00001eb187340;Zm00001eb005500;Zm00001eb187290	3	Zm00001eb005500	1	Zm00001eb187340;Zm00001eb187290	2
Biological process	GO:0071367	cellular response to brassinosteroid stimulus	0.345599	Zm00001eb187340;Zm00001eb005500;Zm00001eb187290	3	Zm00001eb005500	1	Zm00001eb187340;Zm00001eb187290	2
Biological process	GO:0071383	cellular response to steroid hormone stimulus	0.345599	Zm00001eb187340;Zm00001eb005500;Zm00001eb187290	3	Zm00001eb005500	1	Zm00001eb187340;Zm00001eb187290	2
Biological process	GO:0010026	trichome differentiation	0.348475	Zm00001eb225410;Zm00001eb300570	2	Zm00001eb300570	1	Zm00001eb225410	1
Biological process	GO:0006814	sodium ion transport	0.352452	Zm00001eb381570	1	Zm00001eb381570	1	--	0
Biological process	GO:0010227	floral organ abscission	0.352452	Zm00001eb168040	1	--	0	Zm00001eb168040	1
Biological process	GO:0042278	purine nucleoside metabolic process	0.352452	Zm00001eb032010	1	--	0	Zm00001eb032010	1
Biological process	GO:0046855	inositol phosphate dephosphorylation	0.352452	Zm00001eb311920	1	--	0	Zm00001eb311920	1
Biological process	GO:0048354	mucilage biosynthetic process involved in seed coat development	0.352452	Zm00001eb341770	1	--	0	Zm00001eb341770	1
Biological process	GO:0071545	inositol phosphate catabolic process	0.352452	Zm00001eb311920	1	--	0	Zm00001eb311920	1
Biological process	GO:0007006	mitochondrial membrane organization	0.359633	Zm00001eb308440	1	Zm00001eb308440	1	--	0
Biological process	GO:0043666	regulation of phosphoprotein phosphatase activity	0.359633	Zm00001eb390860	1	Zm00001eb390860	1	--	0
Biological process	GO:0098657	import into cell	0.359633	Zm00001eb381570	1	Zm00001eb381570	1	--	0
Biological process	GO:0098739	import across plasma membrane	0.359633	Zm00001eb381570	1	Zm00001eb381570	1	--	0
Biological process	GO:0002832	negative regulation of response to biotic stimulus	0.360474	Zm00001eb172290;Zm00001eb430040	2	Zm00001eb430040	1	Zm00001eb172290	1
Biological process	GO:0006694	steroid biosynthetic process	0.360474	Zm00001eb300570;Zm00001eb135830	2	Zm00001eb300570;Zm00001eb135830	2	--	0
Biological process	GO:0032102	negative regulation of response to external stimulus	0.360474	Zm00001eb172290;Zm00001eb430040	2	Zm00001eb430040	1	Zm00001eb172290	1
Biological process	GO:0048528	post-embryonic root development	0.360682	Zm00001eb400520;Zm00001eb234690;Zm00001eb166250	3	Zm00001eb400520;Zm00001eb166250	2	Zm00001eb234690	1
Biological process	GO:0015931	nucleobase-containing compound transport	0.365439	Zm00001eb329350;novel.296;Zm00001eb329320;Zm00001eb029370	4	novel.296;Zm00001eb029370	2	Zm00001eb329350;Zm00001eb329320	2
Biological process	GO:0006302	double-strand break repair	0.366702	Zm00001eb043290;Zm00001eb226220;Zm00001eb171920	3	Zm00001eb226220;Zm00001eb171920	2	Zm00001eb043290	1
Biological process	GO:0043434	response to peptide hormone	0.366734	novel.851	1	--	0	novel.851	1
Biological process	GO:0048467	gynoecium development	0.368429	Zm00001eb100380;Zm00001eb230840	2	Zm00001eb230840	1	Zm00001eb100380	1
Biological process	GO:0031349	positive regulation of defense response	0.369708	Zm00001eb309760;Zm00001eb245520;Zm00001eb080230	3	--	0	Zm00001eb309760;Zm00001eb245520;Zm00001eb080230	3
Biological process	GO:0016128	phytosteroid metabolic process	0.373757	Zm00001eb300570	1	Zm00001eb300570	1	--	0
Biological process	GO:0016131	brassinosteroid metabolic process	0.373757	Zm00001eb300570	1	Zm00001eb300570	1	--	0
Biological process	GO:0006879	cellular iron ion homeostasis	0.380703	Zm00001eb360150	1	--	0	Zm00001eb360150	1
Biological process	GO:0009635	response to herbicide	0.380703	novel.913	1	novel.913	1	--	0
Biological process	GO:0009926	auxin polar transport	0.381707	Zm00001eb406090;Zm00001eb100380;Zm00001eb163460	3	Zm00001eb406090;Zm00001eb163460	2	Zm00001eb100380	1
Biological process	GO:0030003	cellular cation homeostasis	0.381707	Zm00001eb360150;Zm00001eb381570;Zm00001eb211310	3	Zm00001eb381570	1	Zm00001eb360150;Zm00001eb211310	2
Biological process	GO:0006813	potassium ion transport	0.384219	Zm00001eb381570;Zm00001eb274060	2	Zm00001eb381570;Zm00001eb274060	2	--	0
Biological process	GO:0006278	RNA-templated DNA biosynthetic process	0.387572	Zm00001eb043290	1	--	0	Zm00001eb043290	1
Biological process	GO:0007004	telomere maintenance via telomerase	0.387572	Zm00001eb043290	1	--	0	Zm00001eb043290	1
Biological process	GO:0010099	regulation of photomorphogenesis	0.387572	Zm00001eb235510	1	--	0	Zm00001eb235510	1
Biological process	GO:0035601	protein deacylation	0.387572	Zm00001eb267730	1	Zm00001eb267730	1	--	0
Biological process	GO:0046838	phosphorylated carbohydrate dephosphorylation	0.387572	Zm00001eb311920	1	--	0	Zm00001eb311920	1
Biological process	GO:0098732	macromolecule deacylation	0.387572	Zm00001eb267730	1	Zm00001eb267730	1	--	0
Biological process	GO:0002237	response to molecule of bacterial origin	0.392051	Zm00001eb234120;Zm00001eb206730	2	--	0	Zm00001eb234120;Zm00001eb206730	2
Biological process	GO:0009835	fruit ripening	0.394364	Zm00001eb055950	1	--	0	Zm00001eb055950	1
Biological process	GO:0010833	telomere maintenance via telomere lengthening	0.394364	Zm00001eb043290	1	--	0	Zm00001eb043290	1
Biological process	GO:0051205	protein insertion into membrane	0.394364	Zm00001eb308440	1	Zm00001eb308440	1	--	0
Biological process	GO:0065001	specification of axis polarity	0.394364	Zm00001eb350150	1	--	0	Zm00001eb350150	1
Biological process	GO:0080092	regulation of pollen tube growth	0.394364	Zm00001eb101560	1	Zm00001eb101560	1	--	0
Biological process	GO:1901652	response to peptide	0.394364	novel.851	1	--	0	novel.851	1
Biological process	GO:1902532	negative regulation of intracellular signal transduction	0.394364	Zm00001eb013600	1	--	0	Zm00001eb013600	1
Biological process	GO:0042545	cell wall modification	0.39595	Zm00001eb071650;Zm00001eb356620	2	Zm00001eb356620	1	Zm00001eb071650	1
Biological process	GO:1903825	organic acid transmembrane transport	0.39595	Zm00001eb161250;Zm00001eb189540	2	--	0	Zm00001eb161250;Zm00001eb189540	2
Biological process	GO:1905039	carboxylic acid transmembrane transport	0.39595	Zm00001eb161250;Zm00001eb189540	2	--	0	Zm00001eb161250;Zm00001eb189540	2
Biological process	GO:1901605	alpha-amino acid metabolic process	0.396695	Zm00001eb038070;Zm00001eb100800;Zm00001eb109370;Zm00001eb367110;Zm00001eb416690;Zm00001eb203230	6	Zm00001eb109370;Zm00001eb416690;Zm00001eb203230	3	Zm00001eb038070;Zm00001eb100800;Zm00001eb367110	3
Biological process	GO:0006575	cellular modified amino acid metabolic process	0.399607	novel.913;Zm00001eb156130;Zm00001eb208270	3	novel.913;Zm00001eb156130;Zm00001eb208270	3	--	0
Biological process	GO:0009615	response to virus	0.399838	Zm00001eb434140;Zm00001eb148420	2	Zm00001eb148420	1	Zm00001eb434140	1
Biological process	GO:0009403	toxin biosynthetic process	0.401082	Zm00001eb009250	1	--	0	Zm00001eb009250	1
Biological process	GO:0009696	salicylic acid metabolic process	0.401082	Zm00001eb335390	1	--	0	Zm00001eb335390	1
Biological process	GO:0009838	abscission	0.401082	Zm00001eb168040	1	--	0	Zm00001eb168040	1
Biological process	GO:0010091	trichome branching	0.401082	Zm00001eb225410	1	--	0	Zm00001eb225410	1
Biological process	GO:0010109	regulation of photosynthesis	0.401082	Zm00001eb273380	1	--	0	Zm00001eb273380	1
Biological process	GO:0036123	histone H3-K9 dimethylation	0.401082	Zm00001eb113970	1	Zm00001eb113970	1	--	0
Biological process	GO:0048572	short-day photoperiodism	0.401082	Zm00001eb230840	1	Zm00001eb230840	1	--	0
Biological process	GO:0048575	short-day photoperiodism, flowering	0.401082	Zm00001eb230840	1	Zm00001eb230840	1	--	0
Biological process	GO:0052314	phytoalexin metabolic process	0.401082	Zm00001eb009250	1	--	0	Zm00001eb009250	1
Biological process	GO:0052315	phytoalexin biosynthetic process	0.401082	Zm00001eb009250	1	--	0	Zm00001eb009250	1
Biological process	GO:0002239	response to oomycetes	0.403714	Zm00001eb403180;Zm00001eb174500	2	Zm00001eb403180;Zm00001eb174500	2	--	0
Biological process	GO:0043067	regulation of programmed cell death	0.403714	Zm00001eb172290;Zm00001eb430040	2	Zm00001eb430040	1	Zm00001eb172290	1
Biological process	GO:2000070	regulation of response to water deprivation	0.403714	Zm00001eb212120;Zm00001eb029370	2	Zm00001eb029370	1	Zm00001eb212120	1
Biological process	GO:0006073	cellular glucan metabolic process	0.412152	Zm00001eb341630;Zm00001eb071650;Zm00001eb323760;Zm00001eb040830;Zm00001eb430420	5	Zm00001eb323760;Zm00001eb430420	2	Zm00001eb341630;Zm00001eb071650;Zm00001eb040830	3
Biological process	GO:0044042	glucan metabolic process	0.412152	Zm00001eb341630;Zm00001eb071650;Zm00001eb323760;Zm00001eb040830;Zm00001eb430420	5	Zm00001eb323760;Zm00001eb430420	2	Zm00001eb341630;Zm00001eb071650;Zm00001eb040830	3
Biological process	GO:0009756	carbohydrate mediated signaling	0.414296	Zm00001eb425100	1	--	0	Zm00001eb425100	1
Biological process	GO:0009956	radial pattern formation	0.414296	Zm00001eb241870	1	Zm00001eb241870	1	--	0
Biological process	GO:0010167	response to nitrate	0.414296	Zm00001eb425100	1	--	0	Zm00001eb425100	1
Biological process	GO:0010182	sugar mediated signaling pathway	0.414296	Zm00001eb425100	1	--	0	Zm00001eb425100	1
Biological process	GO:0010921	regulation of phosphatase activity	0.414296	Zm00001eb390860	1	Zm00001eb390860	1	--	0
Biological process	GO:0051260	protein homooligomerization	0.414296	novel.2063	1	--	0	novel.2063	1
Biological process	GO:1902584	positive regulation of response to water deprivation	0.414296	Zm00001eb212120	1	--	0	Zm00001eb212120	1
Biological process	GO:0009116	nucleoside metabolic process	0.420793	Zm00001eb032010	1	--	0	Zm00001eb032010	1
Biological process	GO:0009825	multidimensional cell growth	0.420793	Zm00001eb356620	1	Zm00001eb356620	1	--	0
Biological process	GO:0009958	positive gravitropism	0.420793	Zm00001eb241870	1	Zm00001eb241870	1	--	0
Biological process	GO:0010769	regulation of cell morphogenesis involved in differentiation	0.420793	Zm00001eb101560	1	Zm00001eb101560	1	--	0
Biological process	GO:0031407	oxylipin metabolic process	0.420793	Zm00001eb267640	1	--	0	Zm00001eb267640	1
Biological process	GO:0031408	oxylipin biosynthetic process	0.420793	Zm00001eb267640	1	--	0	Zm00001eb267640	1
Biological process	GO:0042398	cellular modified amino acid biosynthetic process	0.420793	Zm00001eb208270	1	Zm00001eb208270	1	--	0
Biological process	GO:0048579	negative regulation of long-day photoperiodism, flowering	0.420793	Zm00001eb230840	1	Zm00001eb230840	1	--	0
Biological process	GO:0006865	amino acid transport	0.426712	Zm00001eb161250;Zm00001eb189540	2	--	0	Zm00001eb161250;Zm00001eb189540	2
Biological process	GO:0009694	jasmonic acid metabolic process	0.427219	Zm00001eb267640	1	--	0	Zm00001eb267640	1
Biological process	GO:0010043	response to zinc ion	0.427219	Zm00001eb131500	1	--	0	Zm00001eb131500	1
Biological process	GO:0018027	peptidyl-lysine dimethylation	0.427219	Zm00001eb113970	1	Zm00001eb113970	1	--	0
Biological process	GO:0032885	regulation of polysaccharide biosynthetic process	0.427219	Zm00001eb373370	1	--	0	Zm00001eb373370	1
Biological process	GO:0046174	polyol catabolic process	0.427219	Zm00001eb311920	1	--	0	Zm00001eb311920	1
Biological process	GO:0046856	phosphatidylinositol dephosphorylation	0.427219	Zm00001eb311920	1	--	0	Zm00001eb311920	1
Biological process	GO:0006109	regulation of carbohydrate metabolic process	0.4305	novel.851;Zm00001eb373370	2	--	0	novel.851;Zm00001eb373370	2
Biological process	GO:0050779	RNA destabilization	0.4305	Zm00001eb065660;novel.451	2	--	0	Zm00001eb065660;novel.451	2
Biological process	GO:0061157	mRNA destabilization	0.4305	Zm00001eb065660;novel.451	2	--	0	Zm00001eb065660;novel.451	2
Biological process	GO:0031667	response to nutrient levels	0.432661	Zm00001eb415520;Zm00001eb393560;Zm00001eb420440;Zm00001eb006260	4	--	0	Zm00001eb415520;Zm00001eb393560;Zm00001eb420440;Zm00001eb006260	4
Biological process	GO:0010274	hydrotropism	0.433573	Zm00001eb418460	1	--	0	Zm00001eb418460	1
Biological process	GO:0030641	regulation of cellular pH	0.433573	Zm00001eb381570	1	Zm00001eb381570	1	--	0
Biological process	GO:0030705	cytoskeleton-dependent intracellular transport	0.433573	Zm00001eb163740	1	--	0	Zm00001eb163740	1
Biological process	GO:0045595	regulation of cell differentiation	0.433573	Zm00001eb172290	1	--	0	Zm00001eb172290	1
Biological process	GO:0051453	regulation of intracellular pH	0.433573	Zm00001eb381570	1	Zm00001eb381570	1	--	0
Biological process	GO:2000652	regulation of secondary cell wall biogenesis	0.433573	Zm00001eb149450	1	--	0	Zm00001eb149450	1
Biological process	GO:0006749	glutathione metabolic process	0.434275	novel.913;Zm00001eb156130	2	novel.913;Zm00001eb156130	2	--	0
Biological process	GO:0009965	leaf morphogenesis	0.434275	Zm00001eb187340;Zm00001eb187290	2	--	0	Zm00001eb187340;Zm00001eb187290	2
Biological process	GO:0061014	positive regulation of mRNA catabolic process	0.434275	Zm00001eb065660;novel.451	2	--	0	Zm00001eb065660;novel.451	2
Biological process	GO:0140115	export across plasma membrane	0.434275	Zm00001eb106010;Zm00001eb343090	2	--	0	Zm00001eb106010;Zm00001eb343090	2
Biological process	GO:0090696	post-embryonic plant organ development	0.437578	Zm00001eb400520;Zm00001eb234690;Zm00001eb100380;Zm00001eb166250	4	Zm00001eb400520;Zm00001eb166250	2	Zm00001eb234690;Zm00001eb100380	2
Biological process	GO:0048359	mucilage metabolic process involved in seed coat development	0.439857	Zm00001eb341770	1	--	0	Zm00001eb341770	1
Biological process	GO:0010286	heat acclimation	0.446072	Zm00001eb285760	1	Zm00001eb285760	1	--	0
Biological process	GO:0019253	reductive pentose-phosphate cycle	0.446072	Zm00001eb092540	1	--	0	Zm00001eb092540	1
Biological process	GO:0019685	photosynthesis, dark reaction	0.446072	Zm00001eb092540	1	--	0	Zm00001eb092540	1
Biological process	GO:0006897	endocytosis	0.446561	Zm00001eb330730;Zm00001eb111590;Zm00001eb311920	3	--	0	Zm00001eb330730;Zm00001eb111590;Zm00001eb311920	3
Biological process	GO:0042538	hyperosmotic salinity response	0.452218	Zm00001eb184830	1	Zm00001eb184830	1	--	0
Biological process	GO:0010449	root meristem growth	0.464307	Zm00001eb101560	1	Zm00001eb101560	1	--	0
Biological process	GO:0046839	phospholipid dephosphorylation	0.464307	Zm00001eb311920	1	--	0	Zm00001eb311920	1
Biological process	GO:0071322	cellular response to carbohydrate stimulus	0.464307	Zm00001eb425100	1	--	0	Zm00001eb425100	1
Biological process	GO:1900426	positive regulation of defense response to bacterium	0.464307	Zm00001eb309760	1	--	0	Zm00001eb309760	1
Biological process	GO:0009063	cellular amino acid catabolic process	0.467627	Zm00001eb109370;Zm00001eb367110	2	Zm00001eb109370	1	Zm00001eb367110	1
Biological process	GO:0030244	cellulose biosynthetic process	0.467627	Zm00001eb323760;Zm00001eb040830	2	Zm00001eb323760	1	Zm00001eb040830	1
Biological process	GO:0045489	pectin biosynthetic process	0.467627	Zm00001eb373370;Zm00001eb051970	2	--	0	Zm00001eb373370;Zm00001eb051970	2
Biological process	GO:0000373	Group II intron splicing	0.470252	Zm00001eb424430	1	--	0	Zm00001eb424430	1
Biological process	GO:0009765	photosynthesis, light harvesting	0.470252	Zm00001eb324090	1	--	0	Zm00001eb324090	1
Biological process	GO:1903338	regulation of cell wall organization or biogenesis	0.470252	Zm00001eb149450	1	--	0	Zm00001eb149450	1
Biological process	GO:0010608	post-transcriptional regulation of gene expression	0.470986	Zm00001eb065660;Zm00001eb326540;Zm00001eb096930;novel.451;Zm00001eb109910;Zm00001eb311340	6	Zm00001eb109910;Zm00001eb311340	2	Zm00001eb065660;Zm00001eb326540;Zm00001eb096930;novel.451	4
Biological process	GO:1903313	positive regulation of mRNA metabolic process	0.47488	Zm00001eb065660;novel.451	2	--	0	Zm00001eb065660;novel.451	2
Biological process	GO:0006268	DNA unwinding involved in DNA replication	0.476131	Zm00001eb043290	1	--	0	Zm00001eb043290	1
Biological process	GO:0006972	hyperosmotic response	0.476131	Zm00001eb184830	1	Zm00001eb184830	1	--	0
Biological process	GO:0009749	response to glucose	0.476131	Zm00001eb006260	1	--	0	Zm00001eb006260	1
Biological process	GO:0032922	circadian regulation of gene expression	0.476131	Zm00001eb109910	1	Zm00001eb109910	1	--	0
Biological process	GO:0034620	cellular response to unfolded protein	0.476131	Zm00001eb148420	1	Zm00001eb148420	1	--	0
Biological process	GO:0035304	regulation of protein dephosphorylation	0.476131	Zm00001eb390860	1	Zm00001eb390860	1	--	0
Biological process	GO:1901001	negative regulation of response to salt stress	0.476131	Zm00001eb331080	1	--	0	Zm00001eb331080	1
Biological process	GO:0048580	regulation of post-embryonic development	0.476764	Zm00001eb235510;Zm00001eb023350;Zm00001eb259000;Zm00001eb181410;Zm00001eb291540;Zm00001eb230840	6	Zm00001eb023350;Zm00001eb230840	2	Zm00001eb235510;Zm00001eb259000;Zm00001eb181410;Zm00001eb291540	4
Biological process	GO:0000741	karyogamy	0.481944	Zm00001eb132840	1	--	0	Zm00001eb132840	1
Biological process	GO:0010197	polar nucleus fusion	0.481944	Zm00001eb132840	1	--	0	Zm00001eb132840	1
Biological process	GO:0031348	negative regulation of defense response	0.482073	Zm00001eb172290;Zm00001eb430040	2	Zm00001eb430040	1	Zm00001eb172290	1
Biological process	GO:0051338	regulation of transferase activity	0.482073	Zm00001eb425100;Zm00001eb400550	2	Zm00001eb400550	1	Zm00001eb425100	1
Biological process	GO:0010114	response to red light	0.487694	Zm00001eb235510	1	--	0	Zm00001eb235510	1
Biological process	GO:0030004	cellular monovalent inorganic cation homeostasis	0.487694	Zm00001eb381570	1	Zm00001eb381570	1	--	0
Biological process	GO:0051567	histone H3-K9 methylation	0.487694	Zm00001eb113970	1	Zm00001eb113970	1	--	0
Biological process	GO:0043488	regulation of mRNA stability	0.489205	Zm00001eb065660;novel.451	2	--	0	Zm00001eb065660;novel.451	2
Biological process	GO:0051656	establishment of organelle localization	0.492748	Zm00001eb163740;Zm00001eb006320	2	--	0	Zm00001eb163740;Zm00001eb006320	2
Biological process	GO:0061013	regulation of mRNA catabolic process	0.492748	Zm00001eb065660;novel.451	2	--	0	Zm00001eb065660;novel.451	2
Biological process	GO:0008361	regulation of cell size	0.49338	Zm00001eb350600	1	Zm00001eb350600	1	--	0
Biological process	GO:0034765	regulation of ion transmembrane transport	0.49338	Zm00001eb361550	1	Zm00001eb361550	1	--	0
Biological process	GO:0046854	phosphatidylinositol phosphate biosynthetic process	0.499003	Zm00001eb343470	1	Zm00001eb343470	1	--	0
Biological process	GO:0072583	clathrin-dependent endocytosis	0.499003	Zm00001eb311920	1	--	0	Zm00001eb311920	1
Biological process	GO:0006875	cellular metal ion homeostasis	0.499787	Zm00001eb360150;Zm00001eb211310	2	--	0	Zm00001eb360150;Zm00001eb211310	2
Biological process	GO:0043487	regulation of RNA stability	0.499787	Zm00001eb065660;novel.451	2	--	0	Zm00001eb065660;novel.451	2
Biological process	GO:0046395	carboxylic acid catabolic process	0.503072	Zm00001eb251960;Zm00001eb109370;Zm00001eb367110	3	Zm00001eb109370	1	Zm00001eb251960;Zm00001eb367110	2
Biological process	GO:0006986	response to unfolded protein	0.510063	Zm00001eb148420	1	Zm00001eb148420	1	--	0
Biological process	GO:1901002	positive regulation of response to salt stress	0.510063	Zm00001eb212120	1	--	0	Zm00001eb212120	1
Biological process	GO:0008202	steroid metabolic process	0.513677	Zm00001eb300570;Zm00001eb135830	2	Zm00001eb300570;Zm00001eb135830	2	--	0
Biological process	GO:0010410	hemicellulose metabolic process	0.514022	Zm00001eb341630;Zm00001eb071650;Zm00001eb430420	3	Zm00001eb430420	1	Zm00001eb341630;Zm00001eb071650	2
Biological process	GO:0009746	response to hexose	0.515501	Zm00001eb006260	1	--	0	Zm00001eb006260	1
Biological process	GO:0015977	carbon fixation	0.515501	Zm00001eb092540	1	--	0	Zm00001eb092540	1
Biological process	GO:0032392	DNA geometric change	0.515501	Zm00001eb043290	1	--	0	Zm00001eb043290	1
Biological process	GO:0032508	DNA duplex unwinding	0.515501	Zm00001eb043290	1	--	0	Zm00001eb043290	1
Biological process	GO:0010073	meristem maintenance	0.519449	Zm00001eb428330;Zm00001eb150860;Zm00001eb101560	3	Zm00001eb428330;Zm00001eb150860;Zm00001eb101560	3	--	0
Biological process	GO:0009559	embryo sac central cell differentiation	0.520879	Zm00001eb132840	1	--	0	Zm00001eb132840	1
Biological process	GO:0009631	cold acclimation	0.520879	Zm00001eb285360	1	Zm00001eb285360	1	--	0
Biological process	GO:0010311	lateral root formation	0.520879	Zm00001eb166250	1	Zm00001eb166250	1	--	0
Biological process	GO:0048449	floral organ formation	0.520879	Zm00001eb100380	1	--	0	Zm00001eb100380	1
Biological process	GO:0061647	histone H3-K9 modification	0.520879	Zm00001eb113970	1	Zm00001eb113970	1	--	0
Biological process	GO:0006626	protein targeting to mitochondrion	0.526198	Zm00001eb308440	1	Zm00001eb308440	1	--	0
Biological process	GO:0032196	transposition	0.526198	novel.1743	1	--	0	novel.1743	1
Biological process	GO:0098876	vesicle-mediated transport to the plasma membrane	0.526198	novel.858	1	novel.858	1	--	0
Biological process	GO:0000724	double-strand break repair via homologous recombination	0.52731	Zm00001eb043290;Zm00001eb226220	2	Zm00001eb226220	1	Zm00001eb043290	1
Biological process	GO:0009640	photomorphogenesis	0.530678	Zm00001eb235510;Zm00001eb023350	2	Zm00001eb023350	1	Zm00001eb235510	1
Biological process	GO:0000725	recombinational repair	0.53403	Zm00001eb043290;Zm00001eb226220	2	Zm00001eb226220	1	Zm00001eb043290	1
Biological process	GO:0009267	cellular response to starvation	0.53403	Zm00001eb415520;Zm00001eb420440	2	--	0	Zm00001eb415520;Zm00001eb420440	2
Biological process	GO:0006310	DNA recombination	0.536954	novel.67;novel.666;Zm00001eb043290;Zm00001eb226220;novel.1743	5	Zm00001eb226220	1	novel.67;novel.666;Zm00001eb043290;novel.1743	4
Biological process	GO:0046488	phosphatidylinositol metabolic process	0.537365	Zm00001eb343470;Zm00001eb311920	2	Zm00001eb343470	1	Zm00001eb311920	1
Biological process	GO:0016998	cell wall macromolecule catabolic process	0.541804	Zm00001eb272090	1	Zm00001eb272090	1	--	0
Biological process	GO:0043255	regulation of carbohydrate biosynthetic process	0.541804	Zm00001eb373370	1	--	0	Zm00001eb373370	1
Biological process	GO:0043647	inositol phosphate metabolic process	0.541804	Zm00001eb311920	1	--	0	Zm00001eb311920	1
Biological process	GO:0070585	protein localization to mitochondrion	0.541804	Zm00001eb308440	1	Zm00001eb308440	1	--	0
Biological process	GO:0072655	establishment of protein localization to mitochondrion	0.541804	Zm00001eb308440	1	Zm00001eb308440	1	--	0
Biological process	GO:0032881	regulation of polysaccharide metabolic process	0.546891	Zm00001eb373370	1	--	0	Zm00001eb373370	1
Biological process	GO:0034284	response to monosaccharide	0.546891	Zm00001eb006260	1	--	0	Zm00001eb006260	1
Biological process	GO:0009247	glycolipid biosynthetic process	0.551922	Zm00001eb034810	1	Zm00001eb034810	1	--	0
Biological process	GO:0035303	regulation of dephosphorylation	0.551922	Zm00001eb390860	1	Zm00001eb390860	1	--	0
Biological process	GO:0071472	cellular response to salt stress	0.551922	Zm00001eb311920	1	--	0	Zm00001eb311920	1
Biological process	GO:0000904	cell morphogenesis involved in differentiation	0.55297	Zm00001eb225410;novel.1881;Zm00001eb300570;Zm00001eb101560	4	Zm00001eb300570;Zm00001eb101560	2	Zm00001eb225410;novel.1881	2
Biological process	GO:0051640	organelle localization	0.553905	Zm00001eb416660;Zm00001eb163740;Zm00001eb006320	3	--	0	Zm00001eb416660;Zm00001eb163740;Zm00001eb006320	3
Biological process	GO:0071482	cellular response to light stimulus	0.55703	Zm00001eb235510;Zm00001eb333260	2	--	0	Zm00001eb235510;Zm00001eb333260	2
Biological process	GO:0034655	nucleobase-containing compound catabolic process	0.55742	Zm00001eb065660;Zm00001eb032010;novel.451;Zm00001eb125480	4	Zm00001eb125480	1	Zm00001eb065660;Zm00001eb032010;novel.451	3
Biological process	GO:0009798	axis specification	0.561818	Zm00001eb350150	1	--	0	Zm00001eb350150	1
Biological process	GO:0000910	cytokinesis	0.563453	Zm00001eb323760;Zm00001eb040830	2	Zm00001eb323760	1	Zm00001eb040830	1
Biological process	GO:0007029	endoplasmic reticulum organization	0.566684	Zm00001eb416660	1	--	0	Zm00001eb416660	1
Biological process	GO:0009404	toxin metabolic process	0.566684	Zm00001eb009250	1	--	0	Zm00001eb009250	1
Biological process	GO:0070417	cellular response to cold	0.566684	Zm00001eb193550	1	--	0	Zm00001eb193550	1
Biological process	GO:0006486	protein glycosylation	0.566762	Zm00001eb077930;Zm00001eb003630;Zm00001eb046610	3	Zm00001eb003630;Zm00001eb046610	2	Zm00001eb077930	1
Biological process	GO:0043413	macromolecule glycosylation	0.566762	Zm00001eb077930;Zm00001eb003630;Zm00001eb046610	3	Zm00001eb003630;Zm00001eb046610	2	Zm00001eb077930	1
Biological process	GO:0006869	lipid transport	0.569808	Zm00001eb000850;Zm00001eb205350	2	Zm00001eb000850;Zm00001eb205350	2	--	0
Biological process	GO:0051274	beta-glucan biosynthetic process	0.569808	Zm00001eb323760;Zm00001eb040830	2	Zm00001eb323760	1	Zm00001eb040830	1
Biological process	GO:0010228	vegetative to reproductive phase transition of meristem	0.57072	Zm00001eb390860;Zm00001eb181410;Zm00001eb291540;Zm00001eb230840;Zm00001eb029370	5	Zm00001eb390860;Zm00001eb230840;Zm00001eb029370	3	Zm00001eb181410;Zm00001eb291540	2
Biological process	GO:0009718	anthocyanin-containing compound biosynthetic process	0.571496	Zm00001eb159020	1	--	0	Zm00001eb159020	1
Biological process	GO:0051084	'de novo' post-translational protein folding	0.571496	Zm00001eb148420	1	Zm00001eb148420	1	--	0
Biological process	GO:0051085	chaperone cofactor-dependent protein refolding	0.571496	Zm00001eb148420	1	Zm00001eb148420	1	--	0
Biological process	GO:0009408	response to heat	0.574982	Zm00001eb341630;Zm00001eb193550;Zm00001eb148420;Zm00001eb285760	4	Zm00001eb148420;Zm00001eb285760	2	Zm00001eb341630;Zm00001eb193550	2
Biological process	GO:0010192	mucilage biosynthetic process	0.576254	Zm00001eb341770	1	--	0	Zm00001eb341770	1
Biological process	GO:0022406	membrane docking	0.576254	Zm00001eb416660	1	--	0	Zm00001eb416660	1
Biological process	GO:0045927	positive regulation of growth	0.576254	novel.851	1	--	0	novel.851	1
Biological process	GO:0140056	organelle localization by membrane tethering	0.576254	Zm00001eb416660	1	--	0	Zm00001eb416660	1
Biological process	GO:0006664	glycolipid metabolic process	0.58096	Zm00001eb034810	1	Zm00001eb034810	1	--	0
Biological process	GO:0010214	seed coat development	0.58096	Zm00001eb341770	1	--	0	Zm00001eb341770	1
Biological process	GO:0016126	sterol biosynthetic process	0.58096	Zm00001eb135830	1	Zm00001eb135830	1	--	0
Biological process	GO:0071103	DNA conformation change	0.58096	Zm00001eb043290	1	--	0	Zm00001eb043290	1
Biological process	GO:1903509	liposaccharide metabolic process	0.58096	Zm00001eb034810	1	Zm00001eb034810	1	--	0
Biological process	GO:0030243	cellulose metabolic process	0.582318	Zm00001eb323760;Zm00001eb040830	2	Zm00001eb323760	1	Zm00001eb040830	1
Biological process	GO:0071478	cellular response to radiation	0.582318	Zm00001eb235510;Zm00001eb333260	2	--	0	Zm00001eb235510;Zm00001eb333260	2
Biological process	GO:0006885	regulation of pH	0.585614	Zm00001eb381570	1	Zm00001eb381570	1	--	0
Biological process	GO:0022412	cellular process involved in reproduction in multicellular organism	0.585614	Zm00001eb300570	1	Zm00001eb300570	1	--	0
Biological process	GO:0034762	regulation of transmembrane transport	0.585614	Zm00001eb361550	1	Zm00001eb361550	1	--	0
Biological process	GO:0042255	ribosome assembly	0.585614	Zm00001eb413490	1	--	0	Zm00001eb413490	1
Biological process	GO:0009101	glycoprotein biosynthetic process	0.586856	Zm00001eb077930;Zm00001eb003630;Zm00001eb046610	3	Zm00001eb003630;Zm00001eb046610	2	Zm00001eb077930	1
Biological process	GO:0044036	cell wall macromolecule metabolic process	0.587894	Zm00001eb341630;Zm00001eb071650;Zm00001eb272090;Zm00001eb430420	4	Zm00001eb272090;Zm00001eb430420	2	Zm00001eb341630;Zm00001eb071650	2
Biological process	GO:0140352	export from cell	0.589326	novel.858;Zm00001eb106010;Zm00001eb343090	3	novel.858	1	Zm00001eb106010;Zm00001eb343090	2
Biological process	GO:0070085	glycosylation	0.594237	Zm00001eb077930;Zm00001eb003630;Zm00001eb046610	3	Zm00001eb003630;Zm00001eb046610	2	Zm00001eb077930	1
Biological process	GO:0032786	positive regulation of DNA-templated transcription, elongation	0.594768	Zm00001eb231420	1	--	0	Zm00001eb231420	1
Biological process	GO:0042026	protein refolding	0.594768	Zm00001eb148420	1	Zm00001eb148420	1	--	0
Biological process	GO:2000030	regulation of response to red or far red light	0.594768	Zm00001eb235510	1	--	0	Zm00001eb235510	1
Biological process	GO:0031669	cellular response to nutrient levels	0.597577	Zm00001eb415520;Zm00001eb420440	2	--	0	Zm00001eb415520;Zm00001eb420440	2
Biological process	GO:0006458	'de novo' protein folding	0.59927	Zm00001eb148420	1	Zm00001eb148420	1	--	0
Biological process	GO:0071470	cellular response to osmotic stress	0.59927	Zm00001eb311920	1	--	0	Zm00001eb311920	1
Biological process	GO:0000723	telomere maintenance	0.603721	Zm00001eb043290	1	--	0	Zm00001eb043290	1
Biological process	GO:0006839	mitochondrial transport	0.603721	Zm00001eb308440	1	Zm00001eb308440	1	--	0
Biological process	GO:0010941	regulation of cell death	0.60653	Zm00001eb172290;Zm00001eb430040	2	Zm00001eb430040	1	Zm00001eb172290	1
Biological process	GO:0010075	regulation of meristem growth	0.608123	Zm00001eb101560	1	Zm00001eb101560	1	--	0
Biological process	GO:2000012	regulation of auxin polar transport	0.608123	Zm00001eb100380	1	--	0	Zm00001eb100380	1
Biological process	GO:0042440	pigment metabolic process	0.611125	Zm00001eb119410;Zm00001eb159020;novel.484	3	Zm00001eb119410	1	Zm00001eb159020;novel.484	2
Biological process	GO:0009735	response to cytokinin	0.612415	Zm00001eb418490;Zm00001eb285760	2	Zm00001eb418490;Zm00001eb285760	2	--	0
Biological process	GO:0009856	pollination	0.613021	novel.1881;novel.858;Zm00001eb009250;Zm00001eb101560	4	novel.858;Zm00001eb101560	2	novel.1881;Zm00001eb009250	2
Biological process	GO:0044706	multi-multicellular organism process	0.613021	novel.1881;novel.858;Zm00001eb009250;Zm00001eb101560	4	novel.858;Zm00001eb101560	2	novel.1881;Zm00001eb009250	2
Biological process	GO:0009100	glycoprotein metabolic process	0.613499	Zm00001eb077930;Zm00001eb003630;Zm00001eb046610	3	Zm00001eb003630;Zm00001eb046610	2	Zm00001eb077930	1
Biological process	GO:0010876	lipid localization	0.615332	Zm00001eb000850;Zm00001eb205350	2	Zm00001eb000850;Zm00001eb205350	2	--	0
Biological process	GO:0006650	glycerophospholipid metabolic process	0.615863	Zm00001eb343470;Zm00001eb311920;Zm00001eb413200	3	Zm00001eb343470;Zm00001eb413200	2	Zm00001eb311920	1
Biological process	GO:0010102	lateral root morphogenesis	0.616782	Zm00001eb166250	1	Zm00001eb166250	1	--	0
Biological process	GO:0043269	regulation of ion transport	0.616782	Zm00001eb361550	1	Zm00001eb361550	1	--	0
Biological process	GO:0010101	post-embryonic root morphogenesis	0.621039	Zm00001eb166250	1	Zm00001eb166250	1	--	0
Biological process	GO:0010191	mucilage metabolic process	0.621039	Zm00001eb341770	1	--	0	Zm00001eb341770	1
Biological process	GO:0048440	carpel development	0.621039	Zm00001eb100380	1	--	0	Zm00001eb100380	1
Biological process	GO:0034605	cellular response to heat	0.625249	Zm00001eb193550	1	--	0	Zm00001eb193550	1
Biological process	GO:0051336	regulation of hydrolase activity	0.625249	Zm00001eb390860	1	Zm00001eb390860	1	--	0
Biological process	GO:0006997	nucleus organization	0.629413	Zm00001eb132840	1	--	0	Zm00001eb132840	1
Biological process	GO:0000079	regulation of cyclin-dependent protein serine/threonine kinase activity	0.633531	Zm00001eb400550	1	Zm00001eb400550	1	--	0
Biological process	GO:0010090	trichome morphogenesis	0.633531	Zm00001eb225410	1	--	0	Zm00001eb225410	1
Biological process	GO:0032200	telomere organization	0.633531	Zm00001eb043290	1	--	0	Zm00001eb043290	1
Biological process	GO:0051510	regulation of unidimensional cell growth	0.633531	Zm00001eb101560	1	Zm00001eb101560	1	--	0
Biological process	GO:1904029	regulation of cyclin-dependent protein kinase activity	0.633531	Zm00001eb400550	1	Zm00001eb400550	1	--	0
Biological process	GO:0019953	sexual reproduction	0.635282	Zm00001eb306350;Zm00001eb023350	2	Zm00001eb023350	1	Zm00001eb306350	1
Biological process	GO:0031331	positive regulation of cellular catabolic process	0.638066	Zm00001eb065660;novel.451	2	--	0	Zm00001eb065660;novel.451	2
Biological process	GO:0009853	photorespiration	0.64163	Zm00001eb092540	1	--	0	Zm00001eb092540	1
Biological process	GO:0009627	systemic acquired resistance	0.645612	Zm00001eb364930	1	Zm00001eb364930	1	--	0
Biological process	GO:0090697	post-embryonic plant organ morphogenesis	0.646315	Zm00001eb100380;Zm00001eb166250	2	Zm00001eb166250	1	Zm00001eb100380	1
Biological process	GO:0009991	response to extracellular stimulus	0.648897	Zm00001eb415520;Zm00001eb393560;Zm00001eb420440;Zm00001eb006260	4	--	0	Zm00001eb415520;Zm00001eb393560;Zm00001eb420440;Zm00001eb006260	4
Biological process	GO:0000956	nuclear-transcribed mRNA catabolic process	0.649032	Zm00001eb065660;novel.451	2	--	0	Zm00001eb065660;novel.451	2
Biological process	GO:0010675	regulation of cellular carbohydrate metabolic process	0.64955	Zm00001eb373370	1	--	0	Zm00001eb373370	1
Biological process	GO:0051607	defense response to virus	0.64955	Zm00001eb434140	1	--	0	Zm00001eb434140	1
Biological process	GO:0090501	RNA phosphodiester bond hydrolysis	0.64955	Zm00001eb125480	1	Zm00001eb125480	1	--	0
Biological process	GO:0140546	defense response to symbiont	0.64955	Zm00001eb434140	1	--	0	Zm00001eb434140	1
Biological process	GO:0006898	receptor-mediated endocytosis	0.653445	Zm00001eb311920	1	--	0	Zm00001eb311920	1
Biological process	GO:0009860	pollen tube growth	0.654416	novel.1881;Zm00001eb101560	2	Zm00001eb101560	1	novel.1881	1
Biological process	GO:0009967	positive regulation of signal transduction	0.657084	Zm00001eb368340;Zm00001eb234690	2	Zm00001eb368340	1	Zm00001eb234690	1
Biological process	GO:0032784	regulation of DNA-templated transcription elongation	0.657297	Zm00001eb231420	1	--	0	Zm00001eb231420	1
Biological process	GO:0043085	positive regulation of catalytic activity	0.657297	Zm00001eb425100	1	--	0	Zm00001eb425100	1
Biological process	GO:0071900	regulation of protein serine/threonine kinase activity	0.657297	Zm00001eb400550	1	Zm00001eb400550	1	--	0
Biological process	GO:0023056	positive regulation of signaling	0.659734	Zm00001eb368340;Zm00001eb234690	2	Zm00001eb368340	1	Zm00001eb234690	1
Biological process	GO:0006892	post-Golgi vesicle-mediated transport	0.661105	novel.858	1	novel.858	1	--	0
Biological process	GO:0055072	iron ion homeostasis	0.661105	Zm00001eb360150	1	--	0	Zm00001eb360150	1
Biological process	GO:0071214	cellular response to abiotic stimulus	0.667528	Zm00001eb235510;Zm00001eb333260;Zm00001eb311920	3	--	0	Zm00001eb235510;Zm00001eb333260;Zm00001eb311920	3
Biological process	GO:0104004	cellular response to environmental stimulus	0.667528	Zm00001eb235510;Zm00001eb333260;Zm00001eb311920	3	--	0	Zm00001eb235510;Zm00001eb333260;Zm00001eb311920	3
Biological process	GO:0006400	tRNA modification	0.668597	Zm00001eb032010	1	--	0	Zm00001eb032010	1
Biological process	GO:0007166	cell surface receptor signaling pathway	0.668597	Zm00001eb350600	1	Zm00001eb350600	1	--	0
Biological process	GO:0046283	anthocyanin-containing compound metabolic process	0.668597	Zm00001eb159020	1	--	0	Zm00001eb159020	1
Biological process	GO:0006346	DNA methylation-dependent heterochromatin formation	0.672281	Zm00001eb113970	1	Zm00001eb113970	1	--	0
Biological process	GO:0046686	response to cadmium ion	0.672281	novel.1262	1	novel.1262	1	--	0
Biological process	GO:0009896	positive regulation of catabolic process	0.672743	Zm00001eb065660;novel.451	2	--	0	Zm00001eb065660;novel.451	2
Biological process	GO:0009639	response to red or far red light	0.673881	Zm00001eb235510;Zm00001eb333260;Zm00001eb023350	3	Zm00001eb023350	1	Zm00001eb235510;Zm00001eb333260	2
Biological process	GO:0006081	cellular aldehyde metabolic process	0.675924	Zm00001eb413220	1	--	0	Zm00001eb413220	1
Biological process	GO:0072329	monocarboxylic acid catabolic process	0.675924	Zm00001eb251960	1	--	0	Zm00001eb251960	1
Biological process	GO:0140718	facultative heterochromatin formation	0.675924	Zm00001eb113970	1	Zm00001eb113970	1	--	0
Biological process	GO:1903311	regulation of mRNA metabolic process	0.677833	Zm00001eb065660;novel.451	2	--	0	Zm00001eb065660;novel.451	2
Biological process	GO:0048509	regulation of meristem development	0.679526	Zm00001eb160700	1	--	0	Zm00001eb160700	1
Biological process	GO:0002229	defense response to oomycetes	0.683089	Zm00001eb174500	1	Zm00001eb174500	1	--	0
Biological process	GO:0051258	protein polymerization	0.683089	Zm00001eb350150	1	--	0	Zm00001eb350150	1
Biological process	GO:0051259	protein complex oligomerization	0.683089	novel.2063	1	--	0	novel.2063	1
Biological process	GO:0010383	cell wall polysaccharide metabolic process	0.686318	Zm00001eb341630;Zm00001eb071650;Zm00001eb430420	3	Zm00001eb430420	1	Zm00001eb341630;Zm00001eb071650	2
Biological process	GO:0019684	photosynthesis, light reaction	0.68782	Zm00001eb273380;Zm00001eb324090	2	--	0	Zm00001eb273380;Zm00001eb324090	2
Biological process	GO:0051273	beta-glucan metabolic process	0.68782	Zm00001eb323760;Zm00001eb040830	2	Zm00001eb323760	1	Zm00001eb040830	1
Biological process	GO:0006887	exocytosis	0.690096	novel.858	1	novel.858	1	--	0
Biological process	GO:0009624	response to nematode	0.690096	Zm00001eb249290	1	--	0	Zm00001eb249290	1
Biological process	GO:0061077	chaperone-mediated protein folding	0.690096	Zm00001eb148420	1	Zm00001eb148420	1	--	0
Biological process	GO:0045859	regulation of protein kinase activity	0.693542	Zm00001eb400550	1	Zm00001eb400550	1	--	0
Biological process	GO:0009832	plant-type cell wall biogenesis	0.69641	Zm00001eb323760;Zm00001eb040830;Zm00001eb149450	3	Zm00001eb323760	1	Zm00001eb040830;Zm00001eb149450	2
Biological process	GO:0042542	response to hydrogen peroxide	0.696949	Zm00001eb425100	1	--	0	Zm00001eb425100	1
Biological process	GO:0009553	embryo sac development	0.697552	Zm00001eb425100;Zm00001eb132840	2	--	0	Zm00001eb425100;Zm00001eb132840	2
Biological process	GO:1905393	plant organ formation	0.697552	Zm00001eb100380;Zm00001eb166250	2	Zm00001eb166250	1	Zm00001eb100380	1
Biological process	GO:0006260	DNA replication	0.698399	Zm00001eb043280;Zm00001eb043290;Zm00001eb226220	3	Zm00001eb226220	1	Zm00001eb043280;Zm00001eb043290	2
Biological process	GO:0035266	meristem growth	0.700319	Zm00001eb101560	1	Zm00001eb101560	1	--	0
Biological process	GO:2000377	regulation of reactive oxygen species metabolic process	0.700319	Zm00001eb311920	1	--	0	Zm00001eb311920	1
Biological process	GO:0009845	seed germination	0.702323	Zm00001eb023350;Zm00001eb291540	2	Zm00001eb023350	1	Zm00001eb291540	1
Biological process	GO:0015994	chlorophyll metabolic process	0.703651	Zm00001eb119410	1	Zm00001eb119410	1	--	0
Biological process	GO:0048444	floral organ morphogenesis	0.703651	Zm00001eb100380	1	--	0	Zm00001eb100380	1
Biological process	GO:0007018	microtubule-based movement	0.706946	Zm00001eb413230	1	--	0	Zm00001eb413230	1
Biological process	GO:0009744	response to sucrose	0.710205	Zm00001eb006260	1	--	0	Zm00001eb006260	1
Biological process	GO:0051302	regulation of cell division	0.710205	Zm00001eb350150	1	--	0	Zm00001eb350150	1
Biological process	GO:0006661	phosphatidylinositol biosynthetic process	0.713428	Zm00001eb343470	1	Zm00001eb343470	1	--	0
Biological process	GO:0035967	cellular response to topologically incorrect protein	0.713428	Zm00001eb148420	1	Zm00001eb148420	1	--	0
Biological process	GO:0045944	positive regulation of transcription by RNA polymerase II	0.713979	Zm00001eb235510;Zm00001eb423130	2	--	0	Zm00001eb235510;Zm00001eb423130	2
Biological process	GO:0015849	organic acid transport	0.716264	Zm00001eb161250;Zm00001eb189540	2	--	0	Zm00001eb161250;Zm00001eb189540	2
Biological process	GO:0046148	pigment biosynthetic process	0.716264	Zm00001eb159020;novel.484	2	--	0	Zm00001eb159020;novel.484	2
Biological process	GO:0034285	response to disaccharide	0.716615	Zm00001eb006260	1	--	0	Zm00001eb006260	1
Biological process	GO:0042273	ribosomal large subunit biogenesis	0.719766	Zm00001eb413490	1	--	0	Zm00001eb413490	1
Biological process	GO:0048586	regulation of long-day photoperiodism, flowering	0.719766	Zm00001eb230840	1	Zm00001eb230840	1	--	0
Biological process	GO:0009789	positive regulation of abscisic acid-activated signaling pathway	0.722883	Zm00001eb368340	1	Zm00001eb368340	1	--	0
Biological process	GO:0055067	monovalent inorganic cation homeostasis	0.722883	Zm00001eb381570	1	Zm00001eb381570	1	--	0
Biological process	GO:1900424	regulation of defense response to bacterium	0.722883	Zm00001eb309760	1	--	0	Zm00001eb309760	1
Biological process	GO:0009743	response to carbohydrate	0.723026	Zm00001eb425100;Zm00001eb006260	2	--	0	Zm00001eb425100;Zm00001eb006260	2
Biological process	GO:0046486	glycerolipid metabolic process	0.727056	Zm00001eb343470;Zm00001eb311920;Zm00001eb413200	3	Zm00001eb343470;Zm00001eb413200	2	Zm00001eb311920	1
Biological process	GO:0050790	regulation of catalytic activity	0.727056	Zm00001eb425100;Zm00001eb390860;Zm00001eb400550	3	Zm00001eb390860;Zm00001eb400550	2	Zm00001eb425100	1
Biological process	GO:0001932	regulation of protein phosphorylation	0.729013	Zm00001eb400550	1	Zm00001eb400550	1	--	0
Biological process	GO:0008037	cell recognition	0.729013	novel.858	1	novel.858	1	--	0
Biological process	GO:0048544	recognition of pollen	0.729013	novel.858	1	novel.858	1	--	0
Biological process	GO:0019220	regulation of phosphate metabolic process	0.729653	Zm00001eb390860;Zm00001eb400550	2	Zm00001eb390860;Zm00001eb400550	2	--	0
Biological process	GO:0045488	pectin metabolic process	0.729653	Zm00001eb373370;Zm00001eb051970	2	--	0	Zm00001eb373370;Zm00001eb051970	2
Biological process	GO:0048638	regulation of developmental growth	0.729653	Zm00001eb005500;Zm00001eb101560	2	Zm00001eb005500;Zm00001eb101560	2	--	0
Biological process	GO:0051174	regulation of phosphorus metabolic process	0.729653	Zm00001eb390860;Zm00001eb400550	2	Zm00001eb390860;Zm00001eb400550	2	--	0
Biological process	GO:0048507	meristem development	0.731805	Zm00001eb160700;Zm00001eb428330;Zm00001eb150860;Zm00001eb101560	4	Zm00001eb428330;Zm00001eb150860;Zm00001eb101560	3	Zm00001eb160700	1
Biological process	GO:0031329	regulation of cellular catabolic process	0.731832	Zm00001eb065660;novel.451	2	--	0	Zm00001eb065660;novel.451	2
Biological process	GO:0043549	regulation of kinase activity	0.737956	Zm00001eb400550	1	Zm00001eb400550	1	--	0
Biological process	GO:0010393	galacturonan metabolic process	0.73828	Zm00001eb373370;Zm00001eb051970	2	--	0	Zm00001eb373370;Zm00001eb051970	2
Biological process	GO:0048438	floral whorl development	0.73828	Zm00001eb100380;Zm00001eb230840	2	Zm00001eb230840	1	Zm00001eb100380	1
Biological process	GO:0016579	protein deubiquitination	0.743754	Zm00001eb357270	1	Zm00001eb357270	1	--	0
Biological process	GO:0035966	response to topologically incorrect protein	0.743754	Zm00001eb148420	1	Zm00001eb148420	1	--	0
Biological process	GO:0006631	fatty acid metabolic process	0.744352	Zm00001eb316920;Zm00001eb374630;Zm00001eb267640;Zm00001eb413200	4	Zm00001eb316920;Zm00001eb374630;Zm00001eb413200	3	Zm00001eb267640	1
Biological process	GO:0006354	DNA-templated transcription elongation	0.746605	Zm00001eb231420	1	--	0	Zm00001eb231420	1
Biological process	GO:0009561	megagametogenesis	0.749424	Zm00001eb132840	1	--	0	Zm00001eb132840	1
Biological process	GO:0044093	positive regulation of molecular function	0.749424	Zm00001eb425100	1	--	0	Zm00001eb425100	1
Biological process	GO:0006633	fatty acid biosynthetic process	0.754831	Zm00001eb267640;Zm00001eb413200	2	Zm00001eb413200	1	Zm00001eb267640	1
Biological process	GO:0000278	mitotic cell cycle	0.756448	Zm00001eb400520;Zm00001eb323760;Zm00001eb040830;Zm00001eb400550	4	Zm00001eb400520;Zm00001eb323760;Zm00001eb400550	3	Zm00001eb040830	1
Biological process	GO:0016125	sterol metabolic process	0.757696	Zm00001eb135830	1	Zm00001eb135830	1	--	0
Biological process	GO:0009250	glucan biosynthetic process	0.764713	Zm00001eb323760;Zm00001eb040830	2	Zm00001eb323760	1	Zm00001eb040830	1
Biological process	GO:0090626	plant epidermis morphogenesis	0.765695	Zm00001eb225410	1	--	0	Zm00001eb225410	1
Biological process	GO:0015979	photosynthesis	0.7681	Zm00001eb273380;Zm00001eb405610;Zm00001eb092540;Zm00001eb324090	4	Zm00001eb405610	1	Zm00001eb273380;Zm00001eb092540;Zm00001eb324090	3
Biological process	GO:0032535	regulation of cellular component size	0.768303	Zm00001eb350600	1	Zm00001eb350600	1	--	0
Biological process	GO:0090066	regulation of anatomical structure size	0.768303	Zm00001eb350600	1	Zm00001eb350600	1	--	0
Biological process	GO:0000272	polysaccharide catabolic process	0.768568	Zm00001eb047940;Zm00001eb272090	2	Zm00001eb272090	1	Zm00001eb047940	1
Biological process	GO:0009909	regulation of flower development	0.768568	Zm00001eb259000;Zm00001eb181410	2	--	0	Zm00001eb259000;Zm00001eb181410	2
Biological process	GO:0009932	cell tip growth	0.770475	novel.1881;Zm00001eb101560	2	Zm00001eb101560	1	novel.1881	1
Biological process	GO:0046434	organophosphate catabolic process	0.770882	Zm00001eb311920	1	--	0	Zm00001eb311920	1
Biological process	GO:0009826	unidimensional cell growth	0.772357	novel.1881;Zm00001eb300570;Zm00001eb101560;Zm00001eb350600	4	Zm00001eb300570;Zm00001eb101560;Zm00001eb350600	3	novel.1881	1
Biological process	GO:0051128	regulation of cellular component organization	0.773762	Zm00001eb330730;Zm00001eb111590;Zm00001eb101560;Zm00001eb311920	4	Zm00001eb101560	1	Zm00001eb330730;Zm00001eb111590;Zm00001eb311920	3
Biological process	GO:0006778	porphyrin-containing compound metabolic process	0.775953	Zm00001eb119410	1	Zm00001eb119410	1	--	0
Biological process	GO:0033013	tetrapyrrole metabolic process	0.778447	Zm00001eb119410	1	Zm00001eb119410	1	--	0
Biological process	GO:0000271	polysaccharide biosynthetic process	0.779314	Zm00001eb373370;Zm00001eb051970;Zm00001eb323760;Zm00001eb040830	4	Zm00001eb323760	1	Zm00001eb373370;Zm00001eb051970;Zm00001eb040830	3
Biological process	GO:0006402	mRNA catabolic process	0.781632	Zm00001eb065660;novel.451	2	--	0	Zm00001eb065660;novel.451	2
Biological process	GO:0048574	long-day photoperiodism, flowering	0.783352	Zm00001eb230840	1	Zm00001eb230840	1	--	0
Biological process	GO:0090351	seedling development	0.78703	Zm00001eb023350;Zm00001eb291540	2	Zm00001eb023350	1	Zm00001eb291540	1
Biological process	GO:0015698	inorganic anion transport	0.788149	Zm00001eb119430	1	Zm00001eb119430	1	--	0
Biological process	GO:1903047	mitotic cell cycle process	0.788624	Zm00001eb323760;Zm00001eb040830;Zm00001eb400550	3	Zm00001eb323760;Zm00001eb400550	2	Zm00001eb040830	1
Biological process	GO:0009736	cytokinin-activated signaling pathway	0.790507	Zm00001eb418490	1	Zm00001eb418490	1	--	0
Biological process	GO:0046777	protein autophosphorylation	0.794538	Zm00001eb309760;Zm00001eb368340;Zm00001eb009250	3	Zm00001eb368340	1	Zm00001eb309760;Zm00001eb009250	2
Biological process	GO:0048588	developmental cell growth	0.797477	novel.1881;Zm00001eb101560	2	Zm00001eb101560	1	novel.1881	1
Biological process	GO:0032940	secretion by cell	0.799683	novel.858	1	novel.858	1	--	0
Biological process	GO:0022604	regulation of cell morphogenesis	0.801913	Zm00001eb101560	1	Zm00001eb101560	1	--	0
Biological process	GO:0071368	cellular response to cytokinin stimulus	0.801913	Zm00001eb418490	1	Zm00001eb418490	1	--	0
Biological process	GO:0051604	protein maturation	0.804119	Zm00001eb085620	1	--	0	Zm00001eb085620	1
Biological process	GO:0031668	cellular response to extracellular stimulus	0.804188	Zm00001eb415520;Zm00001eb420440	2	--	0	Zm00001eb415520;Zm00001eb420440	2
Biological process	GO:0042325	regulation of phosphorylation	0.8063	Zm00001eb400550	1	Zm00001eb400550	1	--	0
Biological process	GO:0044087	regulation of cellular component biogenesis	0.808457	Zm00001eb149450	1	--	0	Zm00001eb149450	1
Biological process	GO:0048571	long-day photoperiodism	0.808457	Zm00001eb230840	1	Zm00001eb230840	1	--	0
Biological process	GO:0090305	nucleic acid phosphodiester bond hydrolysis	0.808457	Zm00001eb125480	1	Zm00001eb125480	1	--	0
Biological process	GO:0008033	tRNA processing	0.810591	Zm00001eb032010	1	--	0	Zm00001eb032010	1
Biological process	GO:0010150	leaf senescence	0.810701	Zm00001eb009250;Zm00001eb358680	2	--	0	Zm00001eb009250;Zm00001eb358680	2
Biological process	GO:0043414	macromolecule methylation	0.811461	Zm00001eb329350;Zm00001eb113970;Zm00001eb329320	3	Zm00001eb113970	1	Zm00001eb329350;Zm00001eb329320	2
Biological process	GO:0048868	pollen tube development	0.813885	novel.1881;Zm00001eb101560	2	Zm00001eb101560	1	novel.1881	1
Biological process	GO:0001558	regulation of cell growth	0.814786	Zm00001eb101560	1	Zm00001eb101560	1	--	0
Biological process	GO:0046903	secretion	0.814786	novel.858	1	novel.858	1	--	0
Biological process	GO:0051668	localization within membrane	0.817021	novel.858;Zm00001eb308440	2	novel.858;Zm00001eb308440	2	--	0
Biological process	GO:0043094	cellular metabolic compound salvage	0.822902	Zm00001eb092540	1	--	0	Zm00001eb092540	1
Biological process	GO:0090150	establishment of protein localization to membrane	0.822902	Zm00001eb308440	1	Zm00001eb308440	1	--	0
Biological process	GO:0006401	RNA catabolic process	0.823152	Zm00001eb065660;novel.451	2	--	0	Zm00001eb065660;novel.451	2
Biological process	GO:0010016	shoot system morphogenesis	0.823152	Zm00001eb187340;Zm00001eb187290	2	--	0	Zm00001eb187340;Zm00001eb187290	2
Biological process	GO:0070646	protein modification by small protein removal	0.824874	Zm00001eb357270	1	Zm00001eb357270	1	--	0
Biological process	GO:0009894	regulation of catabolic process	0.826148	Zm00001eb065660;novel.451	2	--	0	Zm00001eb065660;novel.451	2
Biological process	GO:0090693	plant organ senescence	0.826148	Zm00001eb009250;Zm00001eb358680	2	--	0	Zm00001eb009250;Zm00001eb358680	2
Biological process	GO:0065009	regulation of molecular function	0.829705	Zm00001eb425100;Zm00001eb390860;Zm00001eb400550	3	Zm00001eb390860;Zm00001eb400550	2	Zm00001eb425100	1
Biological process	GO:0071496	cellular response to external stimulus	0.832004	Zm00001eb415520;Zm00001eb420440	2	--	0	Zm00001eb415520;Zm00001eb420440	2
Biological process	GO:0030258	lipid modification	0.832549	Zm00001eb311920	1	--	0	Zm00001eb311920	1
Biological process	GO:0031507	heterochromatin formation	0.832549	Zm00001eb113970	1	Zm00001eb113970	1	--	0
Biological process	GO:0044772	mitotic cell cycle phase transition	0.832549	Zm00001eb400550	1	Zm00001eb400550	1	--	0
Biological process	GO:0070828	heterochromatin organization	0.832549	Zm00001eb113970	1	Zm00001eb113970	1	--	0
Biological process	GO:0048284	organelle fusion	0.834415	Zm00001eb132840	1	--	0	Zm00001eb132840	1
Biological process	GO:0072522	purine-containing compound biosynthetic process	0.839889	Zm00001eb312250	1	Zm00001eb312250	1	--	0
Biological process	GO:0048573	photoperiodism, flowering	0.841826	Zm00001eb390860;Zm00001eb230840	2	Zm00001eb390860;Zm00001eb230840	2	--	0
Biological process	GO:0006644	phospholipid metabolic process	0.845274	Zm00001eb343470;Zm00001eb311920;Zm00001eb413200	3	Zm00001eb343470;Zm00001eb413200	2	Zm00001eb311920	1
Biological process	GO:0046467	membrane lipid biosynthetic process	0.848614	Zm00001eb034810	1	Zm00001eb034810	1	--	0
Biological process	GO:0009311	oligosaccharide metabolic process	0.850301	Zm00001eb350600	1	Zm00001eb350600	1	--	0
Biological process	GO:0090698	post-embryonic plant morphogenesis	0.852413	Zm00001eb100380;Zm00001eb166250	2	Zm00001eb166250	1	Zm00001eb100380	1
Biological process	GO:0009834	plant-type secondary cell wall biogenesis	0.85362	Zm00001eb149450	1	--	0	Zm00001eb149450	1
Biological process	GO:0098662	inorganic cation transmembrane transport	0.85362	Zm00001eb381570	1	Zm00001eb381570	1	--	0
Biological process	GO:0009658	chloroplast organization	0.853691	Zm00001eb163740;Zm00001eb006320	2	--	0	Zm00001eb163740;Zm00001eb006320	2
Biological process	GO:0062197	cellular response to chemical stress	0.860039	Zm00001eb311920	1	--	0	Zm00001eb311920	1
Biological process	GO:0010015	root morphogenesis	0.860651	Zm00001eb350150;Zm00001eb166250;Zm00001eb101560	3	Zm00001eb166250;Zm00001eb101560	2	Zm00001eb350150	1
Biological process	GO:0030001	metal ion transport	0.861145	Zm00001eb381570;Zm00001eb274060	2	Zm00001eb381570;Zm00001eb274060	2	--	0
Biological process	GO:0098655	cation transmembrane transport	0.8616	Zm00001eb381570	1	Zm00001eb381570	1	--	0
Biological process	GO:0019751	polyol metabolic process	0.86767	Zm00001eb311920	1	--	0	Zm00001eb311920	1
Biological process	GO:0140694	non-membrane-bounded organelle assembly	0.870605	Zm00001eb413490	1	--	0	Zm00001eb413490	1
Biological process	GO:2000028	regulation of photoperiodism, flowering	0.877661	Zm00001eb230840	1	Zm00001eb230840	1	--	0
Biological process	GO:0009648	photoperiodism	0.878287	Zm00001eb390860;Zm00001eb230840	2	Zm00001eb390860;Zm00001eb230840	2	--	0
Biological process	GO:0031399	regulation of protein modification process	0.882518	Zm00001eb390860;Zm00001eb400550	2	Zm00001eb390860;Zm00001eb400550	2	--	0
Biological process	GO:0044770	cell cycle phase transition	0.883029	Zm00001eb400550	1	Zm00001eb400550	1	--	0
Biological process	GO:0022618	ribonucleoprotein complex assembly	0.884334	Zm00001eb413490	1	--	0	Zm00001eb413490	1
Biological process	GO:0030029	actin filament-based process	0.884334	Zm00001eb163740	1	--	0	Zm00001eb163740	1
Biological process	GO:0016311	dephosphorylation	0.884805	Zm00001eb013450;Zm00001eb390860;Zm00001eb311920	3	Zm00001eb390860	1	Zm00001eb013450;Zm00001eb311920	2
Biological process	GO:0007389	pattern specification process	0.885602	Zm00001eb241870;Zm00001eb350150	2	Zm00001eb241870	1	Zm00001eb350150	1
Biological process	GO:0006643	membrane lipid metabolic process	0.886901	Zm00001eb034810	1	Zm00001eb034810	1	--	0
Biological process	GO:0046474	glycerophospholipid biosynthetic process	0.893072	Zm00001eb343470	1	Zm00001eb343470	1	--	0
Biological process	GO:0051321	meiotic cell cycle	0.893463	Zm00001eb043290;Zm00001eb171920	2	Zm00001eb171920	1	Zm00001eb043290	1
Biological process	GO:0018105	peptidyl-serine phosphorylation	0.896612	Zm00001eb368340	1	Zm00001eb368340	1	--	0
Biological process	GO:0018209	peptidyl-serine modification	0.896612	Zm00001eb368340	1	Zm00001eb368340	1	--	0
Biological process	GO:0071826	ribonucleoprotein complex subunit organization	0.898907	Zm00001eb413490	1	--	0	Zm00001eb413490	1
Biological process	GO:0000302	response to reactive oxygen species	0.903345	Zm00001eb425100	1	--	0	Zm00001eb425100	1
Biological process	GO:0048437	floral organ development	0.905177	Zm00001eb100380;Zm00001eb168040	2	--	0	Zm00001eb100380;Zm00001eb168040	2
Biological process	GO:0034968	histone lysine methylation	0.906547	Zm00001eb113970	1	Zm00001eb113970	1	--	0
Biological process	GO:0072657	protein localization to membrane	0.913611	Zm00001eb308440	1	Zm00001eb308440	1	--	0
Biological process	GO:0061024	membrane organization	0.91414	Zm00001eb416660;Zm00001eb308440	2	Zm00001eb308440	1	Zm00001eb416660	1
Biological process	GO:0007005	mitochondrion organization	0.914576	Zm00001eb308440	1	Zm00001eb308440	1	--	0
Biological process	GO:0000375	RNA splicing, via transesterification reactions	0.914914	Zm00001eb343760;Zm00001eb424430	2	--	0	Zm00001eb343760;Zm00001eb424430	2
Biological process	GO:0000377	RNA splicing, via transesterification reactions with bulged adenosine as nucleophile	0.914914	Zm00001eb343760;Zm00001eb424430	2	--	0	Zm00001eb343760;Zm00001eb424430	2
Biological process	GO:0010256	endomembrane system organization	0.91553	Zm00001eb416660	1	--	0	Zm00001eb416660	1
Biological process	GO:0018205	peptidyl-lysine modification	0.916443	Zm00001eb113970;Zm00001eb085620	2	Zm00001eb113970	1	Zm00001eb085620	1
Biological process	GO:0032504	multicellular organism reproduction	0.916473	Zm00001eb300570	1	Zm00001eb300570	1	--	0
Biological process	GO:0044272	sulfur compound biosynthetic process	0.916473	Zm00001eb009250	1	--	0	Zm00001eb009250	1
Biological process	GO:0006470	protein dephosphorylation	0.917198	Zm00001eb013450;Zm00001eb390860	2	Zm00001eb390860	1	Zm00001eb013450	1
Biological process	GO:0018022	peptidyl-lysine methylation	0.917406	Zm00001eb113970	1	Zm00001eb113970	1	--	0
Biological process	GO:0090558	plant epidermis development	0.920154	Zm00001eb225410;Zm00001eb300570	2	Zm00001eb300570	1	Zm00001eb225410	1
Biological process	GO:0006261	DNA-templated DNA replication	0.92279	Zm00001eb043290	1	--	0	Zm00001eb043290	1
Biological process	GO:0009657	plastid organization	0.923709	Zm00001eb163740;Zm00001eb006320	2	--	0	Zm00001eb163740;Zm00001eb006320	2
Biological process	GO:0034220	ion transmembrane transport	0.923709	Zm00001eb361550;Zm00001eb381570	2	Zm00001eb361550;Zm00001eb381570	2	--	0
Biological process	GO:0033692	cellular polysaccharide biosynthetic process	0.92509	Zm00001eb323760;Zm00001eb040830	2	Zm00001eb323760	1	Zm00001eb040830	1
Biological process	GO:0098660	inorganic ion transmembrane transport	0.925349	Zm00001eb381570	1	Zm00001eb381570	1	--	0
Biological process	GO:0016570	histone modification	0.925771	Zm00001eb267730;Zm00001eb113970	2	Zm00001eb267730;Zm00001eb113970	2	--	0
Biological process	GO:0016571	histone methylation	0.926183	Zm00001eb113970	1	Zm00001eb113970	1	--	0
Biological process	GO:0045017	glycerolipid biosynthetic process	0.929428	Zm00001eb343470	1	Zm00001eb343470	1	--	0
Biological process	GO:0006812	cation transport	0.935314	Zm00001eb381570;Zm00001eb274060	2	Zm00001eb381570;Zm00001eb274060	2	--	0
Biological process	GO:0072521	purine-containing compound metabolic process	0.935908	Zm00001eb032010;Zm00001eb312250	2	Zm00001eb312250	1	Zm00001eb032010	1
Biological process	GO:0070925	organelle assembly	0.940379	Zm00001eb413490	1	--	0	Zm00001eb413490	1
Biological process	GO:0006479	protein methylation	0.943001	Zm00001eb113970	1	Zm00001eb113970	1	--	0
Biological process	GO:0008213	protein alkylation	0.943001	Zm00001eb113970	1	Zm00001eb113970	1	--	0
Biological process	GO:0048646	anatomical structure formation involved in morphogenesis	0.943691	Zm00001eb100380;Zm00001eb166250	2	Zm00001eb166250	1	Zm00001eb100380	1
Biological process	GO:0003002	regionalization	0.948489	Zm00001eb241870	1	Zm00001eb241870	1	--	0
Biological process	GO:0006399	tRNA metabolic process	0.950756	Zm00001eb032010	1	--	0	Zm00001eb032010	1
Biological process	GO:0016052	carbohydrate catabolic process	0.951031	Zm00001eb047940;Zm00001eb272090	2	Zm00001eb272090	1	Zm00001eb047940	1
Biological process	GO:0071695	anatomical structure maturation	0.9555	Zm00001eb055950	1	--	0	Zm00001eb055950	1
Biological process	GO:0034637	cellular carbohydrate biosynthetic process	0.964104	Zm00001eb323760;Zm00001eb040830	2	Zm00001eb323760	1	Zm00001eb040830	1
Biological process	GO:0008654	phospholipid biosynthetic process	0.96642	Zm00001eb343470	1	Zm00001eb343470	1	--	0
Biological process	GO:0021700	developmental maturation	0.967168	Zm00001eb055950	1	--	0	Zm00001eb055950	1
Biological process	GO:0006338	chromatin remodeling	0.9679	Zm00001eb113970	1	Zm00001eb113970	1	--	0
Biological process	GO:0000398	mRNA splicing, via spliceosome	0.968967	Zm00001eb343760	1	--	0	Zm00001eb343760	1
Biological process	GO:0006605	protein targeting	0.971322	Zm00001eb308440	1	Zm00001eb308440	1	--	0
Biological process	GO:0006820	anion transport	0.972894	Zm00001eb119430	1	Zm00001eb119430	1	--	0
Biological process	GO:0051276	chromosome organization	0.976591	Zm00001eb043290	1	--	0	Zm00001eb043290	1
Biological process	GO:0048193	Golgi vesicle transport	0.978852	novel.858	1	novel.858	1	--	0
Biological process	GO:0072594	establishment of protein localization to organelle	0.979785	Zm00001eb308440	1	Zm00001eb308440	1	--	0
Biological process	GO:0051726	regulation of cell cycle	0.983126	Zm00001eb400550	1	Zm00001eb400550	1	--	0
Biological process	GO:0009451	RNA modification	0.98654	Zm00001eb032010	1	--	0	Zm00001eb032010	1
Biological process	GO:0007017	microtubule-based process	0.990082	Zm00001eb413230	1	--	0	Zm00001eb413230	1
Biological process	GO:0009555	pollen development	0.991042	Zm00001eb425100	1	--	0	Zm00001eb425100	1
Biological process	GO:0033365	protein localization to organelle	0.991341	Zm00001eb308440	1	Zm00001eb308440	1	--	0
Biological process	GO:0006457	protein folding	0.991535	Zm00001eb148420	1	Zm00001eb148420	1	--	0
Cellular component	GO:0035102	PRC1 complex	2.05583e-06	novel.897;novel.696;Zm00001eb428330;Zm00001eb150860	4	Zm00001eb428330;Zm00001eb150860	2	novel.897;novel.696	2
Cellular component	GO:0000152	nuclear ubiquitin ligase complex	0.00218263	novel.897;novel.696;Zm00001eb428330;Zm00001eb150860	4	Zm00001eb428330;Zm00001eb150860	2	novel.897;novel.696	2
Cellular component	GO:0031519	PcG protein complex	0.00233533	novel.897;novel.696;Zm00001eb428330;Zm00001eb150860	4	Zm00001eb428330;Zm00001eb150860	2	novel.897;novel.696	2
Cellular component	GO:0070390	transcription export complex 2	0.0155804	Zm00001eb329350;Zm00001eb329320	2	--	0	Zm00001eb329350;Zm00001eb329320	2
Cellular component	GO:0034399	nuclear periphery	0.0182725	Zm00001eb329350;Zm00001eb400520;Zm00001eb329320	3	Zm00001eb400520	1	Zm00001eb329350;Zm00001eb329320	2
Cellular component	GO:0048046	apoplast	0.0356423	Zm00001eb341630;Zm00001eb071650;novel.1323;Zm00001eb197310;Zm00001eb266940;Zm00001eb145860;Zm00001eb171580;Zm00001eb430420;Zm00001eb413190	9	Zm00001eb266940;Zm00001eb145860;Zm00001eb430420	3	Zm00001eb341630;Zm00001eb071650;novel.1323;Zm00001eb197310;Zm00001eb171580;Zm00001eb413190	6
Cellular component	GO:0035098	ESC/E(Z) complex	0.0391433	novel.897;novel.696	2	--	0	novel.897;novel.696	2
Cellular component	GO:0032586	protein storage vacuole membrane	0.0414799	Zm00001eb142200;Zm00001eb074660	2	Zm00001eb074660	1	Zm00001eb142200	1
Cellular component	GO:0000322	storage vacuole	0.0674544	Zm00001eb142200;Zm00001eb074660	2	Zm00001eb074660	1	Zm00001eb142200	1
Cellular component	GO:0000326	protein storage vacuole	0.0674544	Zm00001eb142200;Zm00001eb074660	2	Zm00001eb074660	1	Zm00001eb142200	1
Cellular component	GO:0005662	DNA replication factor A complex	0.0819884	Zm00001eb043290;Zm00001eb226220	2	Zm00001eb226220	1	Zm00001eb043290	1
Cellular component	GO:0009505	plant-type cell wall	0.0937275	novel.1262;Zm00001eb071650;Zm00001eb333290;Zm00001eb309050;Zm00001eb333000;Zm00001eb148420;Zm00001eb109910	7	novel.1262;Zm00001eb309050;Zm00001eb148420;Zm00001eb109910	4	Zm00001eb071650;Zm00001eb333290;Zm00001eb333000	3
Cellular component	GO:0005956	protein kinase CK2 complex	0.0967338	Zm00001eb390860	1	Zm00001eb390860	1	--	0
Cellular component	GO:0089701	U2AF complex	0.0967338	Zm00001eb343760	1	--	0	Zm00001eb343760	1
Cellular component	GO:0005618	cell wall	0.099655	novel.1262;Zm00001eb071650;Zm00001eb333290;Zm00001eb309050;Zm00001eb333000;Zm00001eb148420;Zm00001eb109910	7	novel.1262;Zm00001eb309050;Zm00001eb148420;Zm00001eb109910	4	Zm00001eb071650;Zm00001eb333290;Zm00001eb333000	3
Cellular component	GO:0030312	external encapsulating structure	0.118635	novel.1262;Zm00001eb071650;Zm00001eb333290;Zm00001eb309050;Zm00001eb333000;Zm00001eb148420;Zm00001eb109910	7	novel.1262;Zm00001eb309050;Zm00001eb148420;Zm00001eb109910	4	Zm00001eb071650;Zm00001eb333290;Zm00001eb333000	3
Cellular component	GO:0005774	vacuolar membrane	0.122078	Zm00001eb406090;Zm00001eb248980;Zm00001eb142200;Zm00001eb106010;Zm00001eb381570;Zm00001eb163460;Zm00001eb413480;Zm00001eb074660	8	Zm00001eb406090;Zm00001eb248980;Zm00001eb381570;Zm00001eb163460;Zm00001eb074660	5	Zm00001eb142200;Zm00001eb106010;Zm00001eb413480	3
Cellular component	GO:0042721	TIM22 mitochondrial import inner membrane insertion complex	0.132763	Zm00001eb308440	1	Zm00001eb308440	1	--	0
Cellular component	GO:0032578	aleurone grain membrane	0.150238	Zm00001eb155340	1	--	0	Zm00001eb155340	1
Cellular component	GO:0030015	CCR4-NOT core complex	0.151023	Zm00001eb065660;novel.451	2	--	0	Zm00001eb065660;novel.451	2
Cellular component	GO:0030894	replisome	0.151023	Zm00001eb043290;Zm00001eb226220	2	Zm00001eb226220	1	Zm00001eb043290	1
Cellular component	GO:0043601	nuclear replisome	0.151023	Zm00001eb043290;Zm00001eb226220	2	Zm00001eb226220	1	Zm00001eb043290	1
Cellular component	GO:0035097	histone methyltransferase complex	0.154548	novel.897;novel.696	2	--	0	novel.897;novel.696	2
Cellular component	GO:0099503	secretory vesicle	0.154854	Zm00001eb341630;Zm00001eb071650;Zm00001eb043080	3	--	0	Zm00001eb341630;Zm00001eb071650;Zm00001eb043080	3
Cellular component	GO:0043596	nuclear replication fork	0.158089	Zm00001eb043290;Zm00001eb226220	2	Zm00001eb226220	1	Zm00001eb043290	1
Cellular component	GO:0033095	aleurone grain	0.158843	Zm00001eb155340	1	--	0	Zm00001eb155340	1
Cellular component	GO:0009705	plant-type vacuole membrane	0.168572	Zm00001eb406090;Zm00001eb142200;Zm00001eb163460;Zm00001eb074660	4	Zm00001eb406090;Zm00001eb163460;Zm00001eb074660	3	Zm00001eb142200	1
Cellular component	GO:0000118	histone deacetylase complex	0.179627	novel.1337;Zm00001eb267730	2	novel.1337;Zm00001eb267730	2	--	0
Cellular component	GO:0032580	Golgi cisterna membrane	0.179627	Zm00001eb003630;Zm00001eb046610	2	Zm00001eb003630;Zm00001eb046610	2	--	0
Cellular component	GO:0032806	carboxy-terminal domain protein kinase complex	0.192403	Zm00001eb231420	1	--	0	Zm00001eb231420	1
Cellular component	GO:0030014	CCR4-NOT complex	0.194221	Zm00001eb065660;novel.451	2	--	0	Zm00001eb065660;novel.451	2
Cellular component	GO:0005615	extracellular space	0.196728	novel.1323;novel.858;novel.411;Zm00001eb247810	4	novel.858;novel.411;Zm00001eb247810	3	novel.1323	1
Cellular component	GO:0034708	methyltransferase complex	0.201575	novel.897;novel.696	2	--	0	novel.897;novel.696	2
Cellular component	GO:0098807	chloroplast thylakoid membrane protein complex	0.20868	Zm00001eb405610	1	Zm00001eb405610	1	--	0
Cellular component	GO:0033179	proton-transporting V-type ATPase, V0 domain	0.216695	Zm00001eb413480	1	--	0	Zm00001eb413480	1
Cellular component	GO:0016363	nuclear matrix	0.232483	Zm00001eb400520	1	Zm00001eb400520	1	--	0
Cellular component	GO:0035861	site of double-strand break	0.232483	Zm00001eb226220	1	Zm00001eb226220	1	--	0
Cellular component	GO:0090734	site of DNA damage	0.232483	Zm00001eb226220	1	Zm00001eb226220	1	--	0
Cellular component	GO:0000781	chromosome, telomeric region	0.255574	Zm00001eb226220	1	Zm00001eb226220	1	--	0
Cellular component	GO:0046930	pore complex	0.263116	Zm00001eb308440	1	Zm00001eb308440	1	--	0
Cellular component	GO:0000792	heterochromatin	0.270581	Zm00001eb113970	1	Zm00001eb113970	1	--	0
Cellular component	GO:0005657	replication fork	0.298645	Zm00001eb043290;Zm00001eb226220	2	Zm00001eb226220	1	Zm00001eb043290	1
Cellular component	GO:0009654	photosystem II oxygen evolving complex	0.306794	Zm00001eb273380	1	--	0	Zm00001eb273380	1
Cellular component	GO:0031234	extrinsic component of cytoplasmic side of plasma membrane	0.313819	Zm00001eb350150	1	--	0	Zm00001eb350150	1
Cellular component	GO:0033176	proton-transporting V-type ATPase complex	0.327656	Zm00001eb413480	1	--	0	Zm00001eb413480	1
Cellular component	GO:0043230	extracellular organelle	0.327656	novel.858	1	novel.858	1	--	0
Cellular component	GO:0065010	extracellular membrane-bounded organelle	0.327656	novel.858	1	novel.858	1	--	0
Cellular component	GO:0070062	extracellular exosome	0.327656	novel.858	1	novel.858	1	--	0
Cellular component	GO:1903561	extracellular vesicle	0.327656	novel.858	1	novel.858	1	--	0
Cellular component	GO:1902554	serine/threonine protein kinase complex	0.338182	Zm00001eb231420;Zm00001eb390860;Zm00001eb400550	3	Zm00001eb390860;Zm00001eb400550	2	Zm00001eb231420	1
Cellular component	GO:0098687	chromosomal region	0.372324	Zm00001eb113970;Zm00001eb226220	2	Zm00001eb113970;Zm00001eb226220	2	--	0
Cellular component	GO:0009523	photosystem II	0.38672	Zm00001eb273380;Zm00001eb324090	2	--	0	Zm00001eb273380;Zm00001eb324090	2
Cellular component	GO:1902911	protein kinase complex	0.395832	Zm00001eb231420;Zm00001eb390860;Zm00001eb400550	3	Zm00001eb390860;Zm00001eb400550	2	Zm00001eb231420	1
Cellular component	GO:0033177	proton-transporting two-sector ATPase complex, proton-transporting domain	0.405032	Zm00001eb413480	1	--	0	Zm00001eb413480	1
Cellular component	GO:0000932	P-body	0.408037	Zm00001eb065660;novel.451	2	--	0	Zm00001eb065660;novel.451	2
Cellular component	GO:0008023	transcription elongation factor complex	0.411065	Zm00001eb231420	1	--	0	Zm00001eb231420	1
Cellular component	GO:0019897	extrinsic component of plasma membrane	0.478871	Zm00001eb350150	1	--	0	Zm00001eb350150	1
Cellular component	GO:0036464	cytoplasmic ribonucleoprotein granule	0.492604	Zm00001eb065660;novel.451	2	--	0	Zm00001eb065660;novel.451	2
Cellular component	GO:0000145	exocyst	0.49457	novel.858	1	novel.858	1	--	0
Cellular component	GO:0009898	cytoplasmic side of plasma membrane	0.49457	Zm00001eb350150	1	--	0	Zm00001eb350150	1
Cellular component	GO:0035770	ribonucleoprotein granule	0.495828	Zm00001eb065660;novel.451	2	--	0	Zm00001eb065660;novel.451	2
Cellular component	GO:0000151	ubiquitin ligase complex	0.499846	novel.897;novel.696;Zm00001eb428330;Zm00001eb150860	4	Zm00001eb428330;Zm00001eb150860	2	novel.897;novel.696	2
Cellular component	GO:0009522	photosystem I	0.504774	Zm00001eb324090	1	--	0	Zm00001eb324090	1
Cellular component	GO:0000307	cyclin-dependent protein kinase holoenzyme complex	0.505421	Zm00001eb231420;Zm00001eb400550	2	Zm00001eb400550	1	Zm00001eb231420	1
Cellular component	GO:0005747	mitochondrial respiratory chain complex I	0.509798	Zm00001eb308440	1	Zm00001eb308440	1	--	0
Cellular component	GO:0030964	NADH dehydrogenase complex	0.509798	Zm00001eb308440	1	Zm00001eb308440	1	--	0
Cellular component	GO:0045271	respiratory chain complex I	0.509798	Zm00001eb308440	1	Zm00001eb308440	1	--	0
Cellular component	GO:0009521	photosystem	0.527341	Zm00001eb273380;Zm00001eb324090	2	--	0	Zm00001eb273380;Zm00001eb324090	2
Cellular component	GO:0005741	mitochondrial outer membrane	0.529393	Zm00001eb308440	1	Zm00001eb308440	1	--	0
Cellular component	GO:0000228	nuclear chromosome	0.574929	Zm00001eb043290;Zm00001eb226220	2	Zm00001eb226220	1	Zm00001eb043290	1
Cellular component	GO:0031985	Golgi cisterna	0.578168	Zm00001eb290310;Zm00001eb003630;Zm00001eb046610	3	Zm00001eb003630;Zm00001eb046610	2	Zm00001eb290310	1
Cellular component	GO:0010287	plastoglobule	0.583616	Zm00001eb324090	1	--	0	Zm00001eb324090	1
Cellular component	GO:0000138	Golgi trans cisterna	0.587844	Zm00001eb290310	1	--	0	Zm00001eb290310	1
Cellular component	GO:0098562	cytoplasmic side of membrane	0.587844	Zm00001eb350150	1	--	0	Zm00001eb350150	1
Cellular component	GO:1990204	oxidoreductase complex	0.591854	Zm00001eb273380;Zm00001eb308440	2	Zm00001eb308440	1	Zm00001eb273380	1
Cellular component	GO:0000775	chromosome, centromeric region	0.620157	Zm00001eb113970	1	Zm00001eb113970	1	--	0
Cellular component	GO:0005643	nuclear pore	0.620157	novel.296	1	novel.296	1	--	0
Cellular component	GO:0098552	side of membrane	0.627832	Zm00001eb350150	1	--	0	Zm00001eb350150	1
Cellular component	GO:0005795	Golgi stack	0.630853	Zm00001eb290310;Zm00001eb003630;Zm00001eb046610	3	Zm00001eb003630;Zm00001eb046610	2	Zm00001eb290310	1
Cellular component	GO:0005635	nuclear envelope	0.647118	novel.296;Zm00001eb400520	2	novel.296;Zm00001eb400520	2	--	0
Cellular component	GO:0032993	protein-DNA complex	0.649596	Zm00001eb043290;Zm00001eb226220	2	Zm00001eb226220	1	Zm00001eb043290	1
Cellular component	GO:0009707	chloroplast outer membrane	0.660505	Zm00001eb308440	1	Zm00001eb308440	1	--	0
Cellular component	GO:0009527	plastid outer membrane	0.683927	Zm00001eb308440	1	Zm00001eb308440	1	--	0
Cellular component	GO:0005746	mitochondrial respirasome	0.717521	Zm00001eb308440	1	Zm00001eb308440	1	--	0
Cellular component	GO:0090575	RNA polymerase II transcription regulator complex	0.717521	novel.733	1	--	0	novel.733	1
Cellular component	GO:0016469	proton-transporting two-sector ATPase complex	0.731592	Zm00001eb413480	1	--	0	Zm00001eb413480	1
Cellular component	GO:1902495	transmembrane transporter complex	0.750124	Zm00001eb308440	1	Zm00001eb308440	1	--	0
Cellular component	GO:0099023	vesicle tethering complex	0.752666	novel.858	1	novel.858	1	--	0
Cellular component	GO:1990351	transporter complex	0.767381	Zm00001eb308440	1	Zm00001eb308440	1	--	0
Cellular component	GO:0098803	respiratory chain complex	0.769748	Zm00001eb308440	1	Zm00001eb308440	1	--	0
Cellular component	GO:0005681	spliceosomal complex	0.779379	Zm00001eb343760;Zm00001eb029370	2	Zm00001eb029370	1	Zm00001eb343760	1
Cellular component	GO:0019898	extrinsic component of membrane	0.812346	Zm00001eb350150	1	--	0	Zm00001eb350150	1
Cellular component	GO:0010008	endosome membrane	0.815115	Zm00001eb343470;Zm00001eb290310	2	Zm00001eb343470	1	Zm00001eb290310	1
Cellular component	GO:0022625	cytosolic large ribosomal subunit	0.828858	Zm00001eb413490	1	--	0	Zm00001eb413490	1
Cellular component	GO:0031968	organelle outer membrane	0.837398	Zm00001eb308440	1	Zm00001eb308440	1	--	0
Cellular component	GO:0019867	outer membrane	0.840693	Zm00001eb308440	1	Zm00001eb308440	1	--	0
Cellular component	GO:0031969	chloroplast membrane	0.85495	Zm00001eb034810;Zm00001eb308440;Zm00001eb413200	3	Zm00001eb034810;Zm00001eb308440;Zm00001eb413200	3	--	0
Cellular component	GO:0009524	phragmoplast	0.859115	Zm00001eb019680	1	--	0	Zm00001eb019680	1
Cellular component	GO:0070469	respirasome	0.868864	Zm00001eb308440	1	Zm00001eb308440	1	--	0
Cellular component	GO:0061695	transferase complex, transferring phosphorus-containing groups	0.874529	Zm00001eb231420;Zm00001eb390860;Zm00001eb400550	3	Zm00001eb390860;Zm00001eb400550	2	Zm00001eb231420	1
Cellular component	GO:0022627	cytosolic small ribosomal subunit	0.879185	Zm00001eb273740	1	--	0	Zm00001eb273740	1
Cellular component	GO:0005667	transcription regulator complex	0.881636	novel.733	1	--	0	novel.733	1
Cellular component	GO:0015934	large ribosomal subunit	0.884038	Zm00001eb413490	1	--	0	Zm00001eb413490	1
Cellular component	GO:0098800	inner mitochondrial membrane protein complex	0.884038	Zm00001eb308440	1	Zm00001eb308440	1	--	0
Cellular component	GO:0031225	anchored component of membrane	0.887956	Zm00001eb434140;Zm00001eb155340	2	--	0	Zm00001eb434140;Zm00001eb155340	2
Cellular component	GO:0000785	chromatin	0.900862	Zm00001eb267730;Zm00001eb113970	2	Zm00001eb267730;Zm00001eb113970	2	--	0
Cellular component	GO:0005938	cell cortex	0.906503	novel.858	1	novel.858	1	--	0
Cellular component	GO:0046658	anchored component of plasma membrane	0.912982	Zm00001eb434140	1	--	0	Zm00001eb434140	1
Cellular component	GO:0022626	cytosolic ribosome	0.920672	Zm00001eb273740;Zm00001eb413490	2	--	0	Zm00001eb273740;Zm00001eb413490	2
Cellular component	GO:0015935	small ribosomal subunit	0.936048	Zm00001eb273740	1	--	0	Zm00001eb273740	1
Cellular component	GO:0098798	mitochondrial protein-containing complex	0.938622	Zm00001eb308440	1	Zm00001eb308440	1	--	0
Cellular component	GO:0044391	ribosomal subunit	0.956478	Zm00001eb273740;Zm00001eb413490	2	--	0	Zm00001eb273740;Zm00001eb413490	2
Cellular component	GO:0005777	peroxisome	0.977613	Zm00001eb396800	1	--	0	Zm00001eb396800	1
Cellular component	GO:0042579	microbody	0.977613	Zm00001eb396800	1	--	0	Zm00001eb396800	1
Cellular component	GO:0031226	intrinsic component of plasma membrane	0.979597	Zm00001eb434140	1	--	0	Zm00001eb434140	1
Cellular component	GO:0005802	trans-Golgi network	0.984558	Zm00001eb290310	1	--	0	Zm00001eb290310	1
Cellular component	GO:0005874	microtubule	0.986073	Zm00001eb413230	1	--	0	Zm00001eb413230	1
Cellular component	GO:0099513	polymeric cytoskeletal fiber	0.98691	Zm00001eb413230	1	--	0	Zm00001eb413230	1
Cellular component	GO:0099081	supramolecular polymer	0.987044	Zm00001eb413230	1	--	0	Zm00001eb413230	1
Cellular component	GO:0099512	supramolecular fiber	0.987044	Zm00001eb413230	1	--	0	Zm00001eb413230	1
Cellular component	GO:0005743	mitochondrial inner membrane	0.993521	Zm00001eb308440	1	Zm00001eb308440	1	--	0
Molecular function	GO:0004031	aldehyde oxidase activity	5.79559e-05	Zm00001eb396770;Zm00001eb396780;Zm00001eb396760;Zm00001eb396790	4	--	0	Zm00001eb396770;Zm00001eb396780;Zm00001eb396760;Zm00001eb396790	4
Molecular function	GO:0016623	oxidoreductase activity, acting on the aldehyde or oxo group of donors, oxygen as acceptor	5.79559e-05	Zm00001eb396770;Zm00001eb396780;Zm00001eb396760;Zm00001eb396790	4	--	0	Zm00001eb396770;Zm00001eb396780;Zm00001eb396760;Zm00001eb396790	4
Molecular function	GO:0016903	oxidoreductase activity, acting on the aldehyde or oxo group of donors	0.000917526	Zm00001eb316920;Zm00001eb374630;Zm00001eb396770;Zm00001eb396780;Zm00001eb396760;Zm00001eb396790;Zm00001eb208270	7	Zm00001eb316920;Zm00001eb374630;Zm00001eb208270	3	Zm00001eb396770;Zm00001eb396780;Zm00001eb396760;Zm00001eb396790	4
Molecular function	GO:0071949	FAD binding	0.00692194	Zm00001eb403180;Zm00001eb396770;Zm00001eb396780;Zm00001eb396760;Zm00001eb396790;Zm00001eb384900	6	Zm00001eb403180	1	Zm00001eb396770;Zm00001eb396780;Zm00001eb396760;Zm00001eb396790;Zm00001eb384900	5
Molecular function	GO:0022821	solute:potassium antiporter activity	0.00753659	Zm00001eb406090;Zm00001eb381570;Zm00001eb163460	3	Zm00001eb406090;Zm00001eb381570;Zm00001eb163460	3	--	0
Molecular function	GO:0010333	terpene synthase activity	0.00791136	Zm00001eb412980;Zm00001eb412960;Zm00001eb071090;Zm00001eb415070	4	Zm00001eb412980;Zm00001eb412960	2	Zm00001eb071090;Zm00001eb415070	2
Molecular function	GO:0016762	xyloglucan:xyloglucosyl transferase activity	0.00811769	Zm00001eb341630;Zm00001eb071650;Zm00001eb430420	3	Zm00001eb430420	1	Zm00001eb341630;Zm00001eb071650	2
Molecular function	GO:0030598	rRNA N-glycosylase activity	0.00850197	Zm00001eb326540;Zm00001eb096930	2	--	0	Zm00001eb326540;Zm00001eb096930	2
Molecular function	GO:0090729	toxin activity	0.00850197	Zm00001eb326540;Zm00001eb096930	2	--	0	Zm00001eb326540;Zm00001eb096930	2
Molecular function	GO:0030597	RNA glycosylase activity	0.00984821	Zm00001eb326540;Zm00001eb096930	2	--	0	Zm00001eb326540;Zm00001eb096930	2
Molecular function	GO:0004709	MAP kinase kinase kinase activity	0.010701	Zm00001eb360950;Zm00001eb155720;novel.2018	3	--	0	Zm00001eb360950;Zm00001eb155720;novel.2018	3
Molecular function	GO:0015079	potassium ion transmembrane transporter activity	0.010875	Zm00001eb406090;Zm00001eb361550;Zm00001eb381570;Zm00001eb163460;Zm00001eb274060	5	Zm00001eb406090;Zm00001eb361550;Zm00001eb381570;Zm00001eb163460;Zm00001eb274060	5	--	0
Molecular function	GO:1990841	promoter-specific chromatin binding	0.0128023	Zm00001eb234120;Zm00001eb206730	2	--	0	Zm00001eb234120;Zm00001eb206730	2
Molecular function	GO:0016838	carbon-oxygen lyase activity, acting on phosphates	0.0128846	Zm00001eb412980;Zm00001eb412960;Zm00001eb071090;Zm00001eb415070	4	Zm00001eb412980;Zm00001eb412960	2	Zm00001eb071090;Zm00001eb415070	2
Molecular function	GO:0004601	peroxidase activity	0.0133123	Zm00001eb330530;Zm00001eb333290;Zm00001eb111420;Zm00001eb226370;Zm00001eb333000;Zm00001eb109910;Zm00001eb348950	7	Zm00001eb226370;Zm00001eb109910	2	Zm00001eb330530;Zm00001eb333290;Zm00001eb111420;Zm00001eb333000;Zm00001eb348950	5
Molecular function	GO:0051537	2 iron, 2 sulfur cluster binding	0.0140107	Zm00001eb396770;Zm00001eb396780;Zm00001eb360150;Zm00001eb396760;Zm00001eb396790	5	--	0	Zm00001eb396770;Zm00001eb396780;Zm00001eb360150;Zm00001eb396760;Zm00001eb396790	5
Molecular function	GO:0016684	oxidoreductase activity, acting on peroxide as acceptor	0.0161148	Zm00001eb330530;Zm00001eb333290;Zm00001eb111420;Zm00001eb226370;Zm00001eb333000;Zm00001eb109910;Zm00001eb348950	7	Zm00001eb226370;Zm00001eb109910	2	Zm00001eb330530;Zm00001eb333290;Zm00001eb111420;Zm00001eb333000;Zm00001eb348950	5
Molecular function	GO:0045549	9-cis-epoxycarotenoid dioxygenase activity	0.0197004	Zm00001eb300240;Zm00001eb218680	2	Zm00001eb218680	1	Zm00001eb300240	1
Molecular function	GO:0010436	carotenoid dioxygenase activity	0.0216198	Zm00001eb300240;Zm00001eb218680	2	Zm00001eb218680	1	Zm00001eb300240	1
Molecular function	GO:0140828	metal cation:monoatomic cation antiporter activity	0.024224	Zm00001eb406090;Zm00001eb381570;Zm00001eb163460	3	Zm00001eb406090;Zm00001eb381570;Zm00001eb163460	3	--	0
Molecular function	GO:0003964	RNA-directed DNA polymerase activity	0.0302935	novel.1995;novel.1612;novel.67;novel.666;novel.1374	5	novel.1995	1	novel.1612;novel.67;novel.666;novel.1374	4
Molecular function	GO:0004520	endodeoxyribonuclease activity	0.0322932	Zm00001eb171920;Zm00001eb125480	2	Zm00001eb171920;Zm00001eb125480	2	--	0
Molecular function	GO:0004529	exodeoxyribonuclease activity	0.0322932	Zm00001eb171920;Zm00001eb125480	2	Zm00001eb171920;Zm00001eb125480	2	--	0
Molecular function	GO:0016895	exodeoxyribonuclease activity, producing 5'-phosphomonoesters	0.0322932	Zm00001eb171920;Zm00001eb125480	2	Zm00001eb171920;Zm00001eb125480	2	--	0
Molecular function	GO:0016209	antioxidant activity	0.0371124	Zm00001eb330530;Zm00001eb333290;Zm00001eb111420;Zm00001eb226370;Zm00001eb333000;Zm00001eb109910;Zm00001eb348950	7	Zm00001eb226370;Zm00001eb109910	2	Zm00001eb330530;Zm00001eb333290;Zm00001eb111420;Zm00001eb333000;Zm00001eb348950	5
Molecular function	GO:0016799	hydrolase activity, hydrolyzing N-glycosyl compounds	0.0409258	Zm00001eb160700;Zm00001eb326540;Zm00001eb096930	3	--	0	Zm00001eb160700;Zm00001eb326540;Zm00001eb096930	3
Molecular function	GO:0008061	chitin binding	0.042019	Zm00001eb047940;Zm00001eb272090	2	Zm00001eb272090	1	Zm00001eb047940	1
Molecular function	GO:0030170	pyridoxal phosphate binding	0.0420466	Zm00001eb109370;Zm00001eb073290;Zm00001eb416690;Zm00001eb203230;Zm00001eb055950	5	Zm00001eb109370;Zm00001eb416690;Zm00001eb203230	3	Zm00001eb073290;Zm00001eb055950	2
Molecular function	GO:0070279	vitamin B6 binding	0.0420466	Zm00001eb109370;Zm00001eb073290;Zm00001eb416690;Zm00001eb203230;Zm00001eb055950	5	Zm00001eb109370;Zm00001eb416690;Zm00001eb203230	3	Zm00001eb073290;Zm00001eb055950	2
Molecular function	GO:0008171	O-methyltransferase activity	0.0469757	Zm00001eb292890;Zm00001eb371810;Zm00001eb292840	3	Zm00001eb292890	1	Zm00001eb371810;Zm00001eb292840	2
Molecular function	GO:0016621	cinnamoyl-CoA reductase activity	0.0472411	Zm00001eb316920;Zm00001eb374630	2	Zm00001eb316920;Zm00001eb374630	2	--	0
Molecular function	GO:0016846	carbon-sulfur lyase activity	0.0472411	Zm00001eb413220;Zm00001eb055950	2	--	0	Zm00001eb413220;Zm00001eb055950	2
Molecular function	GO:0016796	exonuclease activity, active with either ribo- or deoxyribonucleic acids and producing 5'-phosphomonoesters	0.0491079	Zm00001eb065660;novel.451;Zm00001eb171920;Zm00001eb125480	4	Zm00001eb171920;Zm00001eb125480	2	Zm00001eb065660;novel.451	2
Molecular function	GO:0015298	solute:cation antiporter activity	0.0517855	Zm00001eb406090;Zm00001eb381570;Zm00001eb163460	3	Zm00001eb406090;Zm00001eb381570;Zm00001eb163460	3	--	0
Molecular function	GO:0051753	mannan synthase activity	0.0526859	Zm00001eb323760;Zm00001eb279750	2	Zm00001eb323760	1	Zm00001eb279750	1
Molecular function	GO:0019187	beta-1,4-mannosyltransferase activity	0.0583414	Zm00001eb323760;Zm00001eb279750	2	Zm00001eb323760	1	Zm00001eb279750	1
Molecular function	GO:0043531	ADP binding	0.0593346	Zm00001eb381850;Zm00001eb245520;Zm00001eb077540;Zm00001eb080230;Zm00001eb298830	5	Zm00001eb381850;Zm00001eb298830	2	Zm00001eb245520;Zm00001eb077540;Zm00001eb080230	3
Molecular function	GO:0042803	protein homodimerization activity	0.0622112	Zm00001eb415520;Zm00001eb212120;Zm00001eb350150;Zm00001eb420440;novel.913;Zm00001eb308440;Zm00001eb208270;Zm00001eb332640	8	novel.913;Zm00001eb308440;Zm00001eb208270	3	Zm00001eb415520;Zm00001eb212120;Zm00001eb350150;Zm00001eb420440;Zm00001eb332640	5
Molecular function	GO:0005244	voltage-gated ion channel activity	0.0638876	Zm00001eb119430;Zm00001eb361550;Zm00001eb297200	3	Zm00001eb119430;Zm00001eb361550	2	Zm00001eb297200	1
Molecular function	GO:0022832	voltage-gated channel activity	0.0638876	Zm00001eb119430;Zm00001eb361550;Zm00001eb297200	3	Zm00001eb119430;Zm00001eb361550	2	Zm00001eb297200	1
Molecular function	GO:0015267	channel activity	0.0641558	Zm00001eb119430;Zm00001eb372380;Zm00001eb361550;Zm00001eb297200;Zm00001eb308440;Zm00001eb074660;novel.2063	7	Zm00001eb119430;Zm00001eb361550;Zm00001eb308440;Zm00001eb074660	4	Zm00001eb372380;Zm00001eb297200;novel.2063	3
Molecular function	GO:0022803	passive transmembrane transporter activity	0.0641558	Zm00001eb119430;Zm00001eb372380;Zm00001eb361550;Zm00001eb297200;Zm00001eb308440;Zm00001eb074660;novel.2063	7	Zm00001eb119430;Zm00001eb361550;Zm00001eb308440;Zm00001eb074660	4	Zm00001eb372380;Zm00001eb297200;novel.2063	3
Molecular function	GO:0034061	DNA polymerase activity	0.0716234	novel.1995;novel.1612;novel.67;novel.666;novel.1374	5	novel.1995	1	novel.1612;novel.67;novel.666;novel.1374	4
Molecular function	GO:0019842	vitamin binding	0.072566	Zm00001eb109370;Zm00001eb073290;Zm00001eb137930;Zm00001eb416690;Zm00001eb203230;Zm00001eb055950	6	Zm00001eb109370;Zm00001eb137930;Zm00001eb416690;Zm00001eb203230	4	Zm00001eb073290;Zm00001eb055950	2
Molecular function	GO:0005372	water transmembrane transporter activity	0.073327	Zm00001eb074660;novel.2063	2	Zm00001eb074660	1	novel.2063	1
Molecular function	GO:0015250	water channel activity	0.073327	Zm00001eb074660;novel.2063	2	Zm00001eb074660	1	novel.2063	1
Molecular function	GO:0008970	phospholipase A1 activity	0.0764583	Zm00001eb249230;Zm00001eb266650	2	Zm00001eb266650	1	Zm00001eb249230	1
Molecular function	GO:0072341	modified amino acid binding	0.0764583	Zm00001eb285360;novel.913	2	Zm00001eb285360;novel.913	2	--	0
Molecular function	GO:0140102	catalytic activity, acting on a rRNA	0.0796312	Zm00001eb326540;Zm00001eb096930	2	--	0	Zm00001eb326540;Zm00001eb096930	2
Molecular function	GO:0008308	voltage-gated anion channel activity	0.086097	Zm00001eb119430;Zm00001eb297200	2	Zm00001eb119430	1	Zm00001eb297200	1
Molecular function	GO:0030247	polysaccharide binding	0.0863513	Zm00001eb341630;Zm00001eb071650;Zm00001eb350600;Zm00001eb430420	4	Zm00001eb350600;Zm00001eb430420	2	Zm00001eb341630;Zm00001eb071650	2
Molecular function	GO:0008483	transaminase activity	0.0873288	Zm00001eb109370;Zm00001eb073290;Zm00001eb203230	3	Zm00001eb109370;Zm00001eb203230	2	Zm00001eb073290	1
Molecular function	GO:0016769	transferase activity, transferring nitrogenous groups	0.0873288	Zm00001eb109370;Zm00001eb073290;Zm00001eb203230	3	Zm00001eb109370;Zm00001eb203230	2	Zm00001eb073290	1
Molecular function	GO:0004568	chitinase activity	0.0893875	Zm00001eb047940;Zm00001eb272090	2	Zm00001eb272090	1	Zm00001eb047940	1
Molecular function	GO:0004497	monooxygenase activity	0.0904787	Zm00001eb251960;Zm00001eb403180;Zm00001eb196960;Zm00001eb058070;Zm00001eb135830;Zm00001eb058060;Zm00001eb312250;Zm00001eb110050;Zm00001eb118430	9	Zm00001eb403180;Zm00001eb058070;Zm00001eb135830;Zm00001eb058060;Zm00001eb312250;Zm00001eb118430	6	Zm00001eb251960;Zm00001eb196960;Zm00001eb110050	3
Molecular function	GO:0016620	oxidoreductase activity, acting on the aldehyde or oxo group of donors, NAD or NADP as acceptor	0.0980231	Zm00001eb316920;Zm00001eb374630;Zm00001eb208270	3	Zm00001eb316920;Zm00001eb374630;Zm00001eb208270	3	--	0
Molecular function	GO:0030145	manganese ion binding	0.0980231	Zm00001eb171580;Zm00001eb171920;Zm00001eb413190	3	Zm00001eb171920	1	Zm00001eb171580;Zm00001eb413190	2
Molecular function	GO:0004535	poly(A)-specific ribonuclease activity	0.0994743	Zm00001eb065660;novel.451	2	--	0	Zm00001eb065660;novel.451	2
Molecular function	GO:0004536	deoxyribonuclease activity	0.102905	Zm00001eb171920;Zm00001eb125480	2	Zm00001eb171920;Zm00001eb125480	2	--	0
Molecular function	GO:0016759	cellulose synthase activity	0.102905	Zm00001eb323760;Zm00001eb040830	2	Zm00001eb323760	1	Zm00001eb040830	1
Molecular function	GO:0016760	cellulose synthase (UDP-forming) activity	0.102905	Zm00001eb323760;Zm00001eb040830	2	Zm00001eb323760	1	Zm00001eb040830	1
Molecular function	GO:0004838	L-tyrosine:2-oxoglutarate aminotransferase activity	0.103649	Zm00001eb203230	1	Zm00001eb203230	1	--	0
Molecular function	GO:0047517	1,4-beta-D-xylan synthase activity	0.103649	Zm00001eb341770	1	--	0	Zm00001eb341770	1
Molecular function	GO:0070547	L-tyrosine aminotransferase activity	0.103649	Zm00001eb203230	1	Zm00001eb203230	1	--	0
Molecular function	GO:0051536	iron-sulfur cluster binding	0.105486	Zm00001eb396770;Zm00001eb396780;Zm00001eb360150;Zm00001eb396760;Zm00001eb264060;Zm00001eb396790	6	Zm00001eb264060	1	Zm00001eb396770;Zm00001eb396780;Zm00001eb360150;Zm00001eb396760;Zm00001eb396790	5
Molecular function	GO:0051540	metal cluster binding	0.105486	Zm00001eb396770;Zm00001eb396780;Zm00001eb360150;Zm00001eb396760;Zm00001eb264060;Zm00001eb396790	6	Zm00001eb264060	1	Zm00001eb396770;Zm00001eb396780;Zm00001eb360150;Zm00001eb396760;Zm00001eb396790	5
Molecular function	GO:0019887	protein kinase regulator activity	0.113355	Zm00001eb231420;Zm00001eb390860;Zm00001eb009250;Zm00001eb400550	4	Zm00001eb390860;Zm00001eb400550	2	Zm00001eb231420;Zm00001eb009250	2
Molecular function	GO:0005253	anion channel activity	0.113384	Zm00001eb119430;Zm00001eb297200	2	Zm00001eb119430	1	Zm00001eb297200	1
Molecular function	GO:0047037	salutaridine reductase (NADPH) activity	0.113405	Zm00001eb248540	1	Zm00001eb248540	1	--	0
Molecular function	GO:0050660	flavin adenine dinucleotide binding	0.119705	Zm00001eb403180;Zm00001eb396770;Zm00001eb396780;Zm00001eb396760;Zm00001eb396790;Zm00001eb384900	6	Zm00001eb403180	1	Zm00001eb396770;Zm00001eb396780;Zm00001eb396760;Zm00001eb396790;Zm00001eb384900	5
Molecular function	GO:0004527	exonuclease activity	0.120627	Zm00001eb065660;novel.451;Zm00001eb171920;Zm00001eb125480	4	Zm00001eb171920;Zm00001eb125480	2	Zm00001eb065660;novel.451	2
Molecular function	GO:0004324	ferredoxin-NADP+ reductase activity	0.123056	Zm00001eb405610	1	Zm00001eb405610	1	--	0
Molecular function	GO:0008937	ferredoxin-NAD(P) reductase activity	0.123056	Zm00001eb405610	1	Zm00001eb405610	1	--	0
Molecular function	GO:0016151	nickel cation binding	0.123056	Zm00001eb413220	1	--	0	Zm00001eb413220	1
Molecular function	GO:0030628	pre-mRNA 3'-splice site binding	0.123056	Zm00001eb343760	1	--	0	Zm00001eb343760	1
Molecular function	GO:0045551	cinnamyl-alcohol dehydrogenase activity	0.123056	Zm00001eb088800	1	--	0	Zm00001eb088800	1
Molecular function	GO:0047372	acylglycerol lipase activity	0.123056	Zm00001eb166850	1	--	0	Zm00001eb166850	1
Molecular function	GO:0052747	sinapyl alcohol dehydrogenase activity	0.123056	Zm00001eb088800	1	--	0	Zm00001eb088800	1
Molecular function	GO:0000030	mannosyltransferase activity	0.124123	Zm00001eb323760;Zm00001eb279750	2	Zm00001eb323760	1	Zm00001eb279750	1
Molecular function	GO:0019209	kinase activator activity	0.131413	Zm00001eb231420;Zm00001eb009250	2	--	0	Zm00001eb231420;Zm00001eb009250	2
Molecular function	GO:0030295	protein kinase activator activity	0.131413	Zm00001eb231420;Zm00001eb009250	2	--	0	Zm00001eb231420;Zm00001eb009250	2
Molecular function	GO:0019207	kinase regulator activity	0.131901	Zm00001eb231420;Zm00001eb390860;Zm00001eb009250;Zm00001eb400550	4	Zm00001eb390860;Zm00001eb400550	2	Zm00001eb231420;Zm00001eb009250	2
Molecular function	GO:0102682	N6-(Delta2-isopentenyl)-adenosine 5'-monophosphate phosphoribohydrolase activity	0.132603	Zm00001eb160700	1	--	0	Zm00001eb160700	1
Molecular function	GO:0004021	L-alanine:2-oxoglutarate aminotransferase activity	0.142045	Zm00001eb109370	1	Zm00001eb109370	1	--	0
Molecular function	GO:0005544	calcium-dependent phospholipid binding	0.142045	Zm00001eb148310	1	--	0	Zm00001eb148310	1
Molecular function	GO:0047635	alanine-oxo-acid transaminase activity	0.142045	Zm00001eb109370	1	Zm00001eb109370	1	--	0
Molecular function	GO:0004190	aspartic-type endopeptidase activity	0.143075	novel.1612;novel.67;novel.666;Zm00001eb309050;Zm00001eb136650	5	Zm00001eb309050	1	novel.1612;novel.67;novel.666;Zm00001eb136650	4
Molecular function	GO:0070001	aspartic-type peptidase activity	0.143075	novel.1612;novel.67;novel.666;Zm00001eb309050;Zm00001eb136650	5	Zm00001eb309050	1	novel.1612;novel.67;novel.666;Zm00001eb136650	4
Molecular function	GO:0046527	glucosyltransferase activity	0.144897	Zm00001eb341630;Zm00001eb071650;Zm00001eb323760;Zm00001eb040830;novel.484;Zm00001eb430420	6	Zm00001eb323760;Zm00001eb430420	2	Zm00001eb341630;Zm00001eb071650;Zm00001eb040830;novel.484	4
Molecular function	GO:0061630	ubiquitin protein ligase activity	0.146527	Zm00001eb418460;Zm00001eb243190;Zm00001eb187340;Zm00001eb187290;Zm00001eb243070;Zm00001eb010210;Zm00001eb065620	7	--	0	Zm00001eb418460;Zm00001eb243190;Zm00001eb187340;Zm00001eb187290;Zm00001eb243070;Zm00001eb010210;Zm00001eb065620	7
Molecular function	GO:0080030	methyl indole-3-acetate esterase activity	0.15004	novel.1881;Zm00001eb349490	2	--	0	novel.1881;Zm00001eb349490	2
Molecular function	GO:0008296	3'-5'-exodeoxyribonuclease activity	0.151385	Zm00001eb171920	1	Zm00001eb171920	1	--	0
Molecular function	GO:0008373	sialyltransferase activity	0.151385	Zm00001eb077930	1	--	0	Zm00001eb077930	1
Molecular function	GO:0016731	oxidoreductase activity, acting on iron-sulfur proteins as donors, NAD or NADP as acceptor	0.151385	Zm00001eb405610	1	Zm00001eb405610	1	--	0
Molecular function	GO:0035252	UDP-xylosyltransferase activity	0.151385	Zm00001eb125890	1	Zm00001eb125890	1	--	0
Molecular function	GO:0047259	glucomannan 4-beta-mannosyltransferase activity	0.151385	Zm00001eb279750	1	--	0	Zm00001eb279750	1
Molecular function	GO:0061659	ubiquitin-like protein ligase activity	0.153194	Zm00001eb418460;Zm00001eb243190;Zm00001eb187340;Zm00001eb187290;Zm00001eb243070;Zm00001eb010210;Zm00001eb065620	7	--	0	Zm00001eb418460;Zm00001eb243190;Zm00001eb187340;Zm00001eb187290;Zm00001eb243070;Zm00001eb010210;Zm00001eb065620	7
Molecular function	GO:0016298	lipase activity	0.153631	Zm00001eb249230;Zm00001eb228370;Zm00001eb166850;Zm00001eb266650	4	Zm00001eb266650	1	Zm00001eb249230;Zm00001eb228370;Zm00001eb166850	3
Molecular function	GO:0004000	adenosine deaminase activity	0.160624	Zm00001eb032010	1	--	0	Zm00001eb032010	1
Molecular function	GO:0005354	galactose transmembrane transporter activity	0.160624	Zm00001eb166250	1	Zm00001eb166250	1	--	0
Molecular function	GO:0008251	tRNA-specific adenosine deaminase activity	0.160624	Zm00001eb032010	1	--	0	Zm00001eb032010	1
Molecular function	GO:0015148	D-xylose transmembrane transporter activity	0.160624	Zm00001eb166250	1	Zm00001eb166250	1	--	0
Molecular function	GO:0015168	glycerol transmembrane transporter activity	0.160624	Zm00001eb166250	1	Zm00001eb166250	1	--	0
Molecular function	GO:0015575	mannitol transmembrane transporter activity	0.160624	Zm00001eb166250	1	Zm00001eb166250	1	--	0
Molecular function	GO:0015576	sorbitol transmembrane transporter activity	0.160624	Zm00001eb166250	1	Zm00001eb166250	1	--	0
Molecular function	GO:0015591	D-ribose transmembrane transporter activity	0.160624	Zm00001eb166250	1	Zm00001eb166250	1	--	0
Molecular function	GO:0018685	alkane 1-monooxygenase activity	0.160624	Zm00001eb196960	1	--	0	Zm00001eb196960	1
Molecular function	GO:0047714	galactolipase activity	0.160624	Zm00001eb249230	1	--	0	Zm00001eb249230	1
Molecular function	GO:0061575	cyclin-dependent protein serine/threonine kinase activator activity	0.160624	Zm00001eb231420	1	--	0	Zm00001eb231420	1
Molecular function	GO:0080046	quercetin 4'-O-glucosyltransferase activity	0.160624	novel.484	1	--	0	novel.484	1
Molecular function	GO:1990380	Lys48-specific deubiquitinase activity	0.160624	Zm00001eb357270	1	Zm00001eb357270	1	--	0
Molecular function	GO:0008408	3'-5' exonuclease activity	0.163578	Zm00001eb065660;novel.451;Zm00001eb171920	3	Zm00001eb171920	1	Zm00001eb065660;novel.451	2
Molecular function	GO:0004620	phospholipase activity	0.166218	Zm00001eb249230;Zm00001eb166850;Zm00001eb266650	3	Zm00001eb266650	1	Zm00001eb249230;Zm00001eb166850	2
Molecular function	GO:0022836	gated channel activity	0.166218	Zm00001eb119430;Zm00001eb361550;Zm00001eb297200	3	Zm00001eb119430;Zm00001eb361550	2	Zm00001eb297200	1
Molecular function	GO:0016702	oxidoreductase activity, acting on single donors with incorporation of molecular oxygen, incorporation of two atoms of oxygen	0.16915	Zm00001eb300240;Zm00001eb218680	2	Zm00001eb218680	1	Zm00001eb300240	1
Molecular function	GO:0015146	pentose transmembrane transporter activity	0.169763	Zm00001eb166250	1	Zm00001eb166250	1	--	0
Molecular function	GO:0015385	sodium:proton antiporter activity	0.169763	Zm00001eb381570	1	Zm00001eb381570	1	--	0
Molecular function	GO:0045543	gibberellin 2-beta-dioxygenase activity	0.169763	Zm00001eb283860	1	--	0	Zm00001eb283860	1
Molecular function	GO:0052634	C-19 gibberellin 2-beta-dioxygenase activity	0.169763	Zm00001eb283860	1	--	0	Zm00001eb283860	1
Molecular function	GO:0009924	octadecanal decarbonylase activity	0.187744	Zm00001eb135830	1	Zm00001eb135830	1	--	0
Molecular function	GO:0015081	sodium ion transmembrane transporter activity	0.187744	Zm00001eb381570	1	Zm00001eb381570	1	--	0
Molecular function	GO:0071771	aldehyde decarbonylase activity	0.187744	Zm00001eb135830	1	Zm00001eb135830	1	--	0
Molecular function	GO:1990465	aldehyde oxygenase (deformylating) activity	0.187744	Zm00001eb135830	1	Zm00001eb135830	1	--	0
Molecular function	GO:0016763	pentosyltransferase activity	0.187768	Zm00001eb341770;Zm00001eb270290;Zm00001eb125890	3	Zm00001eb125890	1	Zm00001eb341770;Zm00001eb270290	2
Molecular function	GO:0004869	cysteine-type endopeptidase inhibitor activity	0.196588	Zm00001eb203420	1	Zm00001eb203420	1	--	0
Molecular function	GO:0052636	arabinosyltransferase activity	0.196588	Zm00001eb270290	1	--	0	Zm00001eb270290	1
Molecular function	GO:0015297	antiporter activity	0.198365	Zm00001eb406090;Zm00001eb106010;Zm00001eb343090;Zm00001eb381570;Zm00001eb163460	5	Zm00001eb406090;Zm00001eb381570;Zm00001eb163460	3	Zm00001eb106010;Zm00001eb343090	2
Molecular function	GO:0051213	dioxygenase activity	0.202891	Zm00001eb300240;Zm00001eb283860;Zm00001eb137930;Zm00001eb218680	4	Zm00001eb137930;Zm00001eb218680	2	Zm00001eb300240;Zm00001eb283860	2
Molecular function	GO:0019901	protein kinase binding	0.204378	Zm00001eb360950;Zm00001eb155720;novel.2018	3	--	0	Zm00001eb360950;Zm00001eb155720;novel.2018	3
Molecular function	GO:0000285	1-phosphatidylinositol-3-phosphate 5-kinase activity	0.205337	Zm00001eb343470	1	Zm00001eb343470	1	--	0
Molecular function	GO:0043539	protein serine/threonine kinase activator activity	0.205337	Zm00001eb231420	1	--	0	Zm00001eb231420	1
Molecular function	GO:0008757	S-adenosylmethionine-dependent methyltransferase activity	0.207905	Zm00001eb292890;Zm00001eb267640;Zm00001eb371810;Zm00001eb371800;Zm00001eb292840	5	Zm00001eb292890	1	Zm00001eb267640;Zm00001eb371810;Zm00001eb371800;Zm00001eb292840	4
Molecular function	GO:0003968	RNA-directed 5'-3' RNA polymerase activity	0.208416	novel.1995;novel.1374	2	novel.1995	1	novel.1374	1
Molecular function	GO:0005365	myo-inositol transmembrane transporter activity	0.21399	Zm00001eb166250	1	Zm00001eb166250	1	--	0
Molecular function	GO:0015166	polyol transmembrane transporter activity	0.21399	Zm00001eb166250	1	Zm00001eb166250	1	--	0
Molecular function	GO:0016730	oxidoreductase activity, acting on iron-sulfur proteins as donors	0.21399	Zm00001eb405610	1	Zm00001eb405610	1	--	0
Molecular function	GO:0031420	alkali metal ion binding	0.21399	Zm00001eb208270	1	Zm00001eb208270	1	--	0
Molecular function	GO:0035250	UDP-galactosyltransferase activity	0.22255	Zm00001eb034810	1	Zm00001eb034810	1	--	0
Molecular function	GO:0070300	phosphatidic acid binding	0.22255	Zm00001eb285360	1	Zm00001eb285360	1	--	0
Molecular function	GO:0005355	glucose transmembrane transporter activity	0.231016	Zm00001eb166250	1	Zm00001eb166250	1	--	0
Molecular function	GO:0019239	deaminase activity	0.231016	Zm00001eb032010	1	--	0	Zm00001eb032010	1
Molecular function	GO:0036002	pre-mRNA binding	0.231016	Zm00001eb343760	1	--	0	Zm00001eb343760	1
Molecular function	GO:0004806	triglyceride lipase activity	0.239391	Zm00001eb249230	1	--	0	Zm00001eb249230	1
Molecular function	GO:0016701	oxidoreductase activity, acting on single donors with incorporation of molecular oxygen	0.240441	Zm00001eb300240;Zm00001eb218680	2	Zm00001eb218680	1	Zm00001eb300240	1
Molecular function	GO:0010242	oxygen evolving activity	0.247675	Zm00001eb273380	1	--	0	Zm00001eb273380	1
Molecular function	GO:0016713	oxidoreductase activity, acting on paired donors, with incorporation or reduction of molecular oxygen, reduced iron-sulfur protein as one donor, and incorporation of one atom of oxygen	0.247675	Zm00001eb196960	1	--	0	Zm00001eb196960	1
Molecular function	GO:0022853	active ion transmembrane transporter activity	0.248737	Zm00001eb406090;Zm00001eb248980;Zm00001eb381570;Zm00001eb163460;Zm00001eb413480;Zm00001eb166250	6	Zm00001eb406090;Zm00001eb248980;Zm00001eb381570;Zm00001eb163460;Zm00001eb166250	5	Zm00001eb413480	1
Molecular function	GO:0000977	RNA polymerase II transcription regulatory region sequence-specific DNA binding	0.253542	novel.733;Zm00001eb234690;Zm00001eb214440;Zm00001eb423130;Zm00001eb428800	5	Zm00001eb428800	1	novel.733;Zm00001eb234690;Zm00001eb214440;Zm00001eb423130	4
Molecular function	GO:0004708	MAP kinase kinase activity	0.255869	Zm00001eb009250	1	--	0	Zm00001eb009250	1
Molecular function	GO:0015386	potassium:proton antiporter activity	0.255869	Zm00001eb381570	1	Zm00001eb381570	1	--	0
Molecular function	GO:0043546	molybdopterin cofactor binding	0.255869	Zm00001eb396770	1	--	0	Zm00001eb396770	1
Molecular function	GO:0052689	carboxylic ester hydrolase activity	0.263784	Zm00001eb249230;novel.1881;Zm00001eb166850;Zm00001eb349490;Zm00001eb266650	5	Zm00001eb266650	1	Zm00001eb249230;novel.1881;Zm00001eb166850;Zm00001eb349490	4
Molecular function	GO:0015149	hexose transmembrane transporter activity	0.263974	Zm00001eb166250	1	Zm00001eb166250	1	--	0
Molecular function	GO:0016229	steroid dehydrogenase activity	0.263974	Zm00001eb300570	1	Zm00001eb300570	1	--	0
Molecular function	GO:0043295	glutathione binding	0.263974	novel.913	1	novel.913	1	--	0
Molecular function	GO:1900750	oligopeptide binding	0.263974	novel.913	1	novel.913	1	--	0
Molecular function	GO:0004445	inositol-polyphosphate 5-phosphatase activity	0.271991	Zm00001eb311920	1	--	0	Zm00001eb311920	1
Molecular function	GO:0034485	phosphatidylinositol-3,4,5-trisphosphate 5-phosphatase activity	0.271991	Zm00001eb311920	1	--	0	Zm00001eb311920	1
Molecular function	GO:0035064	methylated histone binding	0.271991	Zm00001eb113970	1	Zm00001eb113970	1	--	0
Molecular function	GO:0140034	methylation-dependent protein binding	0.271991	Zm00001eb113970	1	Zm00001eb113970	1	--	0
Molecular function	GO:0000175	3'-5'-exoribonuclease activity	0.272675	Zm00001eb065660;novel.451	2	--	0	Zm00001eb065660;novel.451	2
Molecular function	GO:0004029	aldehyde dehydrogenase (NAD+) activity	0.279921	Zm00001eb208270	1	Zm00001eb208270	1	--	0
Molecular function	GO:0004030	aldehyde dehydrogenase [NAD(P)+] activity	0.279921	Zm00001eb208270	1	Zm00001eb208270	1	--	0
Molecular function	GO:0005504	fatty acid binding	0.279921	Zm00001eb364930	1	Zm00001eb364930	1	--	0
Molecular function	GO:0016208	AMP binding	0.279921	Zm00001eb096930	1	--	0	Zm00001eb096930	1
Molecular function	GO:0034594	phosphatidylinositol trisphosphate phosphatase activity	0.279921	Zm00001eb311920	1	--	0	Zm00001eb311920	1
Molecular function	GO:0102483	scopolin beta-glucosidase activity	0.279921	Zm00001eb418490	1	Zm00001eb418490	1	--	0
Molecular function	GO:0004519	endonuclease activity	0.28454	novel.1612;novel.67;novel.666;Zm00001eb171920;Zm00001eb125480	5	Zm00001eb171920;Zm00001eb125480	2	novel.1612;novel.67;novel.666	3
Molecular function	GO:0046030	inositol trisphosphate phosphatase activity	0.287765	Zm00001eb311920	1	--	0	Zm00001eb311920	1
Molecular function	GO:0042910	xenobiotic transmembrane transporter activity	0.292811	Zm00001eb106010;Zm00001eb343090	2	--	0	Zm00001eb106010;Zm00001eb343090	2
Molecular function	GO:0004532	exoribonuclease activity	0.296831	Zm00001eb065660;novel.451	2	--	0	Zm00001eb065660;novel.451	2
Molecular function	GO:0016538	cyclin-dependent protein serine/threonine kinase regulator activity	0.296831	Zm00001eb231420;Zm00001eb400550	2	Zm00001eb400550	1	Zm00001eb231420	1
Molecular function	GO:0016896	exoribonuclease activity, producing 5'-phosphomonoesters	0.296831	Zm00001eb065660;novel.451	2	--	0	Zm00001eb065660;novel.451	2
Molecular function	GO:0016835	carbon-oxygen lyase activity	0.297004	Zm00001eb412980;Zm00001eb412960;Zm00001eb071090;Zm00001eb415070	4	Zm00001eb412980;Zm00001eb412960	2	Zm00001eb071090;Zm00001eb415070	2
Molecular function	GO:0051787	misfolded protein binding	0.303199	Zm00001eb148420	1	Zm00001eb148420	1	--	0
Molecular function	GO:1901618	organic hydroxy compound transmembrane transporter activity	0.303199	Zm00001eb166250	1	Zm00001eb166250	1	--	0
Molecular function	GO:0005249	voltage-gated potassium channel activity	0.31079	Zm00001eb361550	1	Zm00001eb361550	1	--	0
Molecular function	GO:0015179	L-amino acid transmembrane transporter activity	0.31079	Zm00001eb189540	1	--	0	Zm00001eb189540	1
Molecular function	GO:0015923	mannosidase activity	0.31079	Zm00001eb418490	1	Zm00001eb418490	1	--	0
Molecular function	GO:0016814	hydrolase activity, acting on carbon-nitrogen (but not peptide) bonds, in cyclic amidines	0.31079	Zm00001eb032010	1	--	0	Zm00001eb032010	1
Molecular function	GO:0016706	2-oxoglutarate-dependent dioxygenase activity	0.31687	Zm00001eb283860;Zm00001eb137930	2	Zm00001eb137930	1	Zm00001eb283860	1
Molecular function	GO:0005267	potassium channel activity	0.318299	Zm00001eb361550	1	Zm00001eb361550	1	--	0
Molecular function	GO:0005351	carbohydrate:proton symporter activity	0.318299	Zm00001eb166250	1	Zm00001eb166250	1	--	0
Molecular function	GO:0005402	carbohydrate:cation symporter activity	0.318299	Zm00001eb166250	1	Zm00001eb166250	1	--	0
Molecular function	GO:0016712	oxidoreductase activity, acting on paired donors, with incorporation or reduction of molecular oxygen, reduced flavin or flavoprotein as one donor, and incorporation of one atom of oxygen	0.318299	Zm00001eb118430	1	Zm00001eb118430	1	--	0
Molecular function	GO:0052745	inositol phosphate phosphatase activity	0.318299	Zm00001eb311920	1	--	0	Zm00001eb311920	1
Molecular function	GO:0004364	glutathione transferase activity	0.324851	novel.913;Zm00001eb156130	2	novel.913;Zm00001eb156130	2	--	0
Molecular function	GO:0001653	peptide receptor activity	0.325726	Zm00001eb101560	1	Zm00001eb101560	1	--	0
Molecular function	GO:0000287	magnesium ion binding	0.326373	Zm00001eb412980;Zm00001eb412960;Zm00001eb071090;Zm00001eb415070	4	Zm00001eb412980;Zm00001eb412960	2	Zm00001eb071090;Zm00001eb415070	2
Molecular function	GO:0003682	chromatin binding	0.32883	Zm00001eb234120;novel.897;novel.696;Zm00001eb206730	4	--	0	Zm00001eb234120;novel.897;novel.696;Zm00001eb206730	4
Molecular function	GO:0016307	phosphatidylinositol phosphate kinase activity	0.333073	Zm00001eb343470	1	Zm00001eb343470	1	--	0
Molecular function	GO:0022843	voltage-gated cation channel activity	0.333073	Zm00001eb361550	1	Zm00001eb361550	1	--	0
Molecular function	GO:0004439	phosphatidylinositol-4,5-bisphosphate 5-phosphatase activity	0.354638	Zm00001eb311920	1	--	0	Zm00001eb311920	1
Molecular function	GO:0016717	oxidoreductase activity, acting on paired donors, with oxidation of a pair of donors resulting in the reduction of molecular oxygen to two molecules of water	0.354638	Zm00001eb413200	1	Zm00001eb413200	1	--	0
Molecular function	GO:0106019	phosphatidylinositol-4,5-bisphosphate phosphatase activity	0.354638	Zm00001eb311920	1	--	0	Zm00001eb311920	1
Molecular function	GO:0016616	oxidoreductase activity, acting on the CH-OH group of donors, NAD or NADP as acceptor	0.358379	Zm00001eb119410;Zm00001eb248540;Zm00001eb159020;Zm00001eb088800	4	Zm00001eb119410;Zm00001eb248540	2	Zm00001eb159020;Zm00001eb088800	2
Molecular function	GO:0009678	pyrophosphate hydrolysis-driven proton transmembrane transporter activity	0.360428	Zm00001eb248980;Zm00001eb413480	2	Zm00001eb248980	1	Zm00001eb413480	1
Molecular function	GO:0015171	amino acid transmembrane transporter activity	0.360428	Zm00001eb161250;Zm00001eb189540	2	--	0	Zm00001eb161250;Zm00001eb189540	2
Molecular function	GO:0003714	transcription corepressor activity	0.361671	Zm00001eb267730	1	Zm00001eb267730	1	--	0
Molecular function	GO:0004427	inorganic diphosphate phosphatase activity	0.368627	Zm00001eb248980	1	Zm00001eb248980	1	--	0
Molecular function	GO:0046873	metal ion transmembrane transporter activity	0.369806	Zm00001eb406090;Zm00001eb361550;Zm00001eb381570;Zm00001eb163460;Zm00001eb274060	5	Zm00001eb406090;Zm00001eb361550;Zm00001eb381570;Zm00001eb163460;Zm00001eb274060	5	--	0
Molecular function	GO:0005509	calcium ion binding	0.379124	Zm00001eb225410;Zm00001eb347180;Zm00001eb099610;Zm00001eb350600;Zm00001eb151350;Zm00001eb362720	6	Zm00001eb350600	1	Zm00001eb225410;Zm00001eb347180;Zm00001eb099610;Zm00001eb151350;Zm00001eb362720	5
Molecular function	GO:0004712	protein serine/threonine/tyrosine kinase activity	0.379898	Zm00001eb368340;Zm00001eb009250	2	Zm00001eb368340	1	Zm00001eb009250	1
Molecular function	GO:0004713	protein tyrosine kinase activity	0.38897	Zm00001eb368340;Zm00001eb414870;Zm00001eb009250	3	Zm00001eb368340	1	Zm00001eb414870;Zm00001eb009250	2
Molecular function	GO:0015288	porin activity	0.389046	Zm00001eb308440	1	Zm00001eb308440	1	--	0
Molecular function	GO:0022829	wide pore channel activity	0.389046	Zm00001eb308440	1	Zm00001eb308440	1	--	0
Molecular function	GO:0051139	metal cation:proton antiporter activity	0.402292	Zm00001eb381570	1	Zm00001eb381570	1	--	0
Molecular function	GO:0019904	protein domain specific binding	0.408807	Zm00001eb324090	1	--	0	Zm00001eb324090	1
Molecular function	GO:0042277	peptide binding	0.414289	novel.913;Zm00001eb101560	2	novel.913;Zm00001eb101560	2	--	0
Molecular function	GO:0015295	solute:proton symporter activity	0.415252	Zm00001eb166250	1	Zm00001eb166250	1	--	0
Molecular function	GO:0043047	single-stranded telomeric DNA binding	0.421626	Zm00001eb043290	1	--	0	Zm00001eb043290	1
Molecular function	GO:0098847	sequence-specific single stranded DNA binding	0.421626	Zm00001eb043290	1	--	0	Zm00001eb043290	1
Molecular function	GO:0034595	phosphatidylinositol phosphate 5-phosphatase activity	0.427931	Zm00001eb311920	1	--	0	Zm00001eb311920	1
Molecular function	GO:0042285	xylosyltransferase activity	0.440337	Zm00001eb125890	1	Zm00001eb125890	1	--	0
Molecular function	GO:0097599	xylanase activity	0.440337	Zm00001eb418490	1	Zm00001eb418490	1	--	0
Molecular function	GO:0034593	phosphatidylinositol bisphosphate phosphatase activity	0.446439	Zm00001eb311920	1	--	0	Zm00001eb311920	1
Molecular function	GO:0015078	proton transmembrane transporter activity	0.453484	Zm00001eb248980;Zm00001eb381570;Zm00001eb413480;Zm00001eb166250	4	Zm00001eb248980;Zm00001eb381570;Zm00001eb166250	3	Zm00001eb413480	1
Molecular function	GO:0031406	carboxylic acid binding	0.454988	Zm00001eb364930;Zm00001eb137930	2	Zm00001eb364930;Zm00001eb137930	2	--	0
Molecular function	GO:0080044	quercetin 7-O-glucosyltransferase activity	0.46435	novel.484	1	--	0	novel.484	1
Molecular function	GO:0016614	oxidoreductase activity, acting on CH-OH group of donors	0.4654	Zm00001eb119410;Zm00001eb248540;Zm00001eb159020;Zm00001eb088800	4	Zm00001eb119410;Zm00001eb248540	2	Zm00001eb159020;Zm00001eb088800	2
Molecular function	GO:0003697	single-stranded DNA binding	0.469384	Zm00001eb043290;Zm00001eb226220	2	Zm00001eb226220	1	Zm00001eb043290	1
Molecular function	GO:0047262	polygalacturonate 4-alpha-galacturonosyltransferase activity	0.470191	Zm00001eb051970	1	--	0	Zm00001eb051970	1
Molecular function	GO:0052866	phosphatidylinositol phosphate phosphatase activity	0.470191	Zm00001eb311920	1	--	0	Zm00001eb311920	1
Molecular function	GO:0019900	kinase binding	0.472117	Zm00001eb360950;Zm00001eb155720;novel.2018	3	--	0	Zm00001eb360950;Zm00001eb155720;novel.2018	3
Molecular function	GO:0015103	inorganic anion transmembrane transporter activity	0.472948	Zm00001eb119430;Zm00001eb297200	2	Zm00001eb119430	1	Zm00001eb297200	1
Molecular function	GO:0015294	solute:cation symporter activity	0.475968	Zm00001eb166250	1	Zm00001eb166250	1	--	0
Molecular function	GO:0080043	quercetin 3-O-glucosyltransferase activity	0.475968	novel.484	1	--	0	novel.484	1
Molecular function	GO:0005216	ion channel activity	0.477674	Zm00001eb119430;Zm00001eb361550;Zm00001eb297200	3	Zm00001eb119430;Zm00001eb361550	2	Zm00001eb297200	1
Molecular function	GO:0050734	hydroxycinnamoyltransferase activity	0.481683	novel.1843	1	--	0	novel.1843	1
Molecular function	GO:0015145	monosaccharide transmembrane transporter activity	0.487336	Zm00001eb166250	1	Zm00001eb166250	1	--	0
Molecular function	GO:0031418	L-ascorbic acid binding	0.492927	Zm00001eb137930	1	Zm00001eb137930	1	--	0
Molecular function	GO:0042162	telomeric DNA binding	0.492927	Zm00001eb043290	1	--	0	Zm00001eb043290	1
Molecular function	GO:0042625	ATPase-coupled ion transmembrane transporter activity	0.492927	Zm00001eb413480	1	--	0	Zm00001eb413480	1
Molecular function	GO:0044769	ATPase activity, coupled to transmembrane movement of ions, rotational mechanism	0.492927	Zm00001eb413480	1	--	0	Zm00001eb413480	1
Molecular function	GO:0046961	proton-transporting ATPase activity, rotational mechanism	0.492927	Zm00001eb413480	1	--	0	Zm00001eb413480	1
Molecular function	GO:0097573	glutathione oxidoreductase activity	0.509339	Zm00001eb360150	1	--	0	Zm00001eb360150	1
Molecular function	GO:0016765	transferase activity, transferring alkyl or aryl (other than methyl) groups	0.513103	novel.913;Zm00001eb085620;Zm00001eb156130	3	novel.913;Zm00001eb156130	2	Zm00001eb085620	1
Molecular function	GO:0005451	monovalent cation:proton antiporter activity	0.519984	Zm00001eb381570	1	Zm00001eb381570	1	--	0
Molecular function	GO:0015299	solute:proton antiporter activity	0.519984	Zm00001eb381570	1	Zm00001eb381570	1	--	0
Molecular function	GO:0033293	monocarboxylic acid binding	0.519984	Zm00001eb364930	1	Zm00001eb364930	1	--	0
Molecular function	GO:0016779	nucleotidyltransferase activity	0.535468	novel.1995;novel.1612;novel.67;novel.666;novel.1374	5	novel.1995	1	novel.1612;novel.67;novel.666;novel.1374	4
Molecular function	GO:0033218	amide binding	0.537812	novel.913;Zm00001eb101560	2	novel.913;Zm00001eb101560	2	--	0
Molecular function	GO:0004180	carboxypeptidase activity	0.540591	Zm00001eb357270	1	Zm00001eb357270	1	--	0
Molecular function	GO:0140030	modification-dependent protein binding	0.540591	Zm00001eb113970	1	Zm00001eb113970	1	--	0
Molecular function	GO:1901681	sulfur compound binding	0.550561	novel.913	1	novel.913	1	--	0
Molecular function	GO:0004866	endopeptidase inhibitor activity	0.555465	Zm00001eb203420	1	Zm00001eb203420	1	--	0
Molecular function	GO:0030414	peptidase inhibitor activity	0.555465	Zm00001eb203420	1	Zm00001eb203420	1	--	0
Molecular function	GO:0008378	galactosyltransferase activity	0.560315	Zm00001eb034810	1	Zm00001eb034810	1	--	0
Molecular function	GO:0061135	endopeptidase regulator activity	0.560315	Zm00001eb203420	1	Zm00001eb203420	1	--	0
Molecular function	GO:0034062	5'-3' RNA polymerase activity	0.563436	novel.1995;novel.1374	2	novel.1995	1	novel.1374	1
Molecular function	GO:0097747	RNA polymerase activity	0.563436	novel.1995;novel.1374	2	novel.1995	1	novel.1374	1
Molecular function	GO:0004650	polygalacturonase activity	0.565113	Zm00001eb356620	1	Zm00001eb356620	1	--	0
Molecular function	GO:0016628	oxidoreductase activity, acting on the CH-CH group of donors, NAD or NADP as acceptor	0.565113	Zm00001eb300570	1	Zm00001eb300570	1	--	0
Molecular function	GO:0061134	peptidase regulator activity	0.565113	Zm00001eb203420	1	Zm00001eb203420	1	--	0
Molecular function	GO:0035251	UDP-glucosyltransferase activity	0.577452	Zm00001eb323760;Zm00001eb040830;novel.484	3	Zm00001eb323760	1	Zm00001eb040830;novel.484	2
Molecular function	GO:0005342	organic acid transmembrane transporter activity	0.578929	Zm00001eb161250;Zm00001eb189540	2	--	0	Zm00001eb161250;Zm00001eb189540	2
Molecular function	GO:0046943	carboxylic acid transmembrane transporter activity	0.578929	Zm00001eb161250;Zm00001eb189540	2	--	0	Zm00001eb161250;Zm00001eb189540	2
Molecular function	GO:0004540	ribonuclease activity	0.579914	Zm00001eb065660;novel.451;Zm00001eb125480	3	Zm00001eb125480	1	Zm00001eb065660;novel.451	2
Molecular function	GO:0016709	oxidoreductase activity, acting on paired donors, with incorporation or reduction of molecular oxygen, NAD(P)H as one donor, and incorporation of one atom of oxygen	0.581978	Zm00001eb251960;Zm00001eb118430	2	Zm00001eb118430	1	Zm00001eb251960	1
Molecular function	GO:0015925	galactosidase activity	0.583788	Zm00001eb418490	1	Zm00001eb418490	1	--	0
Molecular function	GO:0005507	copper ion binding	0.59103	Zm00001eb004180;Zm00001eb266940	2	Zm00001eb266940	1	Zm00001eb004180	1
Molecular function	GO:0048029	monosaccharide binding	0.592824	Zm00001eb137930	1	Zm00001eb137930	1	--	0
Molecular function	GO:0008168	methyltransferase activity	0.593286	Zm00001eb292890;Zm00001eb267640;Zm00001eb371810;Zm00001eb371800;Zm00001eb292840	5	Zm00001eb292890	1	Zm00001eb267640;Zm00001eb371810;Zm00001eb371800;Zm00001eb292840	4
Molecular function	GO:0000978	RNA polymerase II cis-regulatory region sequence-specific DNA binding	0.601659	Zm00001eb234690;Zm00001eb214440;Zm00001eb428800	3	Zm00001eb428800	1	Zm00001eb234690;Zm00001eb214440	2
Molecular function	GO:0000981	DNA-binding transcription factor activity, RNA polymerase II-specific	0.603367	novel.733;Zm00001eb234690;Zm00001eb235510;Zm00001eb214440	4	--	0	novel.733;Zm00001eb234690;Zm00001eb235510;Zm00001eb214440	4
Molecular function	GO:0016168	chlorophyll binding	0.618775	Zm00001eb324090	1	--	0	Zm00001eb324090	1
Molecular function	GO:0000987	cis-regulatory region sequence-specific DNA binding	0.638455	Zm00001eb234690;Zm00001eb214440;Zm00001eb428800	3	Zm00001eb428800	1	Zm00001eb234690;Zm00001eb214440	2
Molecular function	GO:0005319	lipid transporter activity	0.639137	Zm00001eb205350	1	Zm00001eb205350	1	--	0
Molecular function	GO:0003684	damaged DNA binding	0.654644	Zm00001eb043290	1	--	0	Zm00001eb043290	1
Molecular function	GO:0005085	guanyl-nucleotide exchange factor activity	0.654644	Zm00001eb347730	1	Zm00001eb347730	1	--	0
Molecular function	GO:0051119	sugar transmembrane transporter activity	0.662146	Zm00001eb166250	1	Zm00001eb166250	1	--	0
Molecular function	GO:0003777	microtubule motor activity	0.673096	Zm00001eb413230	1	--	0	Zm00001eb413230	1
Molecular function	GO:0004675	transmembrane receptor protein serine/threonine kinase activity	0.673096	Zm00001eb174500	1	Zm00001eb174500	1	--	0
Molecular function	GO:0004843	cysteine-type deubiquitinase activity	0.680199	Zm00001eb357270	1	Zm00001eb357270	1	--	0
Molecular function	GO:0008422	beta-glucosidase activity	0.700598	Zm00001eb418490	1	Zm00001eb418490	1	--	0
Molecular function	GO:0140662	ATP-dependent protein folding chaperone	0.7197	Zm00001eb148420	1	Zm00001eb148420	1	--	0
Molecular function	GO:0015035	protein-disulfide reductase activity	0.725794	Zm00001eb360150	1	--	0	Zm00001eb360150	1
Molecular function	GO:0015144	carbohydrate transmembrane transporter activity	0.737588	Zm00001eb166250	1	Zm00001eb166250	1	--	0
Molecular function	GO:0015036	disulfide oxidoreductase activity	0.743294	Zm00001eb360150	1	--	0	Zm00001eb360150	1
Molecular function	GO:0008047	enzyme activator activity	0.748197	Zm00001eb231420;Zm00001eb009250	2	--	0	Zm00001eb231420;Zm00001eb009250	2
Molecular function	GO:0015926	glucosidase activity	0.751622	Zm00001eb418490	1	Zm00001eb418490	1	--	0
Molecular function	GO:0016830	carbon-carbon lyase activity	0.752214	Zm00001eb416690;Zm00001eb135830	2	Zm00001eb416690;Zm00001eb135830	2	--	0
Molecular function	GO:0008238	exopeptidase activity	0.754337	Zm00001eb357270	1	Zm00001eb357270	1	--	0
Molecular function	GO:0003774	cytoskeletal motor activity	0.762308	Zm00001eb413230	1	--	0	Zm00001eb413230	1
Molecular function	GO:0044183	protein folding chaperone	0.770021	Zm00001eb148420	1	Zm00001eb148420	1	--	0
Molecular function	GO:0016627	oxidoreductase activity, acting on the CH-CH group of donors	0.779919	Zm00001eb300570	1	Zm00001eb300570	1	--	0
Molecular function	GO:0031072	heat shock protein binding	0.779919	Zm00001eb148420	1	Zm00001eb148420	1	--	0
Molecular function	GO:0043177	organic acid binding	0.779919	Zm00001eb137930	1	Zm00001eb137930	1	--	0
Molecular function	GO:0101005	deubiquitinase activity	0.791696	Zm00001eb357270	1	Zm00001eb357270	1	--	0
Molecular function	GO:0005516	calmodulin binding	0.791892	Zm00001eb160050;Zm00001eb357290;Zm00001eb425100;Zm00001eb335390	4	--	0	Zm00001eb160050;Zm00001eb357290;Zm00001eb425100;Zm00001eb335390	4
Molecular function	GO:0005543	phospholipid binding	0.79457	Zm00001eb285360;Zm00001eb148310	2	Zm00001eb285360	1	Zm00001eb148310	1
Molecular function	GO:0008509	anion transmembrane transporter activity	0.797934	Zm00001eb119430;Zm00001eb297200	2	Zm00001eb119430	1	Zm00001eb297200	1
Molecular function	GO:0016831	carboxy-lyase activity	0.800664	Zm00001eb416690	1	Zm00001eb416690	1	--	0
Molecular function	GO:0008234	cysteine-type peptidase activity	0.802889	novel.40;Zm00001eb357270	2	Zm00001eb357270	1	novel.40	1
Molecular function	GO:0019843	rRNA binding	0.810908	Zm00001eb273740;Zm00001eb413490	2	--	0	Zm00001eb273740;Zm00001eb413490	2
Molecular function	GO:0016667	oxidoreductase activity, acting on a sulfur group of donors	0.813399	Zm00001eb360150	1	--	0	Zm00001eb360150	1
Molecular function	GO:0005261	cation channel activity	0.821436	Zm00001eb361550	1	Zm00001eb361550	1	--	0
Molecular function	GO:0019829	ATPase-coupled cation transmembrane transporter activity	0.825324	Zm00001eb413480	1	--	0	Zm00001eb413480	1
Molecular function	GO:0004521	endoribonuclease activity	0.827236	Zm00001eb125480	1	Zm00001eb125480	1	--	0
Molecular function	GO:0019783	ubiquitin-like protein peptidase activity	0.830998	Zm00001eb357270	1	Zm00001eb357270	1	--	0
Molecular function	GO:0031625	ubiquitin protein ligase binding	0.834678	Zm00001eb148420	1	Zm00001eb148420	1	--	0
Molecular function	GO:0140359	ABC-type transporter activity	0.836489	Zm00001eb205350	1	Zm00001eb205350	1	--	0
Molecular function	GO:0016810	hydrolase activity, acting on carbon-nitrogen (but not peptide) bonds	0.845247	Zm00001eb032010	1	--	0	Zm00001eb032010	1
Molecular function	GO:0035091	phosphatidylinositol binding	0.845247	Zm00001eb285360	1	Zm00001eb285360	1	--	0
Molecular function	GO:0044389	ubiquitin-like protein ligase binding	0.850277	Zm00001eb148420	1	Zm00001eb148420	1	--	0
Molecular function	GO:0015399	primary active transmembrane transporter activity	0.868034	Zm00001eb248980;Zm00001eb205350;Zm00001eb413480	3	Zm00001eb248980;Zm00001eb205350	2	Zm00001eb413480	1
Molecular function	GO:0042393	histone binding	0.870254	Zm00001eb113970	1	Zm00001eb113970	1	--	0
Molecular function	GO:0003712	transcription coregulator activity	0.888806	Zm00001eb267730	1	Zm00001eb267730	1	--	0
Molecular function	GO:0042626	ATPase-coupled transmembrane transporter activity	0.893425	Zm00001eb205350;Zm00001eb413480	2	Zm00001eb205350	1	Zm00001eb413480	1
Molecular function	GO:0015293	symporter activity	0.895924	Zm00001eb166250	1	Zm00001eb166250	1	--	0
Molecular function	GO:0019199	transmembrane receptor protein kinase activity	0.900416	Zm00001eb174500	1	Zm00001eb174500	1	--	0
Molecular function	GO:0046982	protein heterodimerization activity	0.902588	Zm00001eb326450	1	Zm00001eb326450	1	--	0
Molecular function	GO:0038023	signaling receptor activity	0.918271	Zm00001eb101560;Zm00001eb174500	2	Zm00001eb101560;Zm00001eb174500	2	--	0
Molecular function	GO:0030695	GTPase regulator activity	0.923585	Zm00001eb347730	1	Zm00001eb347730	1	--	0
Molecular function	GO:0060589	nucleoside-triphosphatase regulator activity	0.923585	Zm00001eb347730	1	Zm00001eb347730	1	--	0
Molecular function	GO:0060089	molecular transducer activity	0.928552	Zm00001eb101560;Zm00001eb174500	2	Zm00001eb101560;Zm00001eb174500	2	--	0
Molecular function	GO:0051082	unfolded protein binding	0.930045	Zm00001eb148420	1	Zm00001eb148420	1	--	0
Molecular function	GO:0004857	enzyme inhibitor activity	0.931573	Zm00001eb203420	1	Zm00001eb203420	1	--	0
Molecular function	GO:0004888	transmembrane signaling receptor activity	0.93736	Zm00001eb174500	1	Zm00001eb174500	1	--	0
Molecular function	GO:0009055	electron transfer activity	0.945139	Zm00001eb380140	1	Zm00001eb380140	1	--	0
Molecular function	GO:0016853	isomerase activity	0.953423	Zm00001eb412980;Zm00001eb412960	2	Zm00001eb412980;Zm00001eb412960	2	--	0
Molecular function	GO:0008017	microtubule binding	0.961061	Zm00001eb413230	1	--	0	Zm00001eb413230	1
Molecular function	GO:0003924	GTPase activity	0.970476	Zm00001eb046090	1	Zm00001eb046090	1	--	0
Molecular function	GO:0015631	tubulin binding	0.971123	Zm00001eb413230	1	--	0	Zm00001eb413230	1
Molecular function	GO:0017018	myosin phosphatase activity	0.975544	Zm00001eb013450	1	--	0	Zm00001eb013450	1
Molecular function	GO:0004722	protein serine/threonine phosphatase activity	0.975814	Zm00001eb013450	1	--	0	Zm00001eb013450	1
Molecular function	GO:0044877	protein-containing complex binding	0.979291	Zm00001eb413220	1	--	0	Zm00001eb413220	1
Molecular function	GO:0004386	helicase activity	0.982072	Zm00001eb043290	1	--	0	Zm00001eb043290	1
Molecular function	GO:0004721	phosphoprotein phosphatase activity	0.986862	Zm00001eb013450	1	--	0	Zm00001eb013450	1
Molecular function	GO:0005525	GTP binding	0.993333	Zm00001eb046090	1	Zm00001eb046090	1	--	0
Molecular function	GO:0019001	guanyl nucleotide binding	0.994724	Zm00001eb046090	1	Zm00001eb046090	1	--	0
Molecular function	GO:0032561	guanyl ribonucleotide binding	0.994724	Zm00001eb046090	1	Zm00001eb046090	1	--	0
