# Supplementary material for: ZmNAC17 Regulates Mesocotyl Elongation by Mediating Auxin and ROS Biosynthetic Pathways in Maize
Source: Int J Mol Sci. 2024 Apr 23;25(9):4585. doi: 10.3390/ijms25094585 (PMC11083593; doi:10.3390/ijms25094585)
Supplement: Supplementary file 1 [file ijms-25-04585-s001.zip › ijms-2928753-Supplementary Table 4.xlsx]

## Sheet: KEGG enrichment
ID	KEGG_level_1	KEGG_level_2	Description	Pvalue	geneID	Count	Up_gene	Up	Down_gene	Down
ko04016	Environmental Information Processing	Signal transduction	MAPK signaling pathway - plant	2.18432e-07	Zm00001eb234120;Zm00001eb275080;Zm00001eb286490;Zm00001eb206730;Zm00001eb390330;Zm00001eb310270;Zm00001eb056760;Zm00001eb350280;Zm00001eb215740;Zm00001eb346880;Zm00001eb307550;Zm00001eb272090;Zm00001eb331080;Zm00001eb149570;Zm00001eb009250;Zm00001eb178550;Zm00001eb360950;Zm00001eb073290;Zm00001eb155720;Zm00001eb299340;Zm00001eb101560;Zm00001eb358680;Zm00001eb257320;novel.2018	24	Zm00001eb272090;Zm00001eb299340;Zm00001eb101560;Zm00001eb257320	4	Zm00001eb234120;Zm00001eb275080;Zm00001eb286490;Zm00001eb206730;Zm00001eb390330;Zm00001eb310270;Zm00001eb056760;Zm00001eb350280;Zm00001eb215740;Zm00001eb346880;Zm00001eb307550;Zm00001eb331080;Zm00001eb149570;Zm00001eb009250;Zm00001eb178550;Zm00001eb360950;Zm00001eb073290;Zm00001eb155720;Zm00001eb358680;novel.2018	20
ko04075	Environmental Information Processing	Signal transduction	Plant hormone signal transduction	0.000502783	Zm00001eb341630;novel.2202;Zm00001eb006000;Zm00001eb390330;Zm00001eb056760;Zm00001eb215740;Zm00001eb301590;novel.1881;Zm00001eb223620;Zm00001eb048780;Zm00001eb071650;Zm00001eb241870;Zm00001eb307550;Zm00001eb429850;Zm00001eb314010;Zm00001eb005990;Zm00001eb052590;Zm00001eb331080;Zm00001eb005980;Zm00001eb048770;Zm00001eb100380;Zm00001eb023350;Zm00001eb299340;Zm00001eb349490;Zm00001eb257320	25	Zm00001eb241870;Zm00001eb429850;Zm00001eb023350;Zm00001eb299340;Zm00001eb257320	5	Zm00001eb341630;novel.2202;Zm00001eb006000;Zm00001eb390330;Zm00001eb056760;Zm00001eb215740;Zm00001eb301590;novel.1881;Zm00001eb223620;Zm00001eb048780;Zm00001eb071650;Zm00001eb307550;Zm00001eb314010;Zm00001eb005990;Zm00001eb052590;Zm00001eb331080;Zm00001eb005980;Zm00001eb048770;Zm00001eb100380;Zm00001eb349490	20
ko00940	Metabolism	Biosynthesis of other secondary metabolites	Phenylpropanoid biosynthesis	0.000530097	Zm00001eb316920;Zm00001eb374630;Zm00001eb330530;Zm00001eb333290;Zm00001eb111420;Zm00001eb226370;Zm00001eb333000;Zm00001eb109910;Zm00001eb167090;Zm00001eb088800;Zm00001eb348950;novel.1843	12	Zm00001eb316920;Zm00001eb374630;Zm00001eb226370;Zm00001eb109910;Zm00001eb167090	5	Zm00001eb330530;Zm00001eb333290;Zm00001eb111420;Zm00001eb333000;Zm00001eb088800;Zm00001eb348950;novel.1843	7
ko00909	Metabolism	Metabolism of terpenoids and polyketides	Sesquiterpenoid and triterpenoid biosynthesis	0.00108602	Zm00001eb412980;Zm00001eb412960;Zm00001eb071090;Zm00001eb415070	4	Zm00001eb412980;Zm00001eb412960	2	Zm00001eb071090;Zm00001eb415070	2
ko00380	Metabolism	Amino acid metabolism	Tryptophan metabolism	0.00714464	Zm00001eb396770;Zm00001eb396780;Zm00001eb396760;Zm00001eb416690;Zm00001eb396790	5	Zm00001eb416690	1	Zm00001eb396770;Zm00001eb396780;Zm00001eb396760;Zm00001eb396790	4
ko03440	Genetic Information Processing	Replication and repair	Homologous recombination	0.0125076	Zm00001eb163740;Zm00001eb381850;Zm00001eb043280;Zm00001eb043290;Zm00001eb226220;Zm00001eb171920	6	Zm00001eb381850;Zm00001eb226220;Zm00001eb171920	3	Zm00001eb163740;Zm00001eb043280;Zm00001eb043290	3
ko03250	Genetic Information Processing	Information processing in viruses	Viral life cycle - HIV-1	0.0126998	novel.897;novel.696;Zm00001eb058970;Zm00001eb231420	4	--	0	novel.897;novel.696;Zm00001eb058970;Zm00001eb231420	4
ko04626	Organismal Systems	Environmental adaptation	Plant-pathogen interaction	0.0232009	Zm00001eb234120;Zm00001eb275080;Zm00001eb347180;Zm00001eb286490;Zm00001eb206730;Zm00001eb310270;Zm00001eb350280;Zm00001eb099610;Zm00001eb346880;Zm00001eb319700;Zm00001eb312330;Zm00001eb388620;Zm00001eb149570;Zm00001eb178550;Zm00001eb077540;Zm00001eb299340;Zm00001eb174500;Zm00001eb350600;Zm00001eb042020;Zm00001eb358680;Zm00001eb257320;Zm00001eb362720	22	Zm00001eb299340;Zm00001eb174500;Zm00001eb350600;Zm00001eb257320	4	Zm00001eb234120;Zm00001eb275080;Zm00001eb347180;Zm00001eb286490;Zm00001eb206730;Zm00001eb310270;Zm00001eb350280;Zm00001eb099610;Zm00001eb346880;Zm00001eb319700;Zm00001eb312330;Zm00001eb388620;Zm00001eb149570;Zm00001eb178550;Zm00001eb077540;Zm00001eb042020;Zm00001eb358680;Zm00001eb362720	18
ko00906	Metabolism	Metabolism of terpenoids and polyketides	Carotenoid biosynthesis	0.0315876	Zm00001eb251960;Zm00001eb300240;Zm00001eb403180;Zm00001eb218680	4	Zm00001eb403180;Zm00001eb218680	2	Zm00001eb251960;Zm00001eb300240	2
ko01110	Metabolism	Global and overview maps	Biosynthesis of secondary metabolites	0.0605501	Zm00001eb119410;Zm00001eb406090;Zm00001eb316920;Zm00001eb292890;Zm00001eb251960;Zm00001eb300240;Zm00001eb403180;Zm00001eb283860;Zm00001eb374630;Zm00001eb330530;Zm00001eb333290;Zm00001eb142200;Zm00001eb248540;Zm00001eb267640;Zm00001eb111420;Zm00001eb105580;Zm00001eb226370;Zm00001eb071090;Zm00001eb418490;Zm00001eb333000;Zm00001eb073290;Zm00001eb109910;Zm00001eb167090;Zm00001eb137930;Zm00001eb292840…	41	Zm00001eb119410;Zm00001eb406090;Zm00001eb316920;Zm00001eb292890;Zm00001eb403180;Zm00001eb374630;Zm00001eb248540;Zm00001eb226370;Zm00001eb418490;Zm00001eb109910;Zm00001eb167090;Zm00001eb137930;Zm00001eb416690;Zm00001eb300570;Zm00001eb218680;Zm00001eb135830;Zm00001eb203230;Zm00001eb312250	18	Zm00001eb251960;Zm00001eb300240;Zm00001eb283860;Zm00001eb330530;Zm00001eb333290;Zm00001eb142200;Zm00001eb267640;Zm00001eb111420;Zm00001eb105580;Zm00001eb071090;Zm00001eb333000;Zm00001eb073290;Zm00001eb292840;Zm00001eb159020;Zm00001eb088800;Zm00001eb092540;Zm00001eb348950;novel.1843;novel.484;Zm00001eb055950;Zm00001eb387720;novel.560;Zm00001eb413510	23
ko00965	Metabolism	Biosynthesis of other secondary metabolites	Betalain biosynthesis	0.114204	Zm00001eb416690	1	Zm00001eb416690	1	--	0
ko00760	Metabolism	Metabolism of cofactors and vitamins	Nicotinate and nicotinamide metabolism	0.117652	Zm00001eb063350;Zm00001eb413510	2	--	0	Zm00001eb063350;Zm00001eb413510	2
ko00999	Metabolism	Biosynthesis of other secondary metabolites	Biosynthesis of various plant secondary metabolites	0.122434	Zm00001eb418490;Zm00001eb137930;Zm00001eb203230	3	Zm00001eb418490;Zm00001eb137930;Zm00001eb203230	3	--	0
ko03450	Genetic Information Processing	Replication and repair	Non-homologous end-joining	0.124886	Zm00001eb171920	1	Zm00001eb171920	1	--	0
ko00941	Metabolism	Biosynthesis of other secondary metabolites	Flavonoid biosynthesis	0.152768	Zm00001eb167090;Zm00001eb159020;novel.1843	3	Zm00001eb167090	1	Zm00001eb159020;novel.1843	2
ko03008	Genetic Information Processing	Translation	Ribosome biogenesis in eukaryotes	0.153864	novel.897;novel.696;Zm00001eb390860;Zm00001eb040830	4	Zm00001eb390860	1	novel.897;novel.696;Zm00001eb040830	3
ko00902	Metabolism	Metabolism of terpenoids and polyketides	Monoterpenoid biosynthesis	0.215445	Zm00001eb248540	1	Zm00001eb248540	1	--	0
ko00908	Metabolism	Metabolism of terpenoids and polyketides	Zeatin biosynthesis	0.228523	novel.484;Zm00001eb312250	2	Zm00001eb312250	1	novel.484	1
ko00945	Metabolism	Biosynthesis of other secondary metabolites	Stilbenoid, diarylheptanoid and gingerol biosynthesis	0.232975	Zm00001eb167090;novel.1843	2	Zm00001eb167090	1	novel.1843	1
ko03430	Genetic Information Processing	Replication and repair	Mismatch repair	0.247957	Zm00001eb043280;Zm00001eb043290;Zm00001eb226220	3	Zm00001eb226220	1	Zm00001eb043280;Zm00001eb043290	2
ko00402	Metabolism	Biosynthesis of other secondary metabolites	Benzoxazinoid biosynthesis	0.259776	Zm00001eb292890;Zm00001eb292840	2	Zm00001eb292890	1	Zm00001eb292840	1
ko00670	Metabolism	Metabolism of cofactors and vitamins	One carbon pool by folate	0.27939	novel.560	1	--	0	novel.560	1
ko00260	Metabolism	Amino acid metabolism	Glycine, serine and threonine metabolism	0.283787	Zm00001eb208270;Zm00001eb387720;novel.560	3	Zm00001eb208270	1	Zm00001eb387720;novel.560	2
ko00950	Metabolism	Biosynthesis of other secondary metabolites	Isoquinoline alkaloid biosynthesis	0.288093	Zm00001eb416690	1	Zm00001eb416690	1	--	0
ko04712	Organismal Systems	Environmental adaptation	Circadian rhythm - plant	0.319913	novel.1888;Zm00001eb390860;Zm00001eb235510;Zm00001eb023350	4	novel.1888;Zm00001eb390860;Zm00001eb023350	3	Zm00001eb235510	1
ko03013	Genetic Information Processing	Translation	Nucleocytoplasmic transport	0.325379	novel.897;novel.696;novel.296;Zm00001eb400520	4	novel.296;Zm00001eb400520	2	novel.897;novel.696	2
ko03030	Genetic Information Processing	Replication and repair	DNA replication	0.329946	Zm00001eb043280;Zm00001eb043290;Zm00001eb226220	3	Zm00001eb226220	1	Zm00001eb043280;Zm00001eb043290	2
ko00196	Metabolism	Energy metabolism	Photosynthesis - antenna proteins	0.330062	Zm00001eb324090	1	--	0	Zm00001eb324090	1
ko03420	Genetic Information Processing	Replication and repair	Nucleotide excision repair	0.343157	Zm00001eb043280;Zm00001eb043290;Zm00001eb226220	3	Zm00001eb226220	1	Zm00001eb043280;Zm00001eb043290	2
ko00460	Metabolism	Metabolism of other amino acids	Cyanoamino acid metabolism	0.353036	Zm00001eb418490;novel.560	2	Zm00001eb418490	1	novel.560	1
ko04145	Cellular Processes	Transport and catabolism	Phagosome	0.359644	Zm00001eb343470;novel.666;Zm00001eb413480	3	Zm00001eb343470	1	novel.666;Zm00001eb413480	2
ko00860	Metabolism	Metabolism of cofactors and vitamins	Porphyrin metabolism	0.383352	Zm00001eb119410;Zm00001eb406090	2	Zm00001eb119410;Zm00001eb406090	2	--	0
ko00944	Metabolism	Biosynthesis of other secondary metabolites	Flavone and flavonol biosynthesis	0.461801	Zm00001eb105580	1	--	0	Zm00001eb105580	1
ko00904	Metabolism	Metabolism of terpenoids and polyketides	Diterpenoid biosynthesis	0.487385	Zm00001eb283860	1	--	0	Zm00001eb283860	1
ko00905	Metabolism	Metabolism of terpenoids and polyketides	Brassinosteroid biosynthesis	0.493589	Zm00001eb300570	1	Zm00001eb300570	1	--	0
ko00360	Metabolism	Amino acid metabolism	Phenylalanine metabolism	0.523512	Zm00001eb416690	1	Zm00001eb416690	1	--	0
ko00270	Metabolism	Amino acid metabolism	Cysteine and methionine metabolism	0.532423	novel.67;Zm00001eb073290;Zm00001eb055950	3	--	0	novel.67;Zm00001eb073290;Zm00001eb055950	3
ko00350	Metabolism	Amino acid metabolism	Tyrosine metabolism	0.534983	Zm00001eb416690	1	Zm00001eb416690	1	--	0
ko00710	Metabolism	Energy metabolism	Carbon fixation in photosynthetic organisms	0.535023	Zm00001eb109370;Zm00001eb092540	2	Zm00001eb109370	1	Zm00001eb092540	1
ko00220	Metabolism	Amino acid metabolism	Arginine biosynthesis	0.54618	Zm00001eb109370	1	Zm00001eb109370	1	--	0
ko00100	Metabolism	Lipid metabolism	Steroid biosynthesis	0.557109	Zm00001eb135830	1	Zm00001eb135830	1	--	0
ko00630	Metabolism	Carbohydrate metabolism	Glyoxylate and dicarboxylate metabolism	0.604082	Zm00001eb092540;novel.560	2	--	0	Zm00001eb092540;novel.560	2
ko00562	Metabolism	Carbohydrate metabolism	Inositol phosphate metabolism	0.626367	Zm00001eb343470;Zm00001eb311920	2	Zm00001eb343470	1	Zm00001eb311920	1
ko00400	Metabolism	Amino acid metabolism	Phenylalanine, tyrosine and tryptophan biosynthesis	0.63116	Zm00001eb387720	1	--	0	Zm00001eb387720	1
ko00592	Metabolism	Lipid metabolism	alpha-Linolenic acid metabolism	0.640055	Zm00001eb267640	1	--	0	Zm00001eb267640	1
ko00480	Metabolism	Metabolism of other amino acids	Glutathione metabolism	0.647675	novel.913;Zm00001eb156130	2	novel.913;Zm00001eb156130	2	--	0
ko00195	Metabolism	Energy metabolism	Photosynthesis	0.670846	Zm00001eb273380;Zm00001eb405610	2	Zm00001eb405610	1	Zm00001eb273380	1
ko00900	Metabolism	Metabolism of terpenoids and polyketides	Terpenoid backbone biosynthesis	0.685302	Zm00001eb071090	1	--	0	Zm00001eb071090	1
ko03018	Genetic Information Processing	Folding, sorting and degradation	RNA degradation	0.709386	Zm00001eb065660;novel.451;Zm00001eb424430	3	--	0	Zm00001eb065660;novel.451;Zm00001eb424430	3
ko04120	Genetic Information Processing	Folding, sorting and degradation	Ubiquitin mediated proteolysis	0.719834	Zm00001eb290550;Zm00001eb243070;Zm00001eb010210	3	--	0	Zm00001eb290550;Zm00001eb243070;Zm00001eb010210	3
ko01210	Metabolism	Global and overview maps	2-Oxocarboxylic acid metabolism	0.738032	Zm00001eb109370	1	Zm00001eb109370	1	--	0
ko03050	Genetic Information Processing	Folding, sorting and degradation	Proteasome	0.756576	Zm00001eb368340	1	Zm00001eb368340	1	--	0
ko00250	Metabolism	Amino acid metabolism	Alanine, aspartate and glutamate metabolism	0.776569	Zm00001eb109370	1	Zm00001eb109370	1	--	0
ko00240	Metabolism	Nucleotide metabolism	Pyrimidine metabolism	0.807121	Zm00001eb413510	1	--	0	Zm00001eb413510	1
ko04070	Environmental Information Processing	Signal transduction	Phosphatidylinositol signaling system	0.820802	Zm00001eb343470	1	Zm00001eb343470	1	--	0
ko02010	Environmental Information Processing	Membrane transport	ABC transporters	0.829383	Zm00001eb205350	1	Zm00001eb205350	1	--	0
ko03040	Genetic Information Processing	Transcription	Spliceosome	0.86972	Zm00001eb343760;Zm00001eb148420;Zm00001eb029370	3	Zm00001eb148420;Zm00001eb029370	2	Zm00001eb343760	1
ko00561	Metabolism	Lipid metabolism	Glycerolipid metabolism	0.869778	Zm00001eb034810	1	Zm00001eb034810	1	--	0
ko01232	Metabolism	Global and overview maps	Nucleotide metabolism	0.877542	Zm00001eb413510	1	--	0	Zm00001eb413510	1
ko04141	Genetic Information Processing	Folding, sorting and degradation	Protein processing in endoplasmic reticulum	0.877999	Zm00001eb290550;Zm00001eb148420;Zm00001eb243070;Zm00001eb010210	4	Zm00001eb148420	1	Zm00001eb290550;Zm00001eb243070;Zm00001eb010210	3
ko00620	Metabolism	Carbohydrate metabolism	Pyruvate metabolism	0.884847	Zm00001eb413220	1	--	0	Zm00001eb413220	1
ko00190	Metabolism	Energy metabolism	Oxidative phosphorylation	0.887236	novel.666;Zm00001eb413480	2	--	0	novel.666;Zm00001eb413480	2
ko01100	Metabolism	Global and overview maps	Metabolic pathways	0.887775	Zm00001eb343470;Zm00001eb119410;Zm00001eb406090;Zm00001eb316920;Zm00001eb300240;Zm00001eb403180;Zm00001eb374630;Zm00001eb330530;Zm00001eb396770;novel.67;Zm00001eb333290;Zm00001eb142200;Zm00001eb396780;Zm00001eb109370;novel.666;Zm00001eb111420;Zm00001eb273380;Zm00001eb272090;Zm00001eb226370;Zm00001eb413220;Zm00001eb063350;Zm00001eb396760;Zm00001eb418490;Zm00001eb333000;Zm00001eb073290;Zm00001eb109…	53	Zm00001eb343470;Zm00001eb119410;Zm00001eb406090;Zm00001eb316920;Zm00001eb403180;Zm00001eb374630;Zm00001eb109370;Zm00001eb272090;Zm00001eb226370;Zm00001eb418490;Zm00001eb109910;Zm00001eb405610;novel.913;Zm00001eb167090;Zm00001eb137930;Zm00001eb416690;Zm00001eb034810;Zm00001eb300570;Zm00001eb218680;Zm00001eb135830;Zm00001eb203230;Zm00001eb156130;Zm00001eb356620;Zm00001eb208270;Zm00001eb312250	25	Zm00001eb300240;Zm00001eb330530;Zm00001eb396770;novel.67;Zm00001eb333290;Zm00001eb142200;Zm00001eb396780;novel.666;Zm00001eb111420;Zm00001eb273380;Zm00001eb413220;Zm00001eb063350;Zm00001eb396760;Zm00001eb333000;Zm00001eb073290;Zm00001eb413480;Zm00001eb159020;Zm00001eb088800;Zm00001eb396790;Zm00001eb092540;Zm00001eb311920;Zm00001eb348950;novel.1843;Zm00001eb055950;Zm00001eb387720;novel.560;Zm00001…	28
ko00040	Metabolism	Carbohydrate metabolism	Pentose and glucuronate interconversions	0.900659	Zm00001eb356620	1	Zm00001eb356620	1	--	0
ko01230	Metabolism	Global and overview maps	Biosynthesis of amino acids	0.900776	Zm00001eb109370;Zm00001eb387720;novel.560	3	Zm00001eb109370	1	Zm00001eb387720;novel.560	2
ko00230	Metabolism	Nucleotide metabolism	Purine metabolism	0.909983	Zm00001eb413510	1	--	0	Zm00001eb413510	1
ko00564	Metabolism	Lipid metabolism	Glycerophospholipid metabolism	0.927903	Zm00001eb142200	1	--	0	Zm00001eb142200	1
ko01200	Metabolism	Global and overview maps	Carbon metabolism	0.946301	Zm00001eb109370;Zm00001eb092540;novel.560	3	Zm00001eb109370	1	Zm00001eb092540;novel.560	2
ko04144	Cellular Processes	Transport and catabolism	Endocytosis	0.958991	Zm00001eb148310;Zm00001eb148420	2	Zm00001eb148420	1	Zm00001eb148310	1
ko00520	Metabolism	Carbohydrate metabolism	Amino sugar and nucleotide sugar metabolism	0.966938	Zm00001eb272090	1	Zm00001eb272090	1	--	0
ko00500	Metabolism	Carbohydrate metabolism	Starch and sucrose metabolism	0.987789	Zm00001eb418490	1	Zm00001eb418490	1	--	0
ko03010	Genetic Information Processing	Translation	Ribosome	0.988671	Zm00001eb309760;Zm00001eb273740;Zm00001eb413490	3	--	0	Zm00001eb309760;Zm00001eb273740;Zm00001eb413490	3
ko01240	Metabolism	Global and overview maps	Biosynthesis of cofactors	0.996	novel.560	1	--	0	novel.560	1
